# Supplementary material for: Domino Nitro Reduction-Friedländer Heterocyclization for the Preparation of Quinolines
Source: MDPI journal article supplement (doi:10.3390/molecules27134123), 2022-06-27

# Domino nitro reduction-Friedländer heterocyclization for the preparation of quinolines

Kwabena Fobi and Richard A. Bunce\*

Department of Chemistry, Oklahoma State University, Stillwater, OK 74078-3071, U.S.A.; kfobi@ok-state.edu (K.F.)

\* Correspondence: rab@okstate.edu; Tel. +1-405-744-5952

## Supplemental Information

|                                                                                |    |
|--------------------------------------------------------------------------------|----|
| General methods                                                                | 3  |
| General procedure for domino reduction-heterocyclization                       | 3  |
| <sup>1</sup> H and <sup>13</sup> C NMRs for                                    |    |
| 3.3.1. Ethyl 2-methylquinoline-3-carboxylate (Table 1)                         | 4  |
| 3.3.2. Ethyl 2-(trifluoromethyl) quinoline-3-carboxylate (Table 1)             | 5  |
| 3.3.3. Methyl 2-ethylquinoline-3-carboxylate (Table 1)                         | 6  |
| 3.3.4. Methyl 2-pentylquinoline-3-carboxylate (Table 1)                        | 7  |
| 3.3.5. Methyl 2-isopropylquinoline-3-carboxylate (Table 1)                     | 8  |
| 3.3.6. Methyl 2-( <i>tert</i> -butyl) quinoline-3-carboxylate (Table 1)        | 9  |
| 3.3.7. Ethyl 2-phenylquinoline-3-carboxylate (Table 1)                         | 10 |
| 3.3.8. Methyl 2-benzylquinoline-3-carboxylate (Table 1)                        | 11 |
| 3.3.9. Methyl 2-phenethylquinoline-3-carboxylate (Table 1)                     | 12 |
| 3.3.10. Methyl 2-(phenoxyethyl)quinoline-3-carboxylate (Table 1)               | 13 |
| 3.3.11. 2-Methyl-3-(phenylsulfonyl)quinoline (Table 1)                         | 14 |
| 3.3.12. 2-Methylquinoline-3-carbonitrile (Table 1)                             | 15 |
| 3.3.13. 2-Phenylquinoline-3-carbonitrile (Table 1)                             | 16 |
| 3.3.14. 3,3-Dimethyl-3,4-dihydroacridin-1(2 <i>H</i> )-one (Table 1)           | 17 |
| 3.3.15. 1-(2-Methylquinolin-3-yl)ethan-1-one (Table 1)                         | 18 |
| 3.3.16. 2-Methylquinolin-3-yl(phenyl)methanone (Table 1)                       | 19 |
| 3.3.17. 2-Methyl-3-phenylquinoline (Table 1)                                   | 20 |
| 3.3.18. 2,3-Diphenylquinoline (Table 1)                                        | 21 |
| 3.3.19. 5,6-Dihydrobenzo[ <i>a</i> ]acridine (Table 1)                         | 22 |
| 3.4.1. Ethyl 6-fluoro-2-(trifluoromethyl)quinoline-3-carboxylate (Table 2)     | 23 |
| 3.4.2. Methyl 6-fluoro-2-isopropylquinoline-3-carboxylate (Table 2)            | 24 |
| 3.4.3. Ethyl 6-fluoro-2-phenylquinoline-3-carboxylate (Table 2)                | 25 |
| 3.4.4. Methyl 2-benzyl-6-fluoroquinoline-3-carboxylate (Table 2)               | 26 |
| 3.4.5. 6-Fluoro-2-methyl-3-(phenylsulfonyl)quinoline (Table 2 5)               | 27 |
| 3.4.6. 6-Fluoro-2-phenylquinoline-3-carbonitrile (Table 2)                     | 28 |
| 3.4.7. 7-Fluoro-3, 3-dimethyl-3, 4-dihydroacridin-1(2 <i>H</i> )-one (Table 2) | 29 |
| 3.5.1. Ethyl 6-methoxy-2-(trifluoromethyl)quinoline-3-carboxylate (Table 3)    | 30 |
| 3.5.2. Methyl 2-isopropyl-6-methoxyquinoline-3-carboxylate (Table 3)           | 31 |
| 3.5.3. Ethyl 6-methoxy-2-phenylquinoline-3-carboxylate (Table 3)               | 32 |
| 3.5.4. Methyl 2-benzyl-6-methoxyquinoline-3-carboxylate (Table 3)              | 33 |
| 3.5.5. 6-Methoxy-2-methyl-3-(phenylsulfonyl)quinoline (Table 3)                | 34 |

|                                                                                |    |
|--------------------------------------------------------------------------------|----|
| 3.5.6. 6-Methoxy-2-phenylquinoline-3-carbonitrile (Table 3)                    | 35 |
| 3.5.7. 7-Methoxy-3,3-dimethyl-3,4-dihydroacridine-1(2 <i>H</i> )-one (Table 3) | 36 |
| 3.6.1. 4-Methyl-3-propionylquinolin-2(1 <i>H</i> )-one (Table 4)               | 37 |
| 3.6.2. 3-Benzoyl-4-methylquinolin-2(1 <i>H</i> )-one (Table 4)                 | 38 |
| 3.6.3. 4-Methyl-2-phenylquinoline-3-carbonitrile (Table 4)                     | 39 |
| 3.6.4. 1-(2,4-Dimethylquinolin-3-yl)ethan-1-one (Table 4)                      | 40 |
| 3.6.5. 3,3,9-Trimethyl-3,4-dihydroacridin-1(2 <i>H</i> )-one (Table 4)         | 41 |
| 3.6.6. 2,4-Dimethyl-3-phenylquinoline (Table 4)                                | 42 |
| 3.6.7. 12-Methyl-5,6-dihydrobenzo[ <i>a</i> ]acridine (Table 4)                | 43 |
| 3.7.1. Methyl 2-ethyl-4-phenylquinoline-3-carboxylate (Table 5)                | 44 |
| 3.7.2-3.7.3. 3-Benzoyl-4-phenylquinolin-2(1 <i>H</i> )-one (Table 5)           | 45 |
| 3.7.4. (2-Methyl-4-phenylquinolin-3-yl)ethan-1-one (Table 5)                   | 46 |
| 3.7.5. 3,3-Dimethyl-9-phenyl-3,4-dihydroacridin-1(2 <i>H</i> )-one (Table 5)   | 47 |
| 3.7.6. 2-Methyl-3,4-diphenylquinoline (Table 5)                                | 48 |
| 3.7.7. 3-Butyl-2,4-diphenylquinoline (Table 5)                                 | 49 |
| 3.7.8. 12-Phenyl-5,6-dihydrobenzo[ <i>a</i> ]acridine (Table 5)                | 50 |

### General Methods.

Unless otherwise indicated, all reactions were performed under dry N<sub>2</sub> in oven-dried glassware. All reagents and solvents were used as received. 2-Nitrobenzophenone (**1e**) was prepared using the literature procedure [29,30]. Reactions were monitored by thin layer chromatography on Analtech No 21521 silica gel GF plates (Newark, DE, USA). Preparative separations were performed by flash chromatography on silica gel (Davisil®, grade 62, 60–200 mesh) containing 0.5% of UV-05 UV-active phosphor (both from Sorbent Technologies, Norcross, GA, USA) slurry packed into quartz columns. Band elution for all chromatographic separations was monitored using a hand-held UV lamp (Fisher Scientific, Pittsburgh, PA, USA). Wash solutions used in work-up procedures were all aqueous. Melting points were obtained using a MEL-TEMP apparatus (Cambridge, MA, USA) and are uncorrected. FT-IR spectra were run as thin films on NaCl disks using a Nicolet iS50 spectrophotometer (Madison WI, USA). <sup>1</sup>H- and <sup>13</sup>C-NMR spectra were measured using a Bruker Avance 400 system (Billerica, MA, USA) at 400 MHz and 101 MHz, respectively, in the indicated solvents containing 0.05% (CH<sub>3</sub>)<sub>4</sub>Si as the internal standard; coupling constants (*J*) are given in Hz. Low-resolution mass spectra were obtained using a Hewlett-Packard Model 1800A GCD GC-MS system (Palo Alto, CA, USA). Elemental analyses (± 0.4%) were determined by Atlantic Microlabs (Norcross, GA, USA) and are provided only for new compounds.

### General procedure for domino reduction-heterocyclization.

To a solution of the 2-nitrobenzaldehyde (1.32 mmol, 1 equiv.) in AcOH (10 mL) under N<sub>2</sub> was added the active methylene compound: 3 equiv. for all active ketones except ethyl benzoylacetate, deoxybenzoin, 1-benzoylacetone, dimedone and methyl 4-phenylacetoacetate where 2 equiv. were used. The mixture was stirred for 15 min at 95–110 °C before addition of Fe (<100 mesh, 4 equiv. relative to the nitro compound). When TLC (20% EtOAc in hexane) indicated complete consumption of the starting material (3–6 h), unreacted Fe was removed by filtration through Celite before the solution was diluted with ether (50 mL) and washed with water (3 × 30 mL) to remove the AcOH. The ether was washed with NaHCO<sub>3</sub> (2 × 25 mL) and saturated NaCl (1 × 25 mL), and then dried (Na<sub>2</sub>SO<sub>4</sub>). Removal of the solvent under vacuum gave a crude product, which was further purified by column chromatography (25 cm × 2 cm) using increasing concentrations of ethyl acetate (5–15%) in hexanes to afford analytical samples of the heterocyclic products. The compounds prepared are given in Tables 1–5.

### 3.3.1. <sup>1</sup>H NMR for Ethyl 2-methylquinoline-3-carboxylate (Table 1, entry 1)

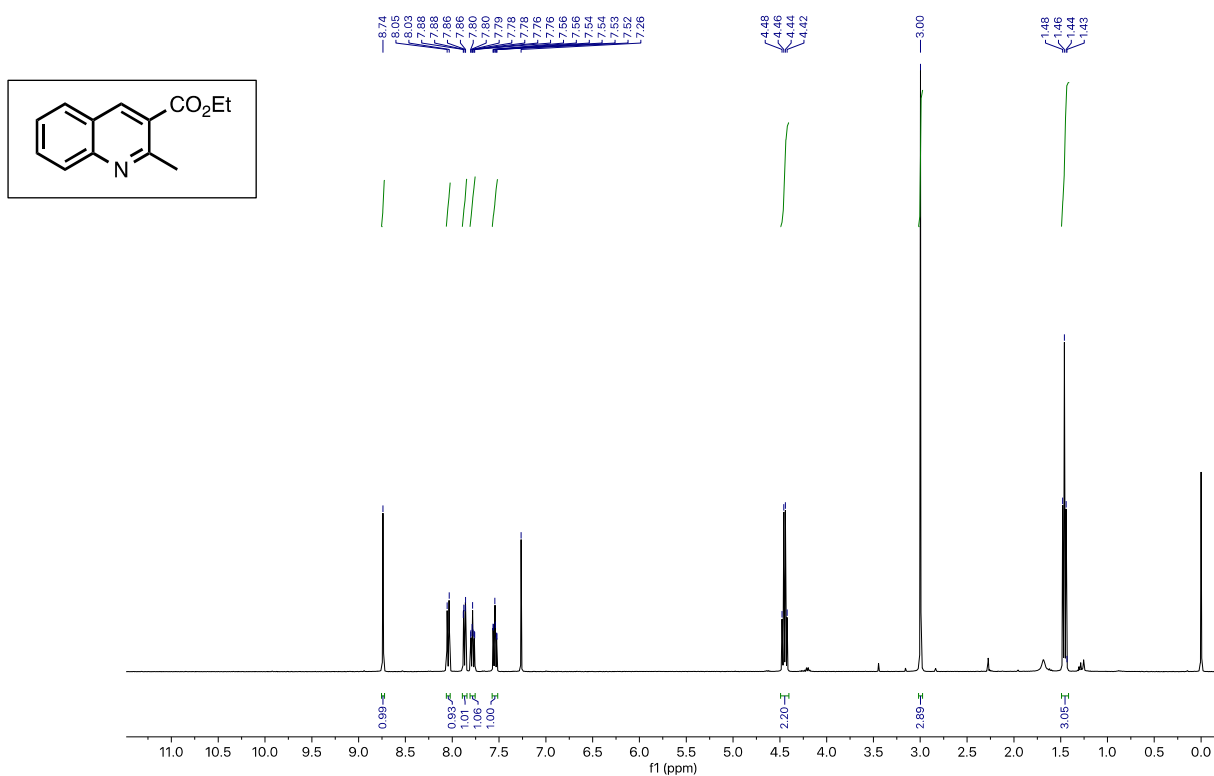

### 3.3.1. <sup>13</sup>C NMR for Ethyl 2-methylquinoline-3-carboxylate (Table 1, entry 1)

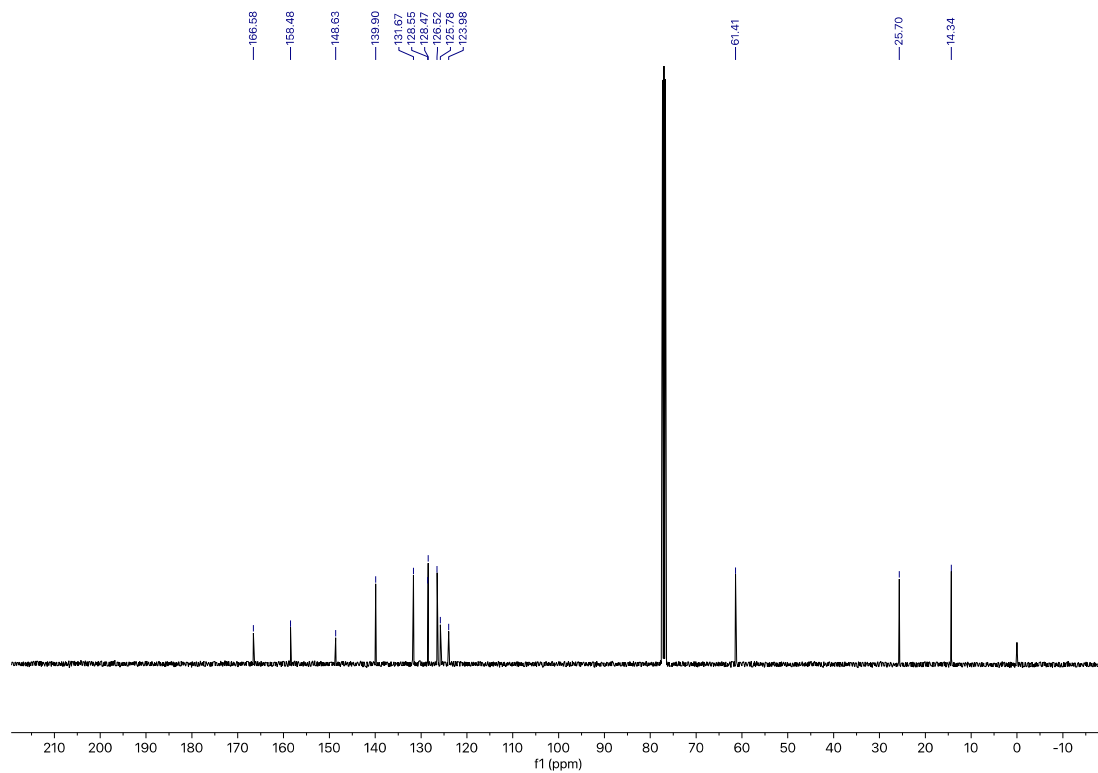

### 3.3.2. <sup>1</sup>H NMR for Ethyl 2-(trifluoromethyl)quinoline-3-carboxylate (Table 1, entry 2)

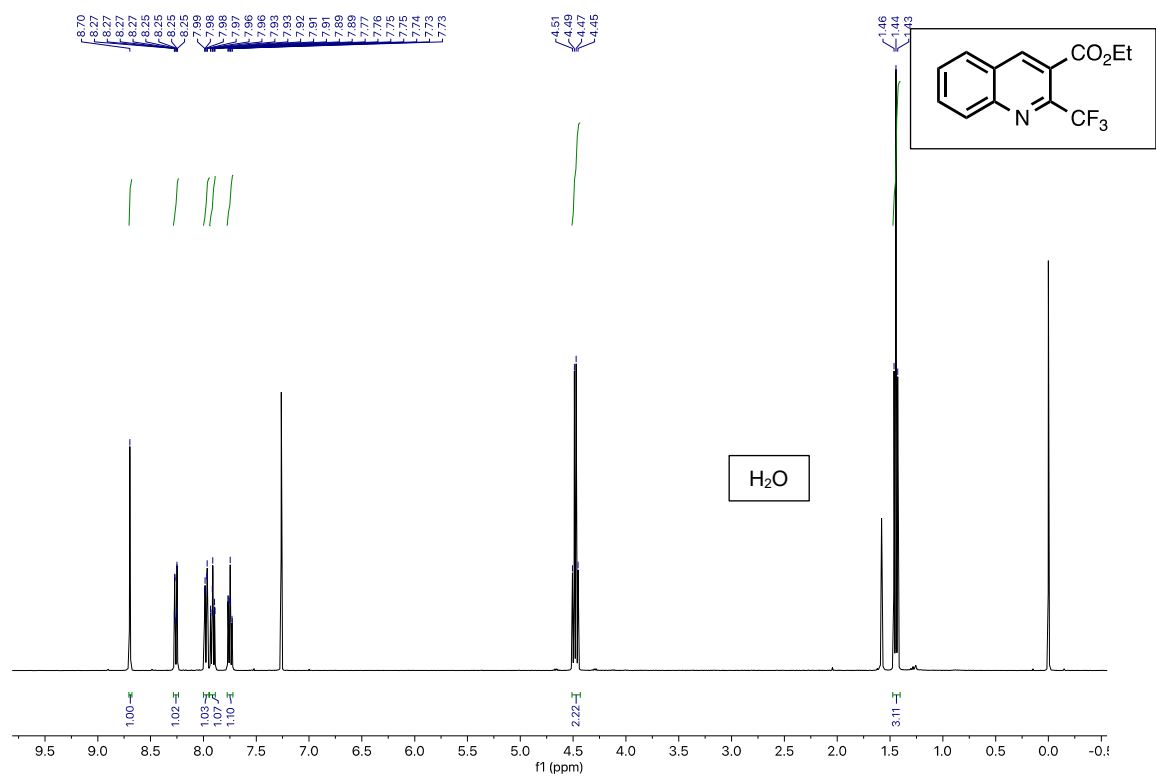

### 3.3.2. <sup>13</sup>C NMR for Ethyl 2-(trifluoromethyl)quinoline-3-carboxylate (Table 1, entry 2)

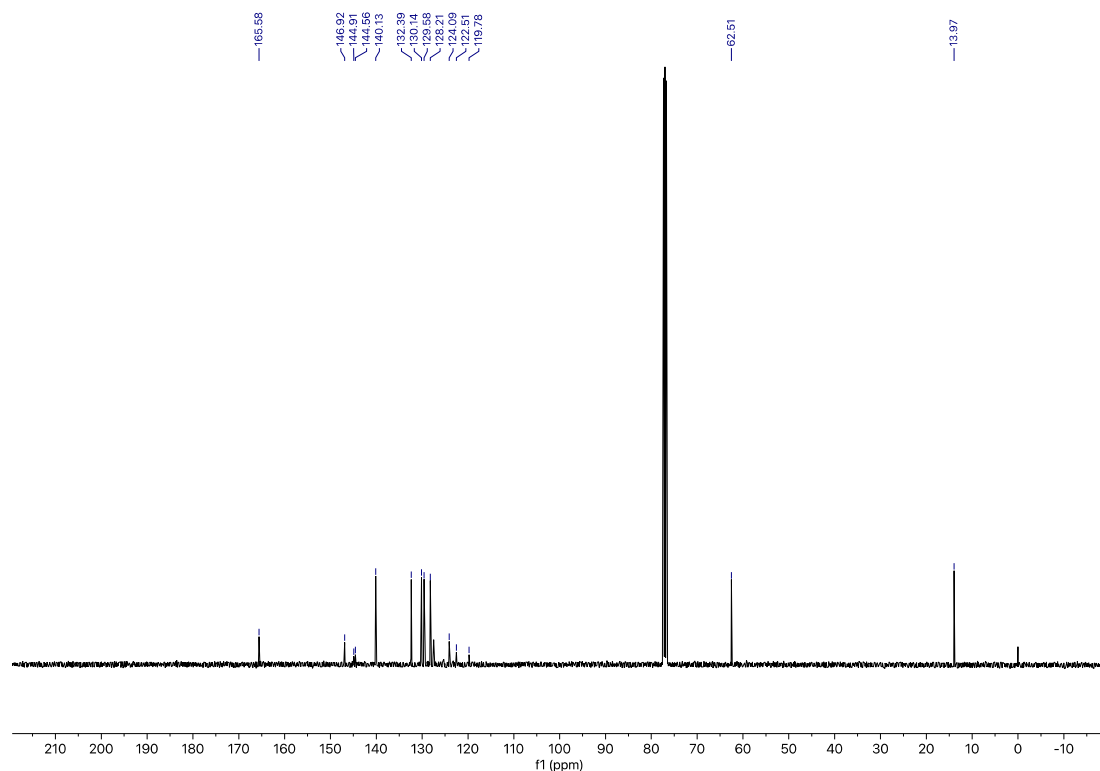

### 3.3.3. <sup>1</sup>H NMR for Methyl 2-ethylquinoline-3-carboxylate (Table 1, entry 3)

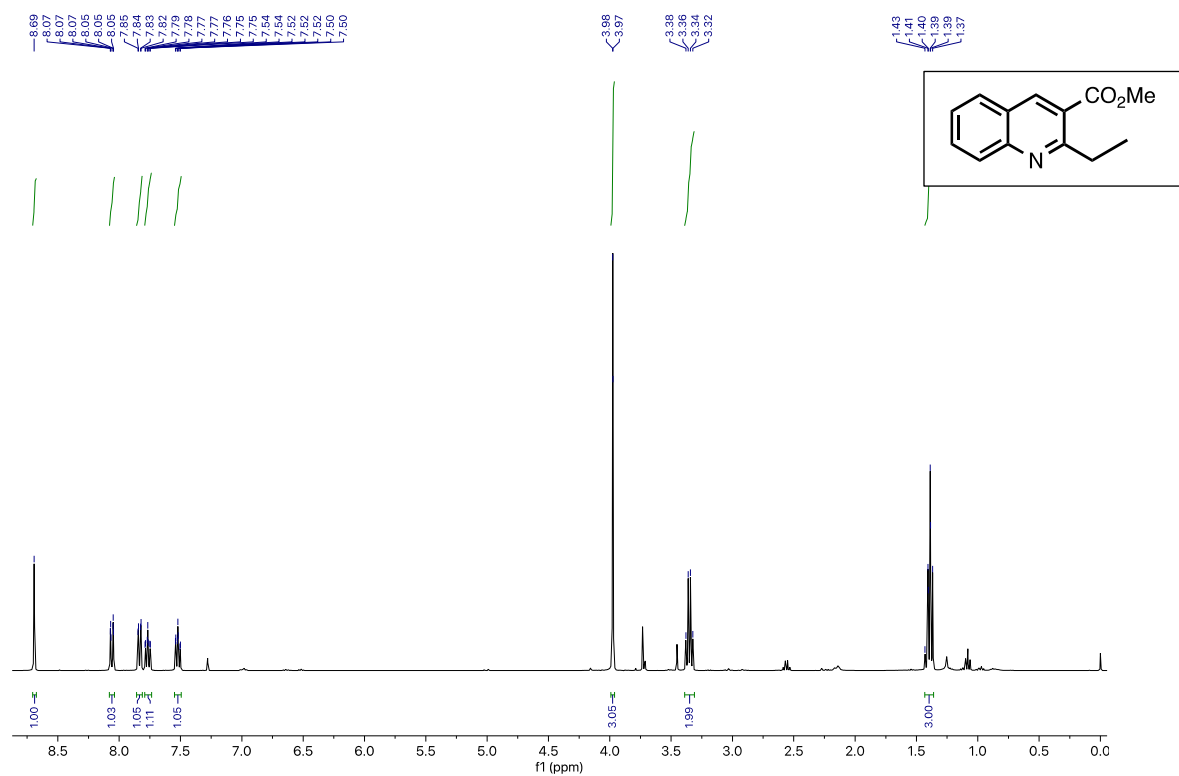

### 3.3.3. <sup>13</sup>C NMR for Methyl 2-ethylquinoline-3-carboxylate (Table 1, entry 3)

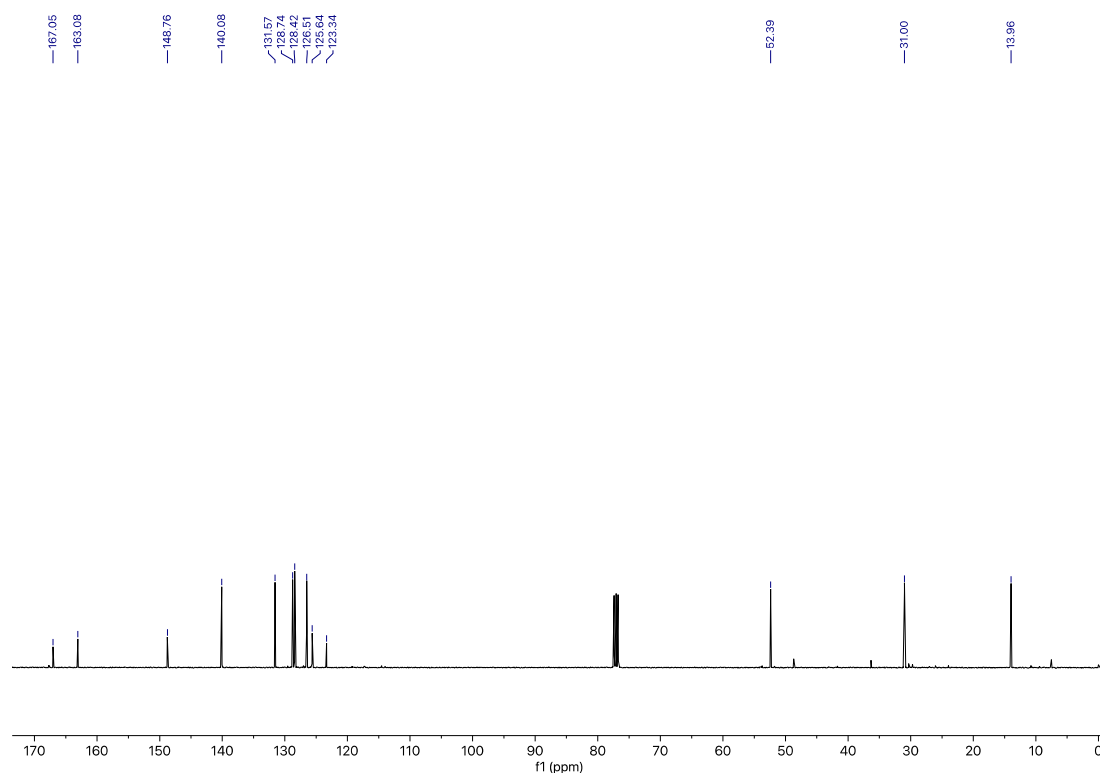

### 3.3.4. <sup>1</sup>H NMR for Methyl 2-pentylquinoline-3-carboxylate (Table 1, entry 4)

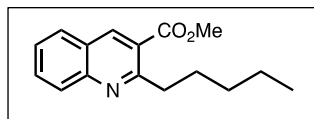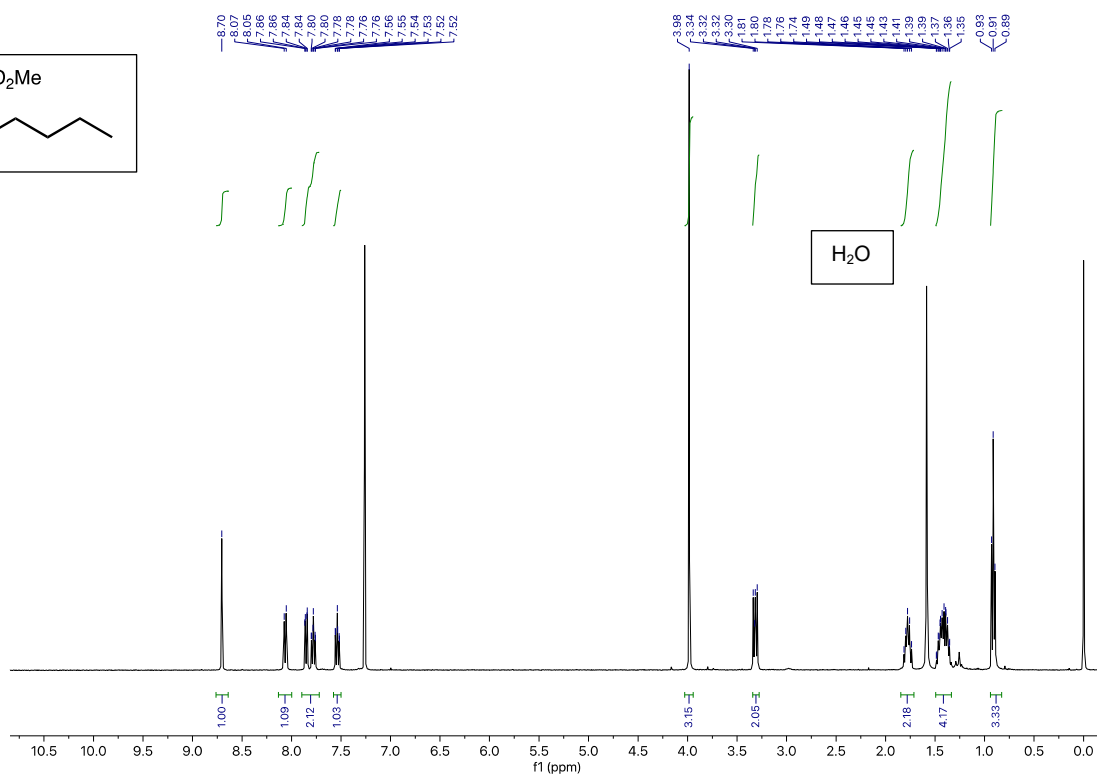

### 3.3.4. <sup>13</sup>C NMR for Methyl 2-pentylquinoline-3-carboxylate (Table 1, entry 4)

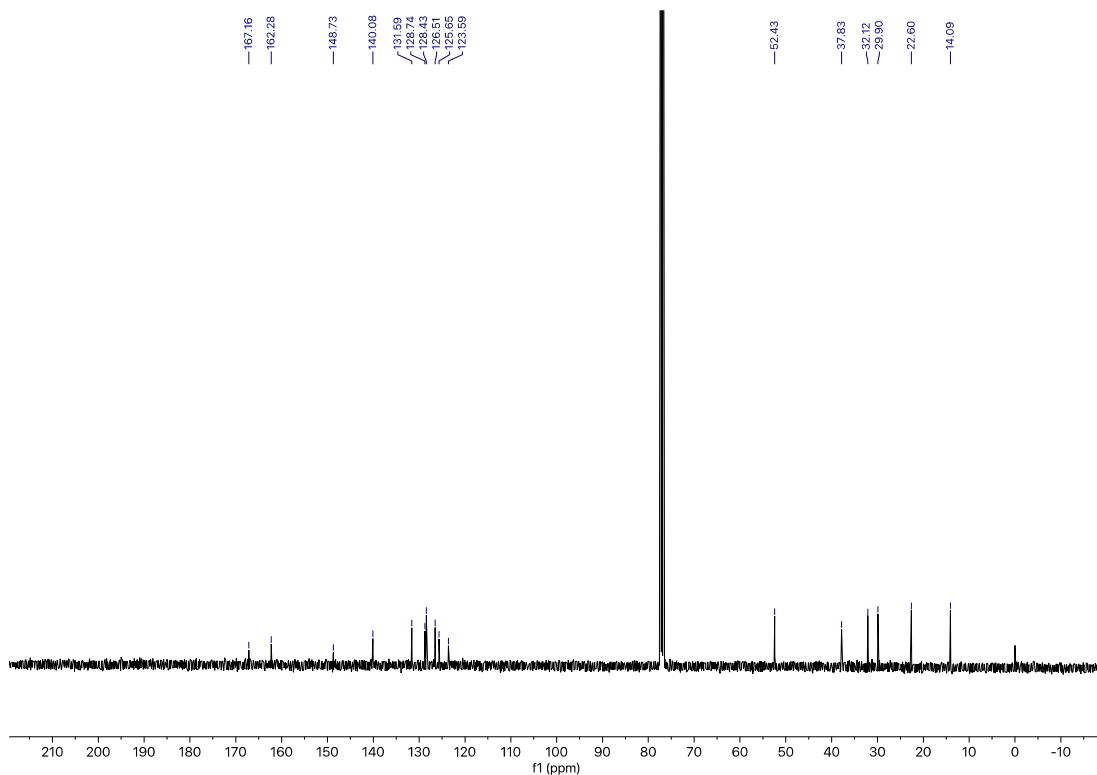

### 3.3.5. <sup>1</sup>H NMR for Methyl 2-isopropylquinoline-3-carboxylate (Table 1, entry 5)

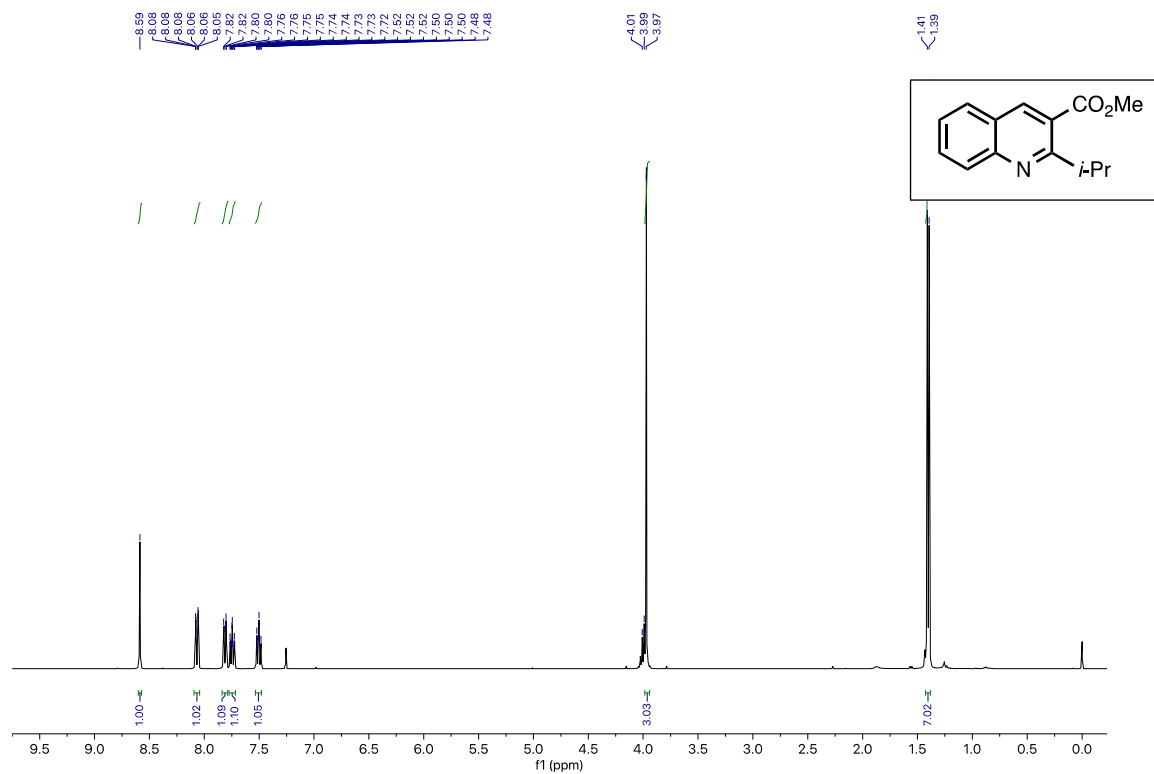

### 3.3.5. <sup>13</sup>C NMR for Methyl 2-isopropylquinoline-3-carboxylate (Table 1, entry 5)

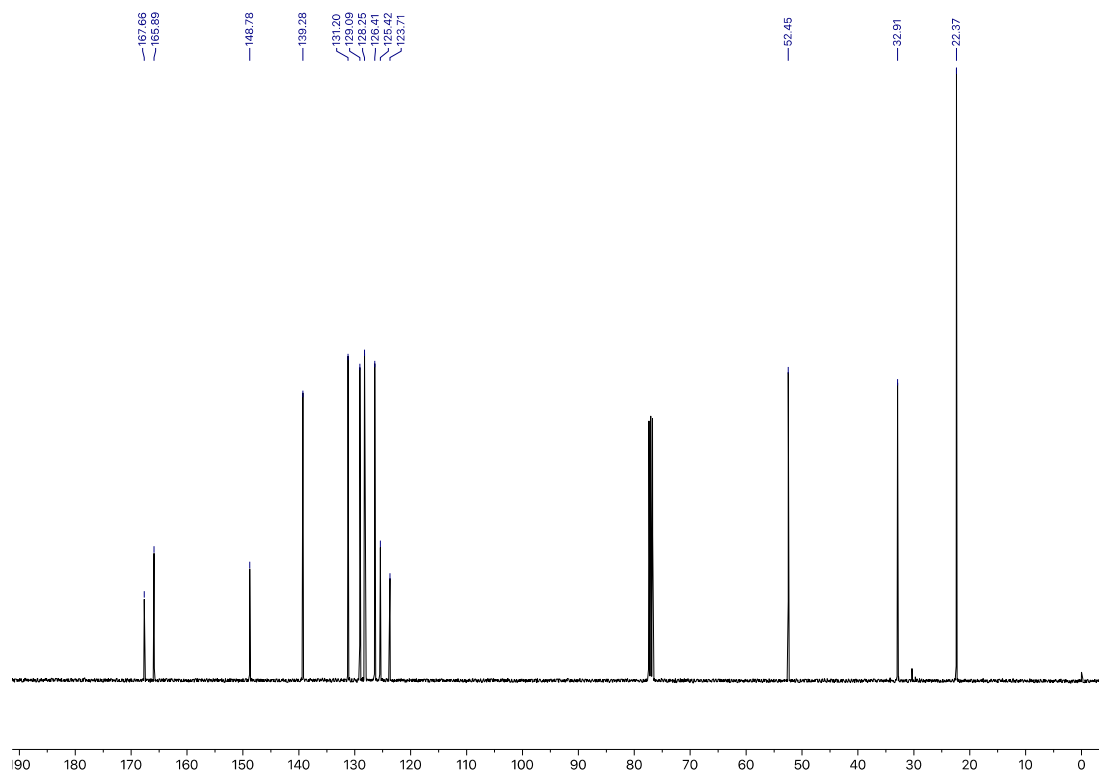

### 3.3.6. <sup>1</sup>H NMR for Methyl 2-(*tert*-butyl) quinoline-3-carboxylate (Table 1, entry 6)

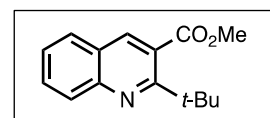



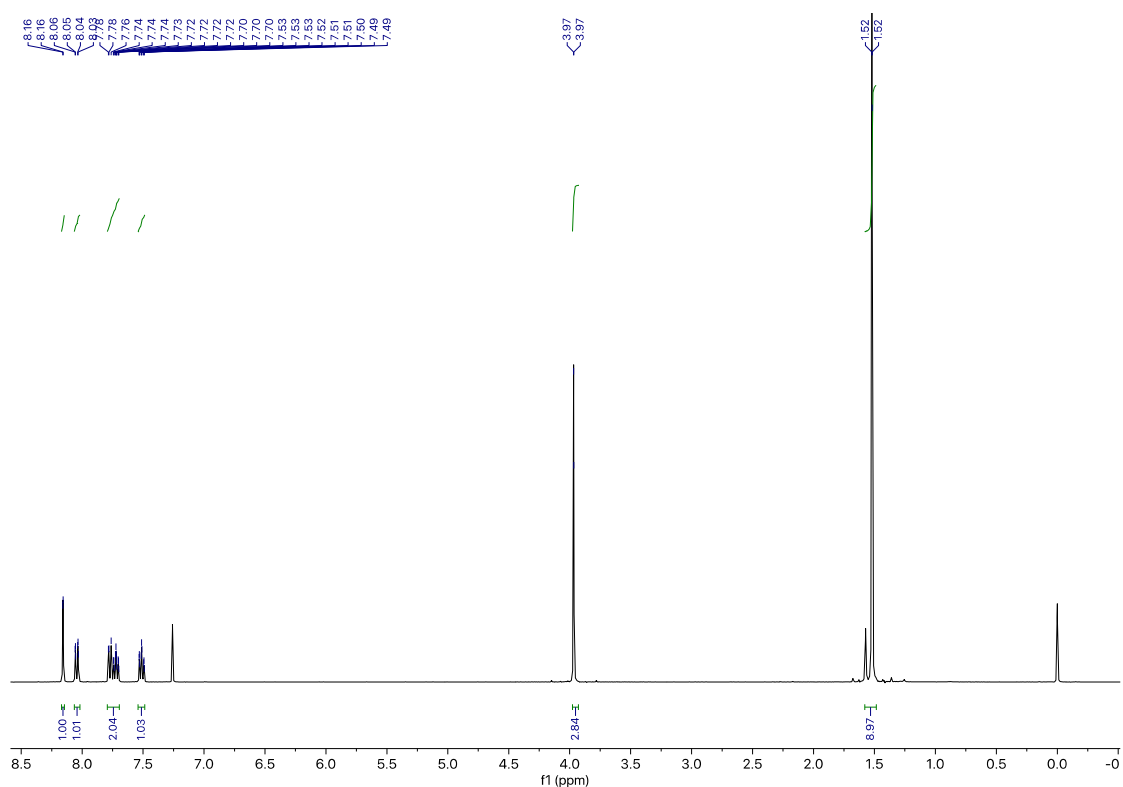

### 3.3.6. <sup>13</sup>C NMR for Methyl 2-(*tert*-butyl) quinoline-3-carboxylate (Table 1, entry 6)

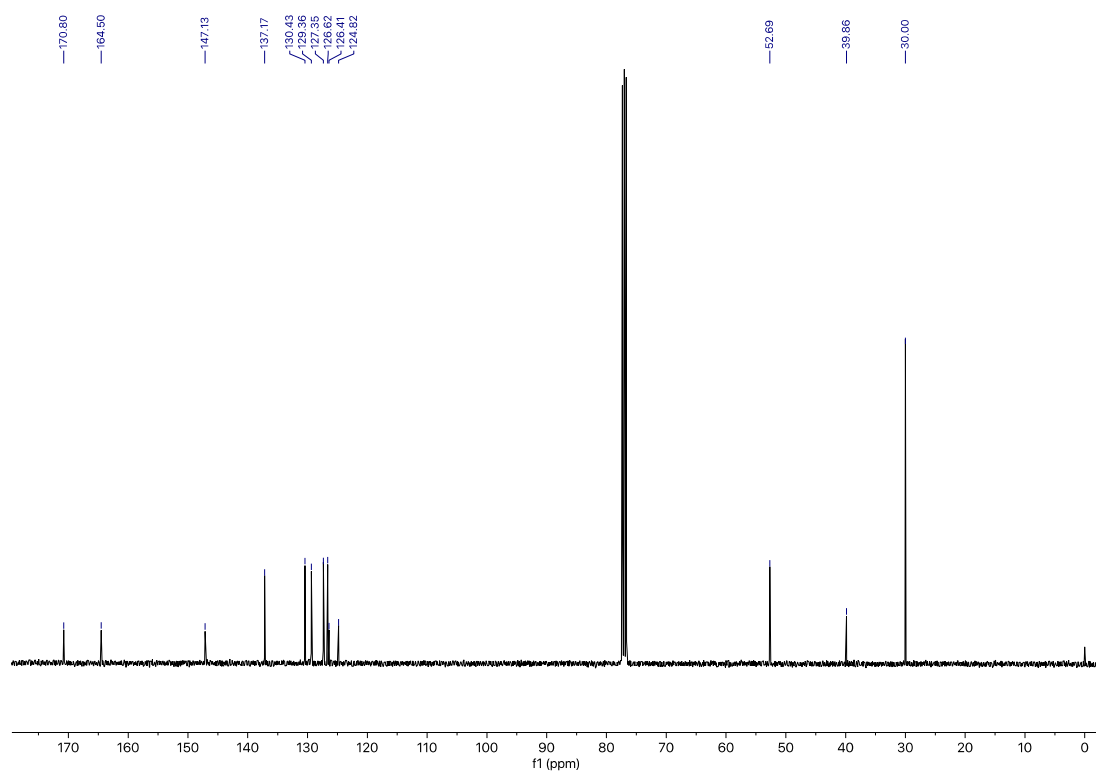

### 3.3.7. <sup>1</sup>H NMR for Ethyl 2-phenylquinoline-3-carboxylate (Table 1, entry 7)

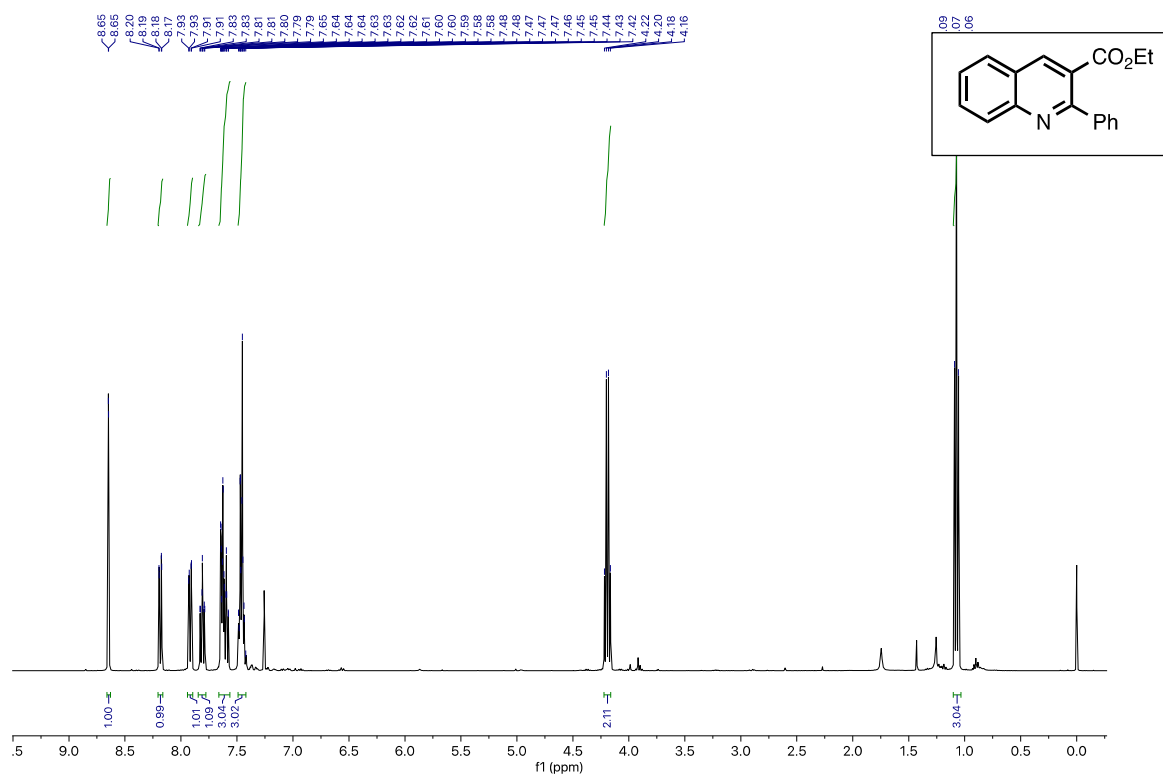

### 3.3.7. <sup>13</sup>C NMR for Ethyl 2-phenylquinoline-3-carboxylate (Table 1, entry 7)

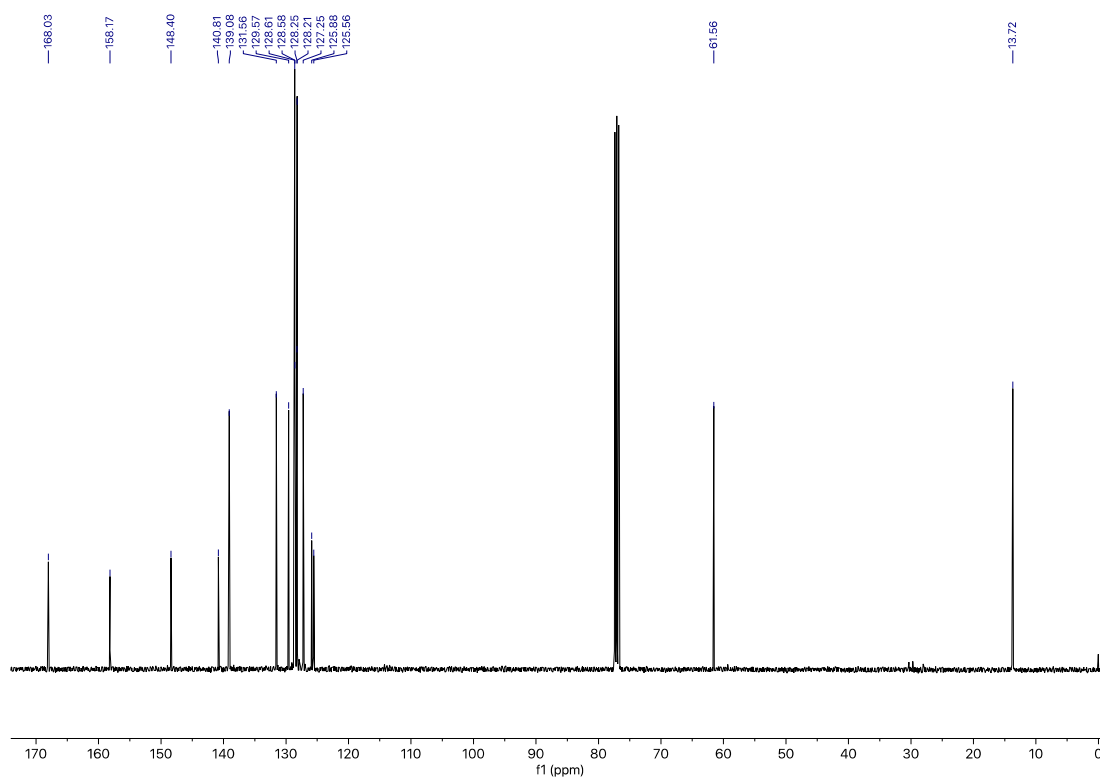

### 3.3.8. <sup>1</sup>H NMR for Methyl 2-benzylquinoline-3-carboxylate (Table 1, entry 8)

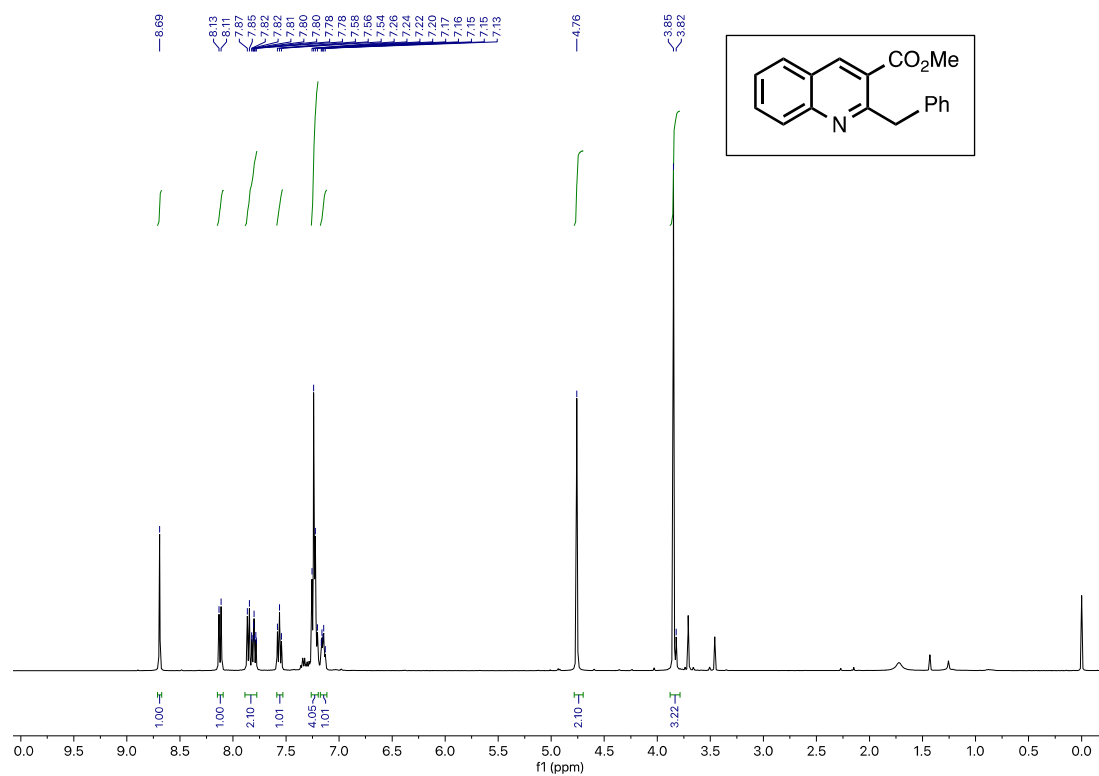

### 3.3.8. <sup>13</sup>C NMR for Methyl 2-benzylquinoline-3-carboxylate (Table 1, entry 8)

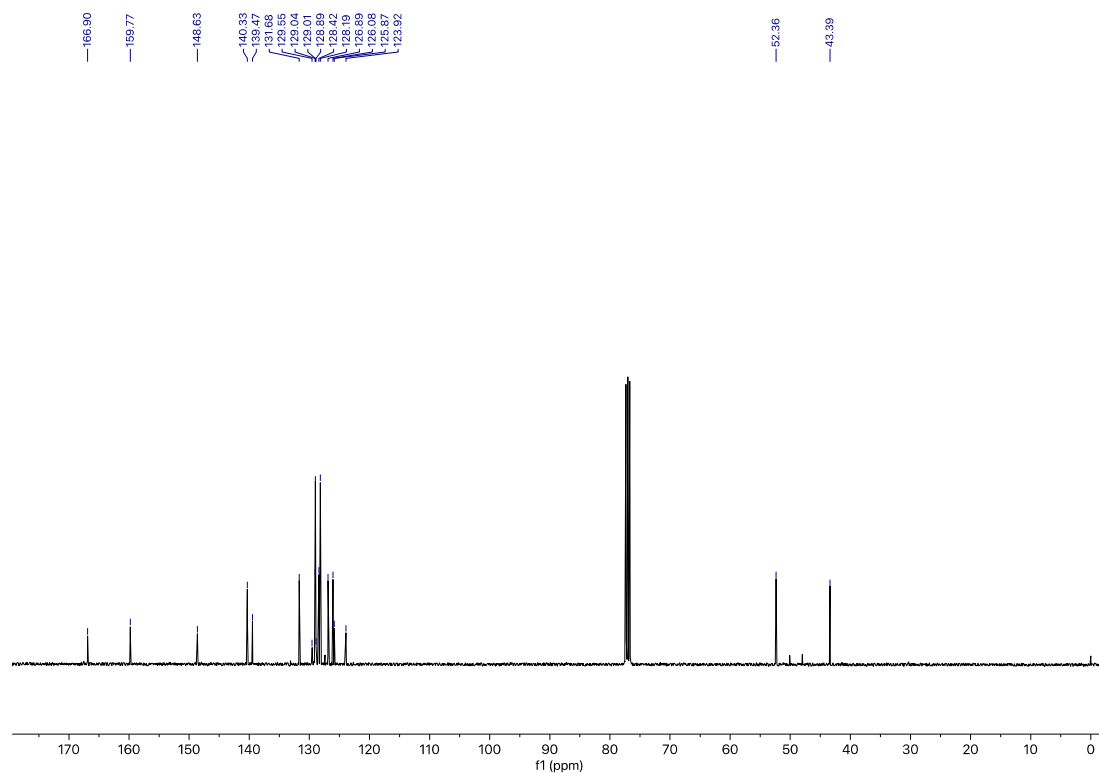

### 3.3.9. <sup>1</sup>H NMR for Methyl 2-phenethylquinoline-3-carboxylate (Table 1, entry 9)

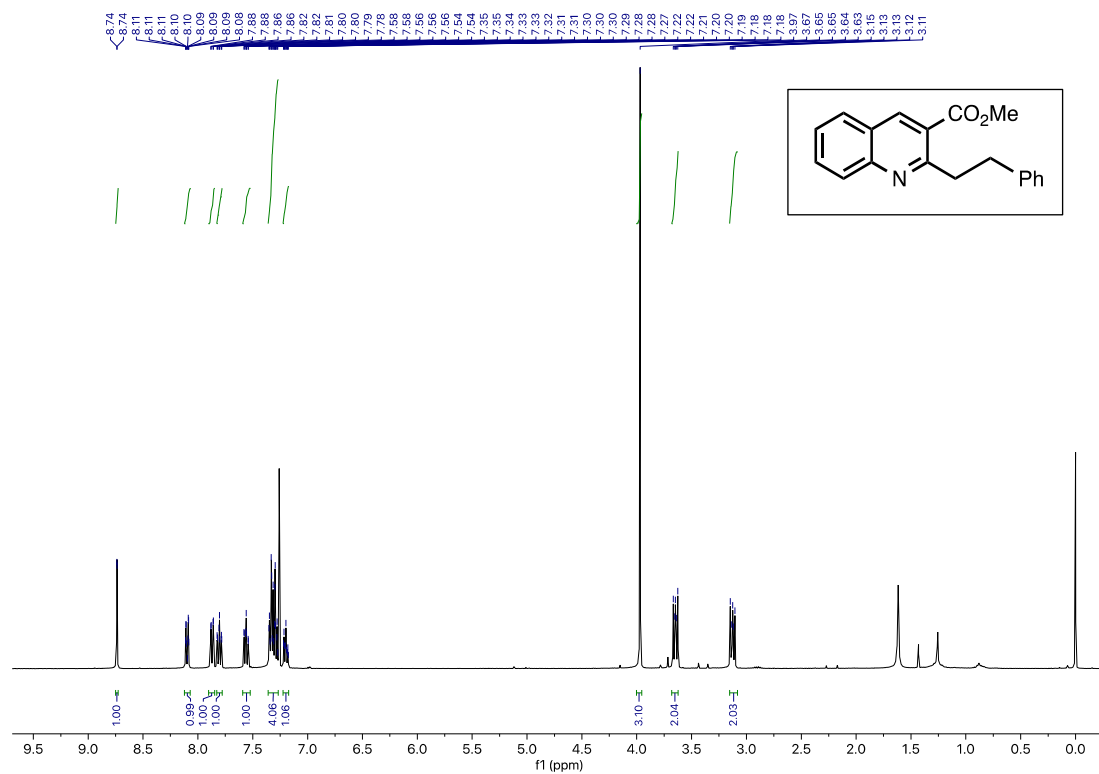

### 3.3.9. <sup>13</sup>C NMR for Methyl 2-phenethylquinoline-3-carboxylate (Table 1, entry 9)

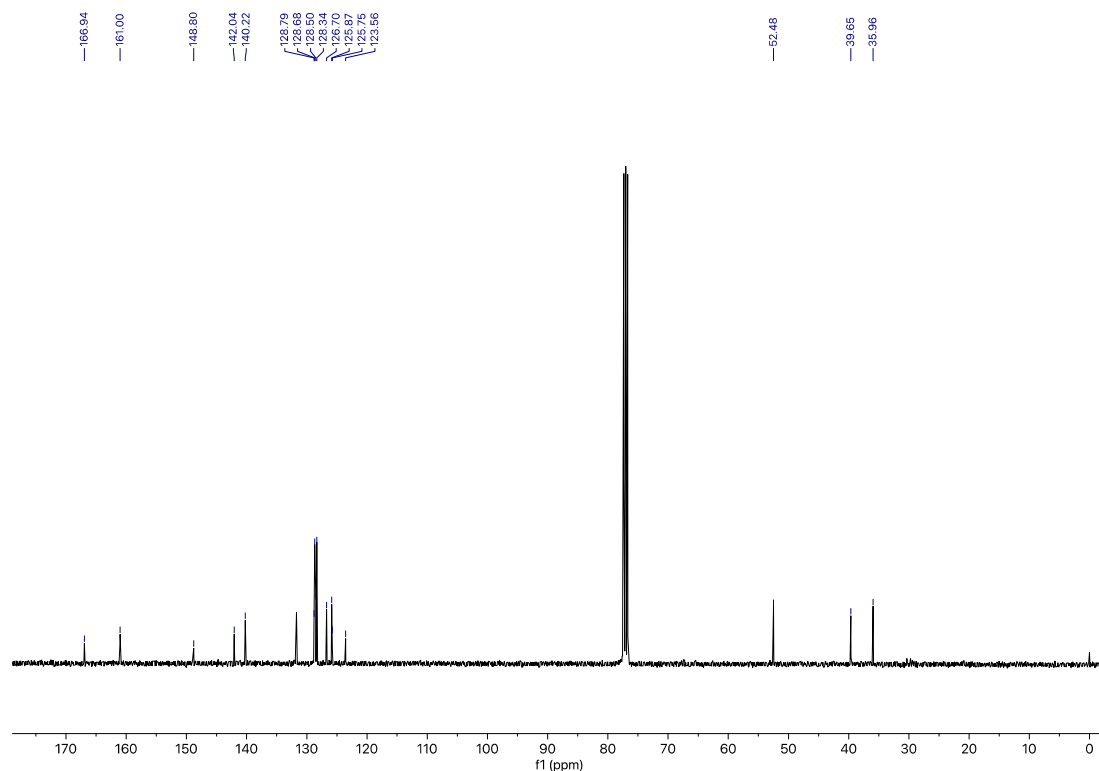

### 3.3.10. <sup>1</sup>H NMR for Methyl 2-(phoxymethyl)quinoline-3-carboxylate (Table 1, entry 10)

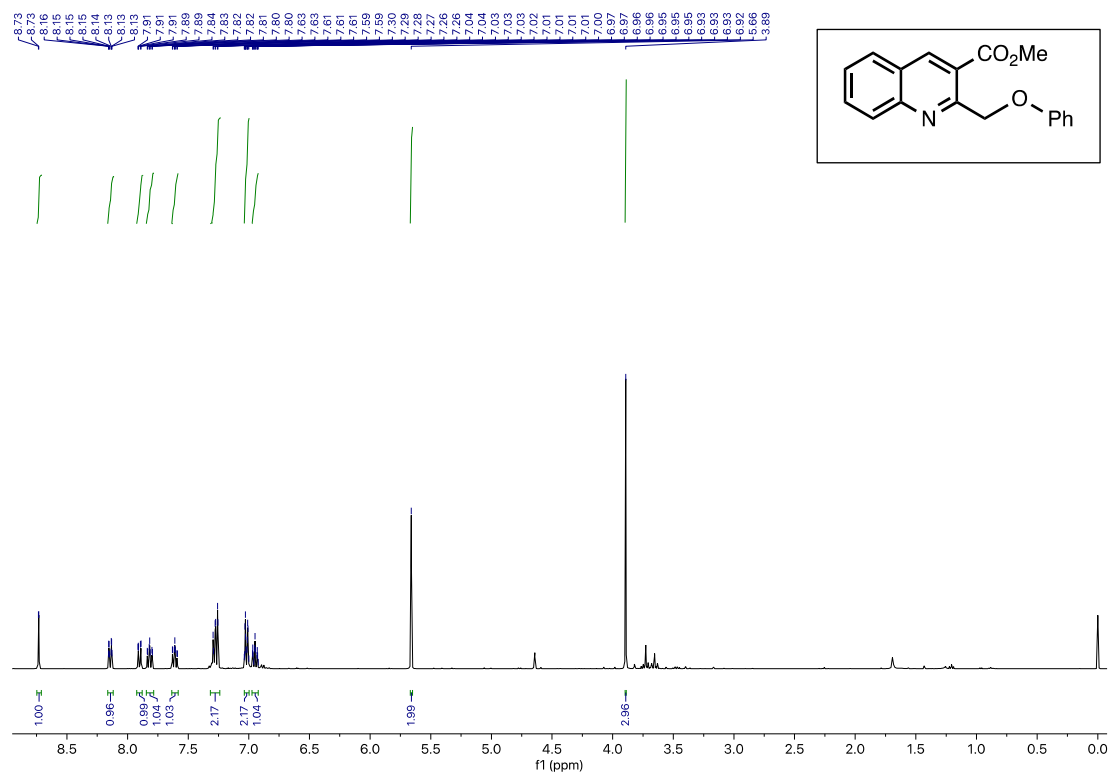

### 3.3.10. <sup>13</sup>C NMR for Methyl 2-(phenoxyethyl)quinoline-3-carboxylate (Table 1, entry 10)

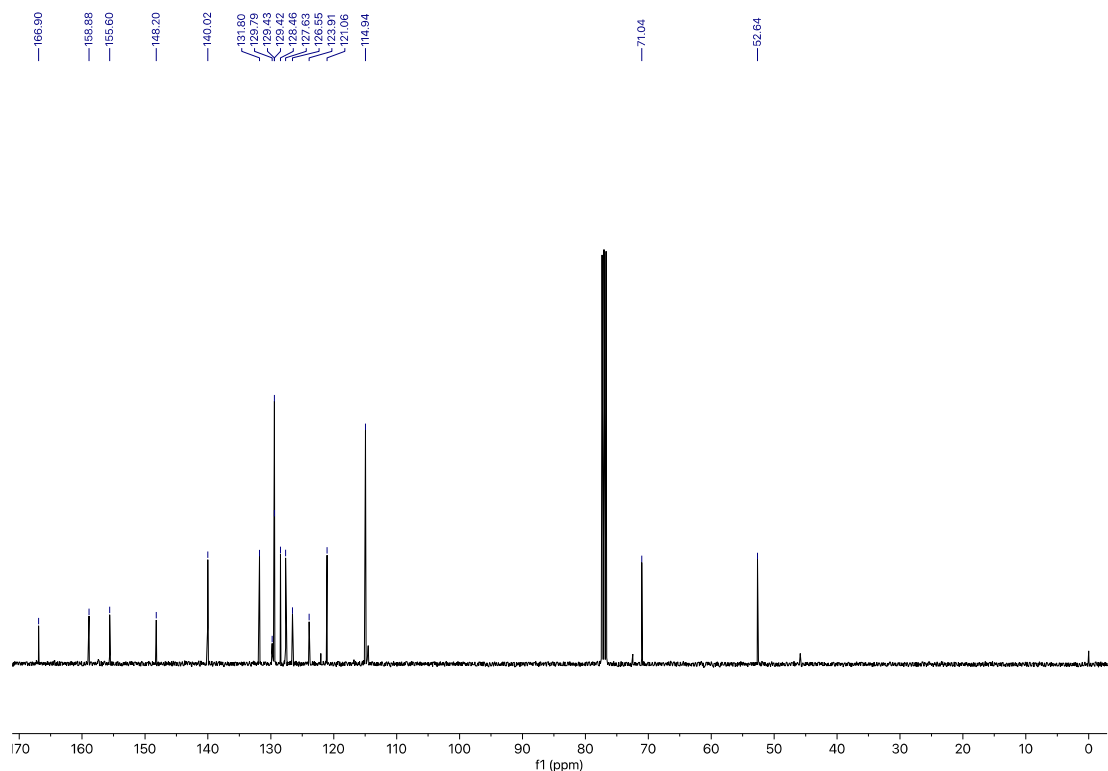

### 3.3.11. <sup>1</sup>H NMR for 2-Methyl-3-(phenylsulfonyl)quinoline (Table 1, entry 11)

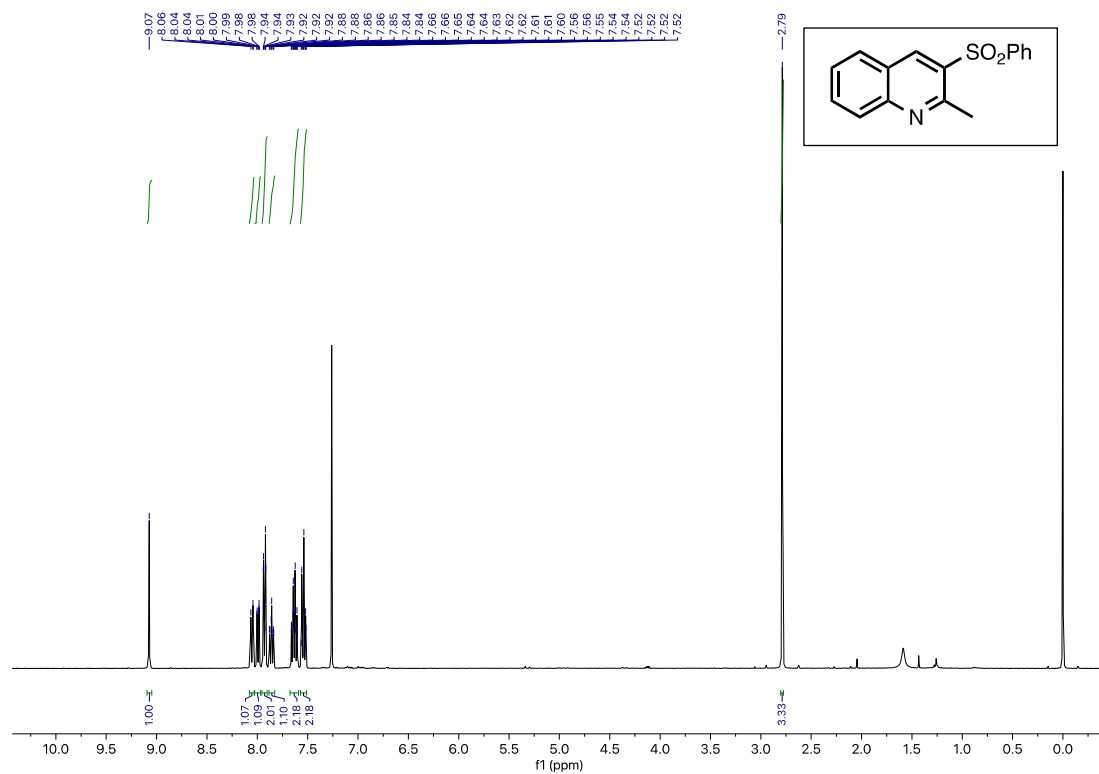

### 3.3.11. <sup>13</sup>C NMR for 2-Methyl-3-(phenylsulfonyl)quinoline (Table 1, entry 11)

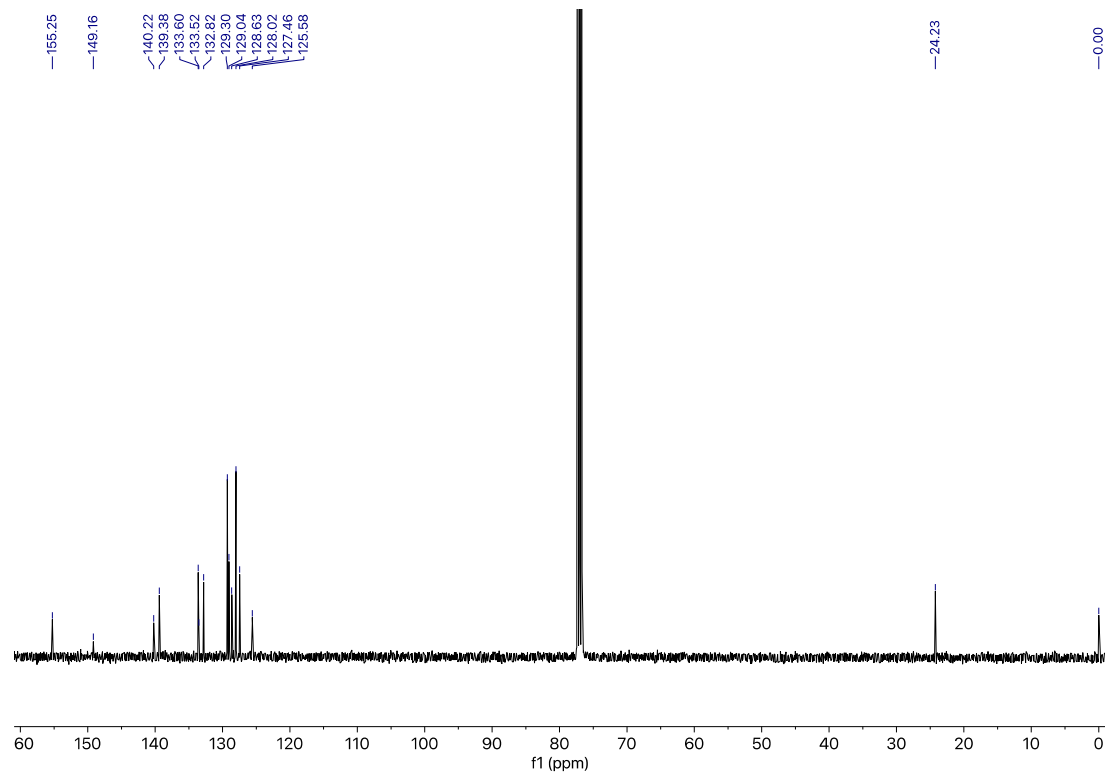

### 3.3.12. <sup>1</sup>H NMR for 2-Methylquinoline-3-carbonitrile (Table 1, entry 12)

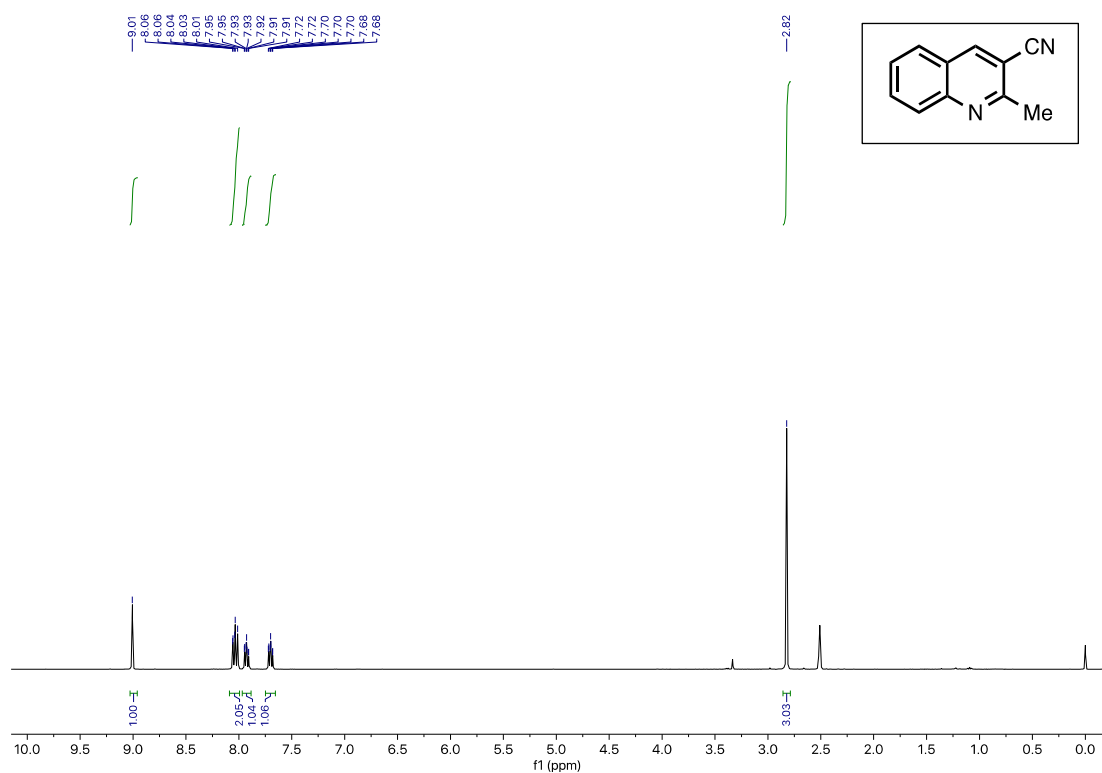

### 3.3.12. <sup>13</sup>C NMR for 2-Methylquinoline-3-carbonitrile (Table 1, entry 12)

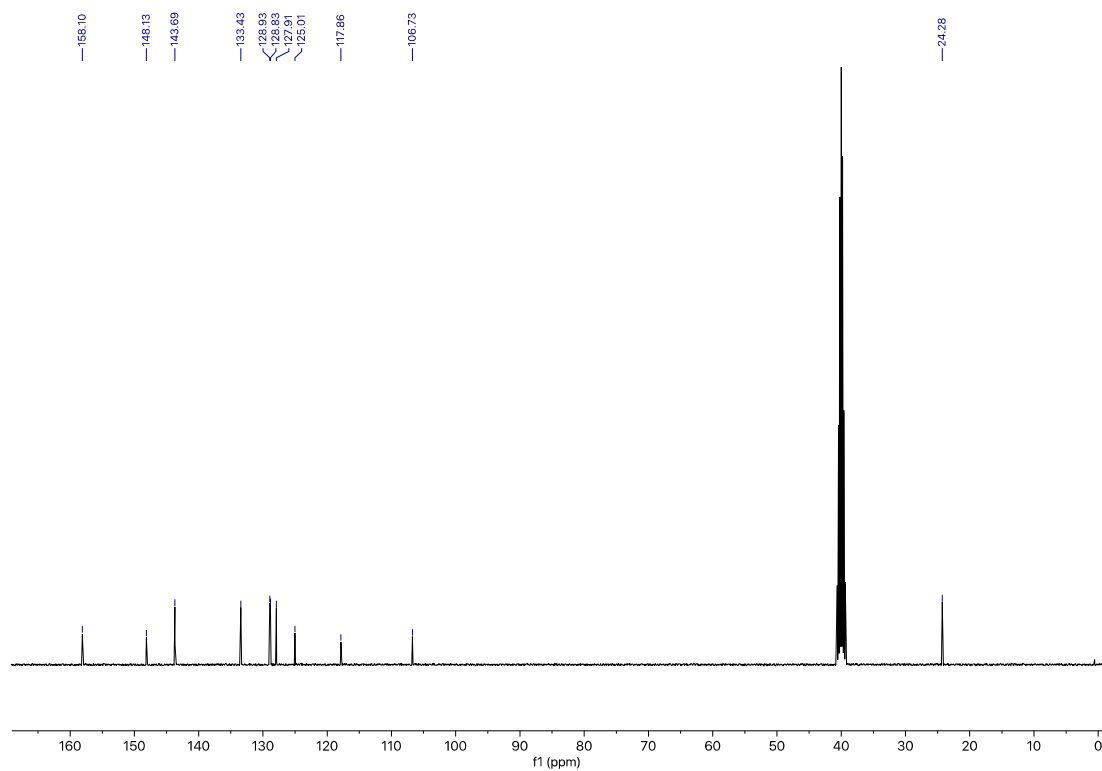

### 3.3.13. <sup>1</sup>H NMR for 2-Phenylquinoline-3-carbonitrile (Table 1, entry 13)

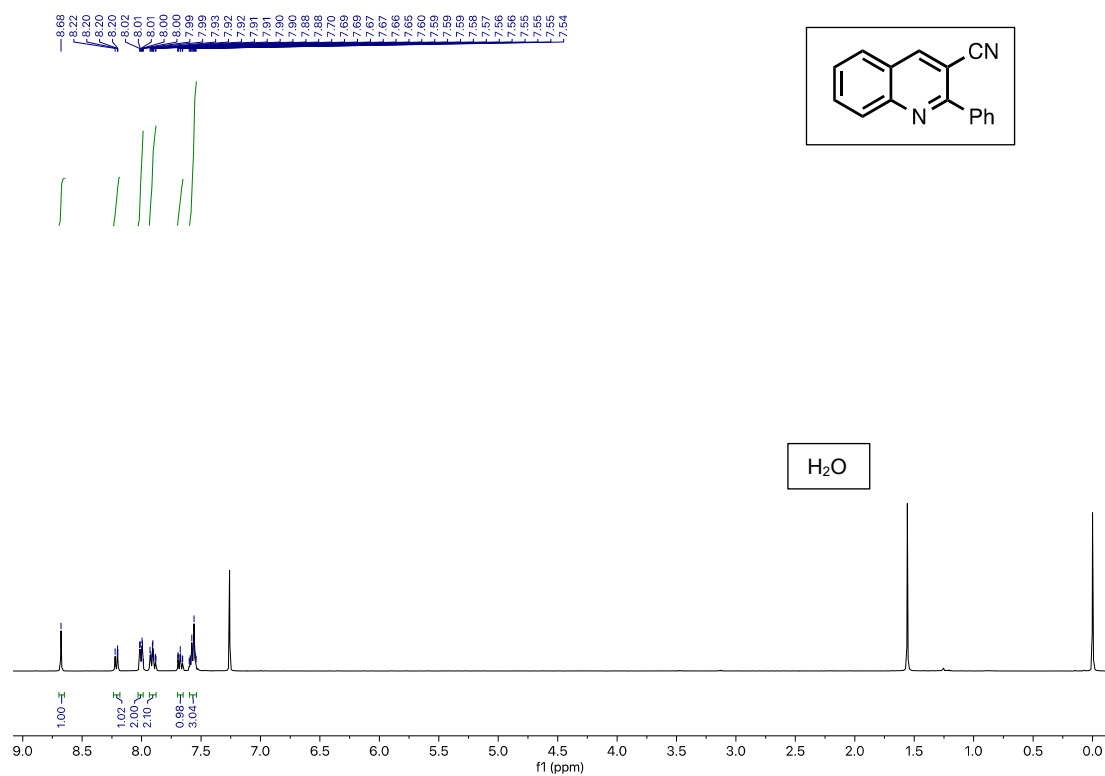

### 3.3.13. <sup>13</sup>C NMR for 2-Phenylquinoline-3-carbonitrile (Table 1, entry 13)

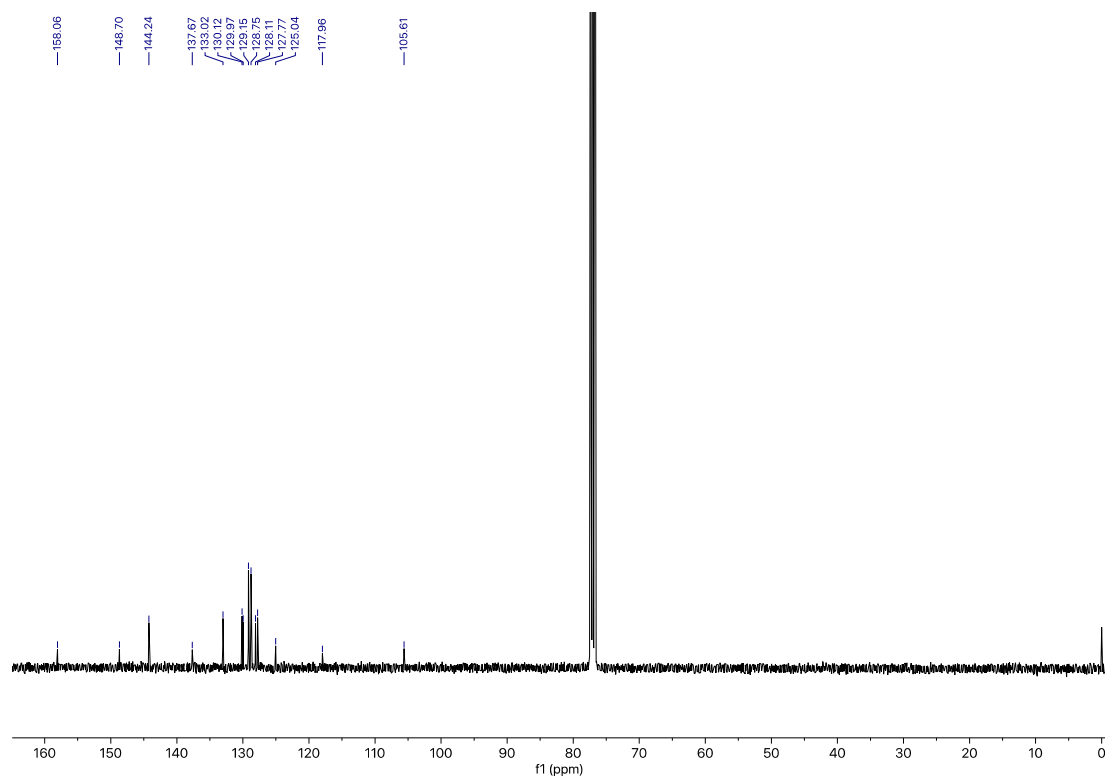

### 3.3.14. <sup>1</sup>H NMR for 3,3-Dimethyl-3,4-dihydroacridin-1(2H)-one (Table 1, entry 14)



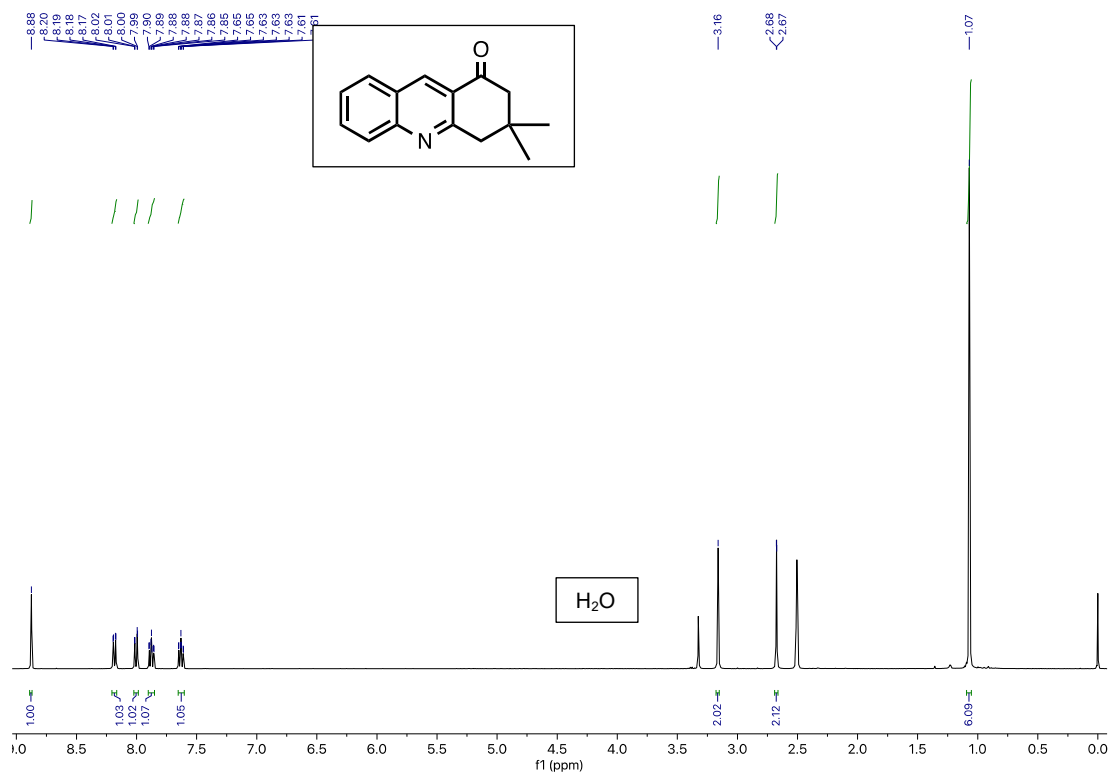

**3.3.14. <sup>13</sup>C NMR for 3,3-Dimethyl-3,4-dihydroacridin-1(2H)-one (Table 1, entry 14)**

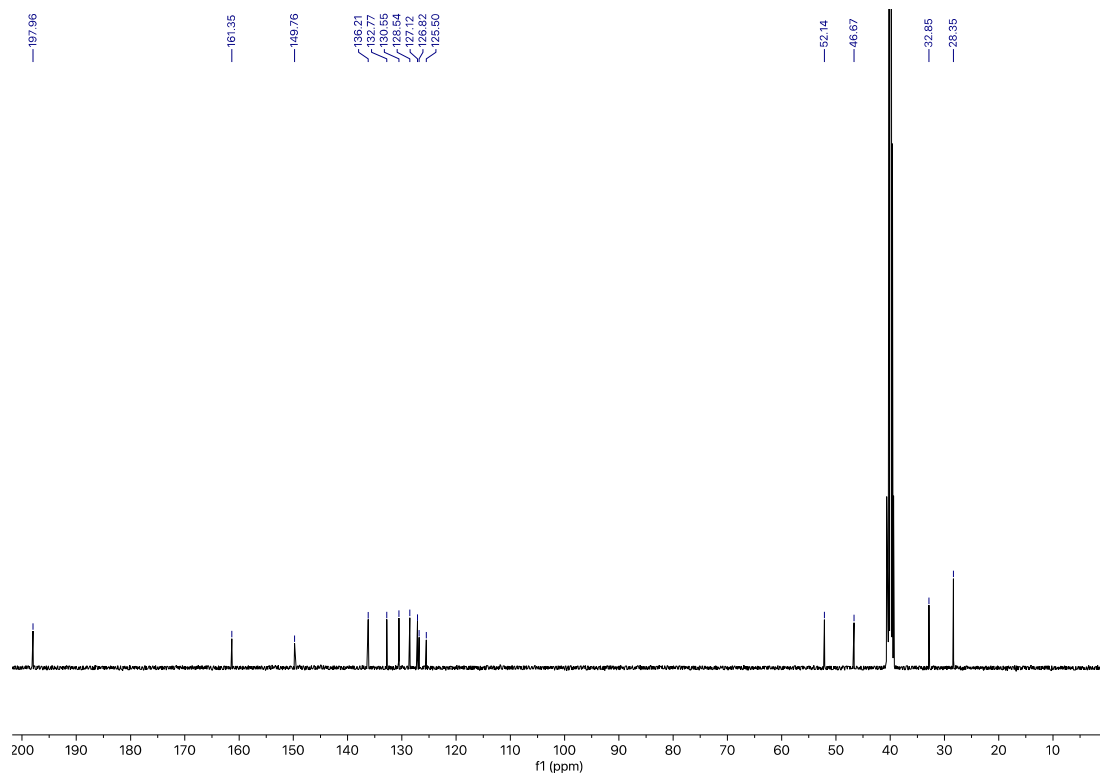

**3.3.15. <sup>1</sup>H NMR for 1-(2-Methylquinolin-3-yl)ethan-1-one (Table 1, entry 15)**

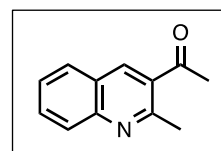

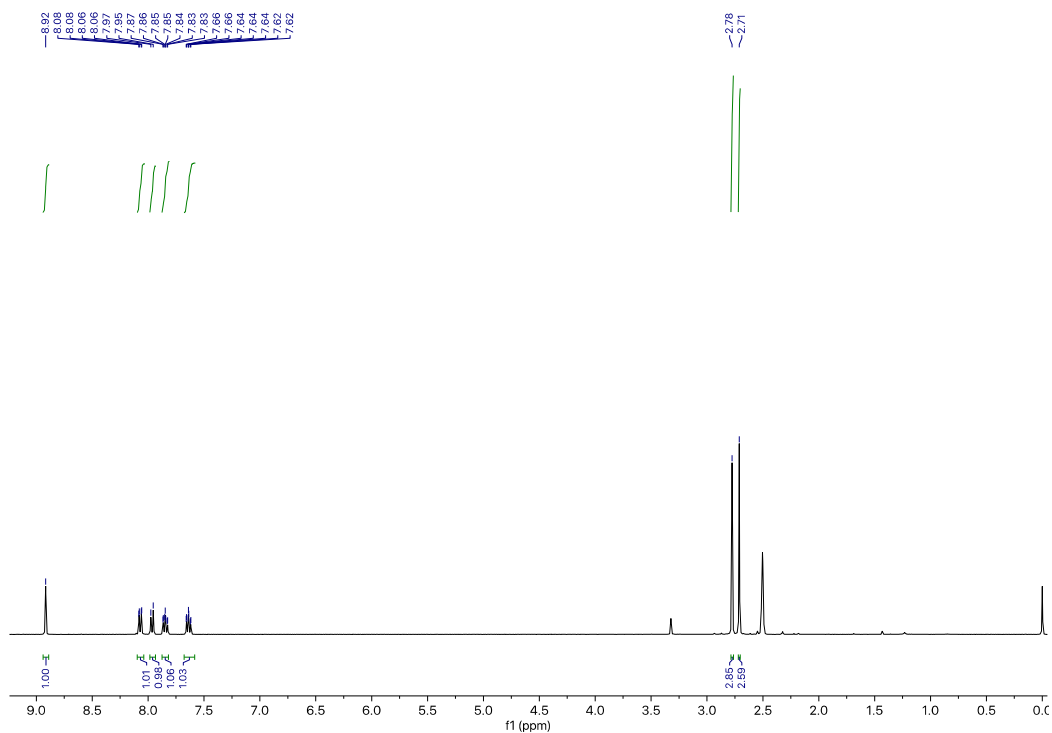

### 3.3.15. <sup>13</sup>C NMR for 1-(2-Methylquinolin-3-yl)ethan-1-one (Table 1, entry 15)

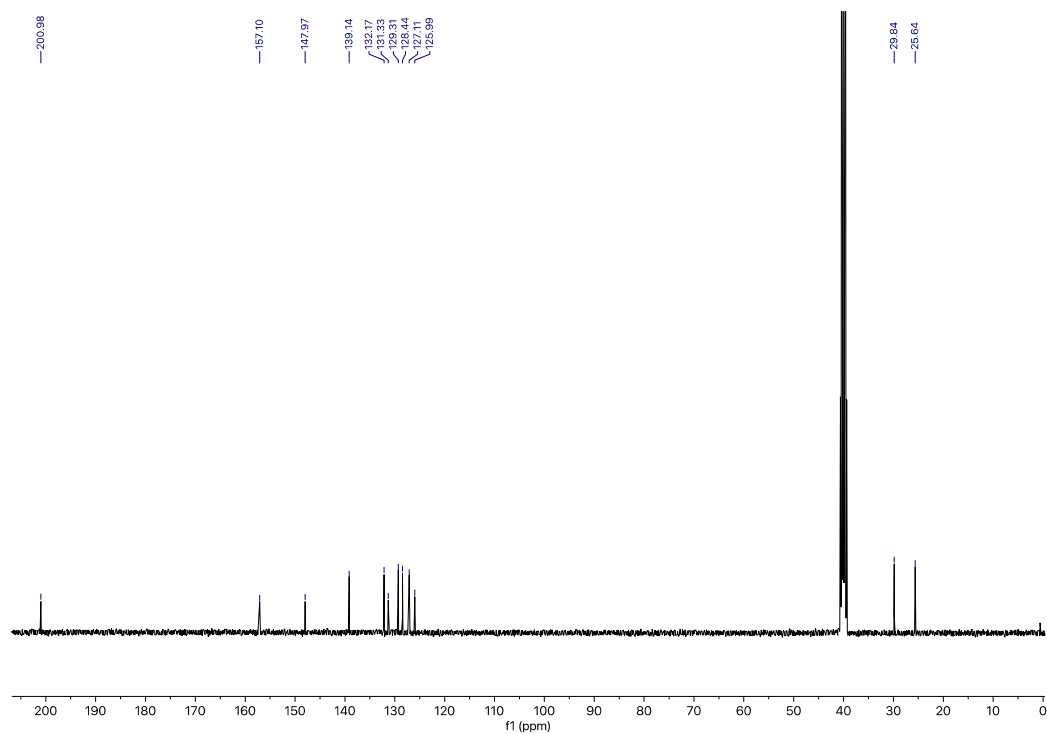

### 3.3.16. <sup>1</sup>H NMR for (2-Methylquinolin-3-yl)(phenyl)methanone (Table 1, entry 16)

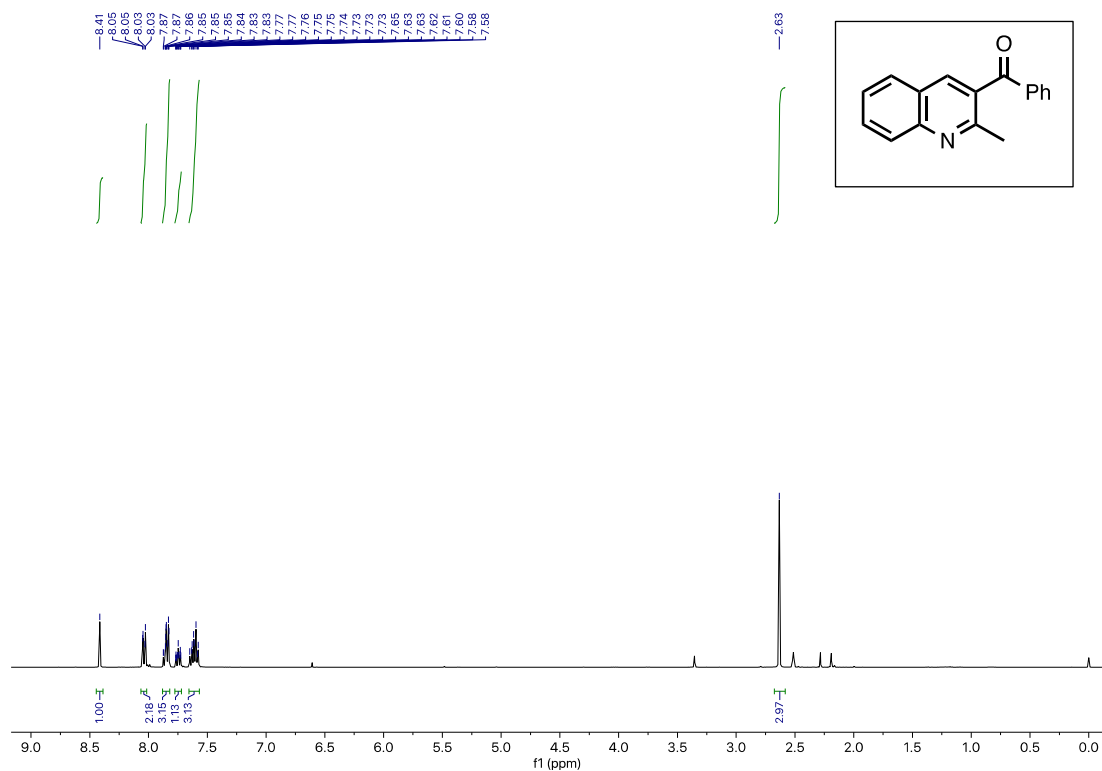

### 3.3.16. <sup>13</sup>C NMR for (2-Methylquinolin-3-yl)(phenyl)methanone (Table 1, entry 16)

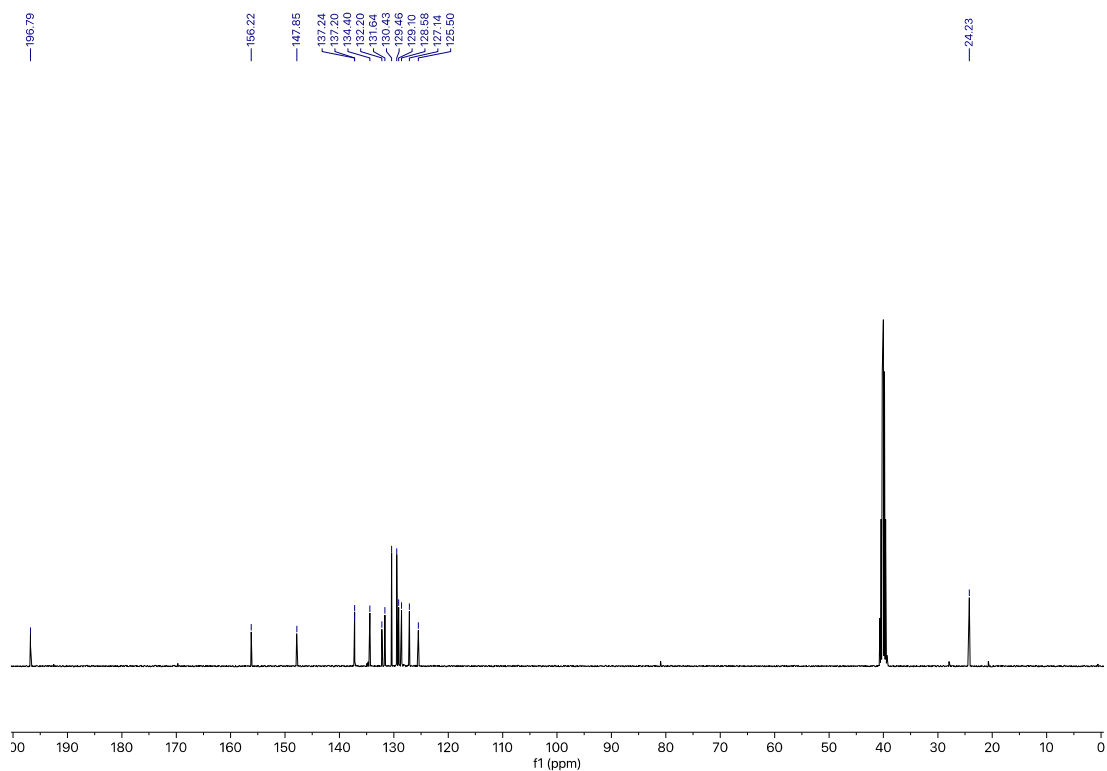

### 3.3.17. <sup>1</sup>H NMR for 2-Methyl-3-phenylquinoline (Table 1, entry 17)

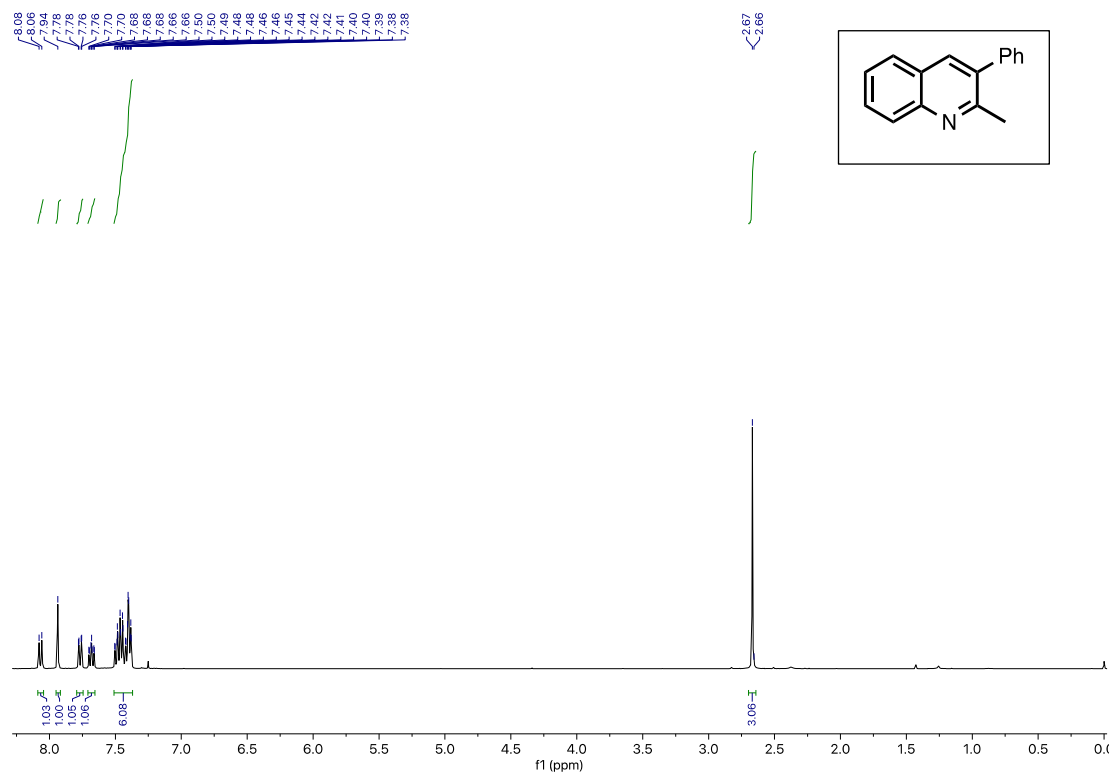

### 3.3.17. <sup>13</sup>C NMR for 2-Methyl-3-phenylquinoline (Table 1, entry 17)

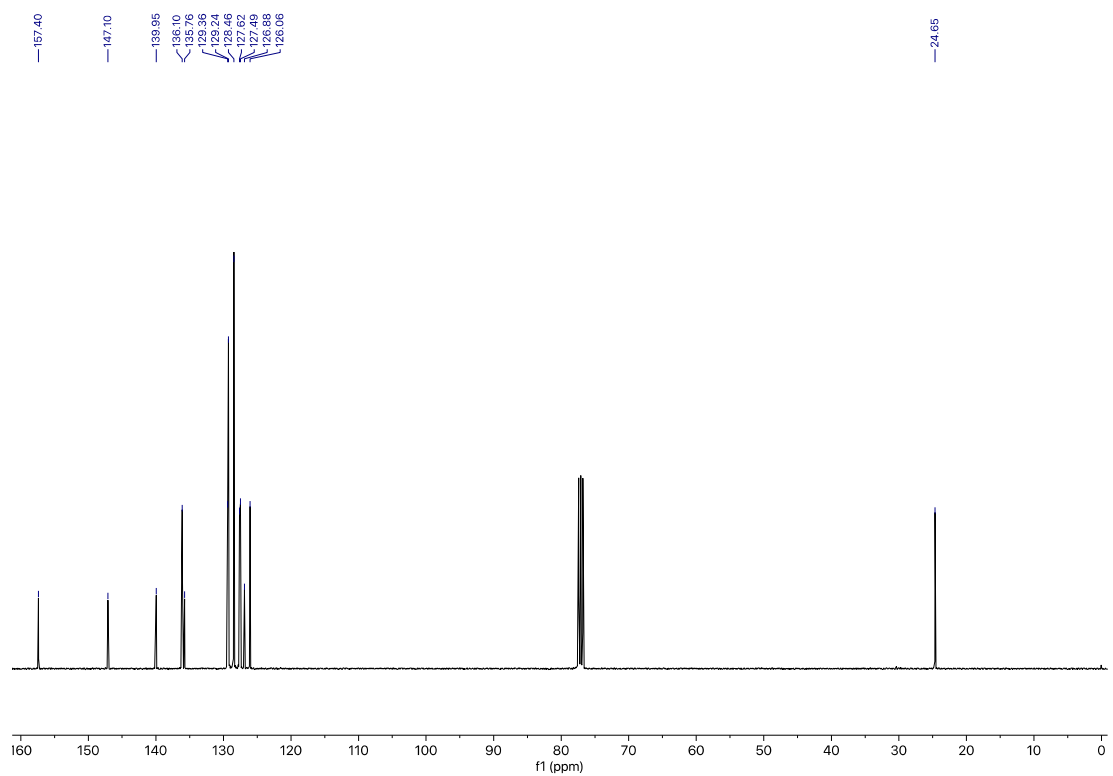

### 3.3.18. <sup>1</sup>H NMR for 2,3-Diphenylquinoline (Table 1, entry 18)

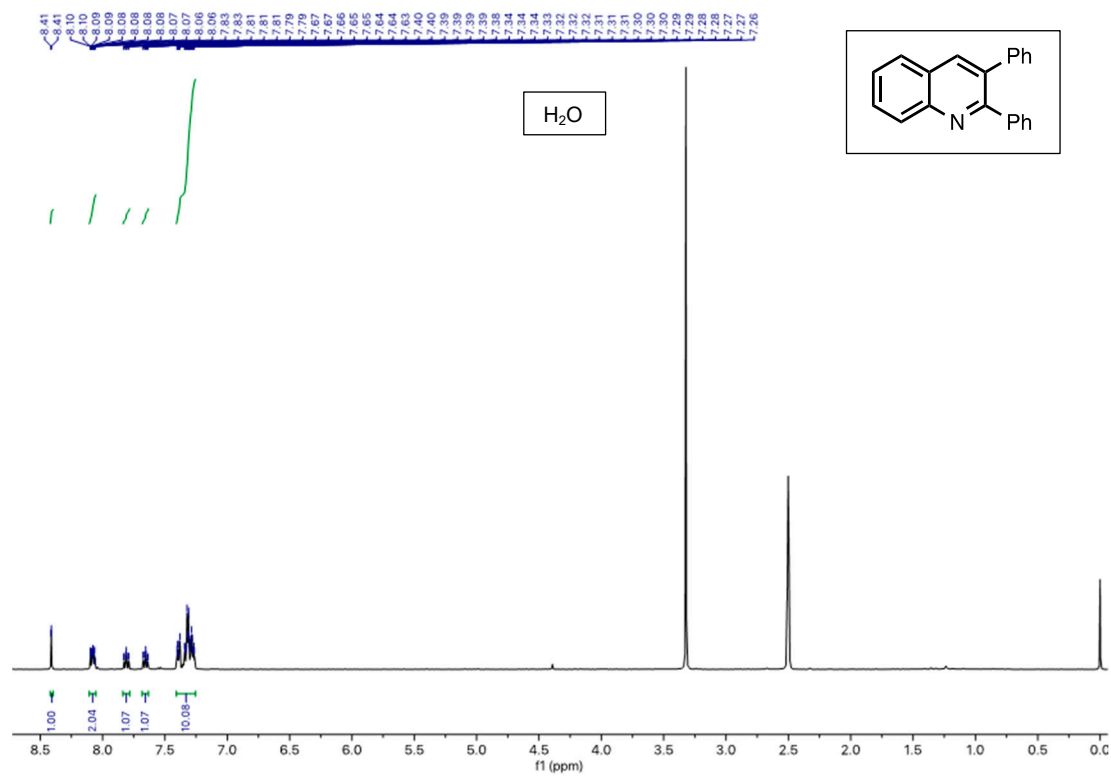

### 3.3.18. <sup>13</sup>C NMR for 2,3-Diphenylquinoline (Table 1, entry 18)

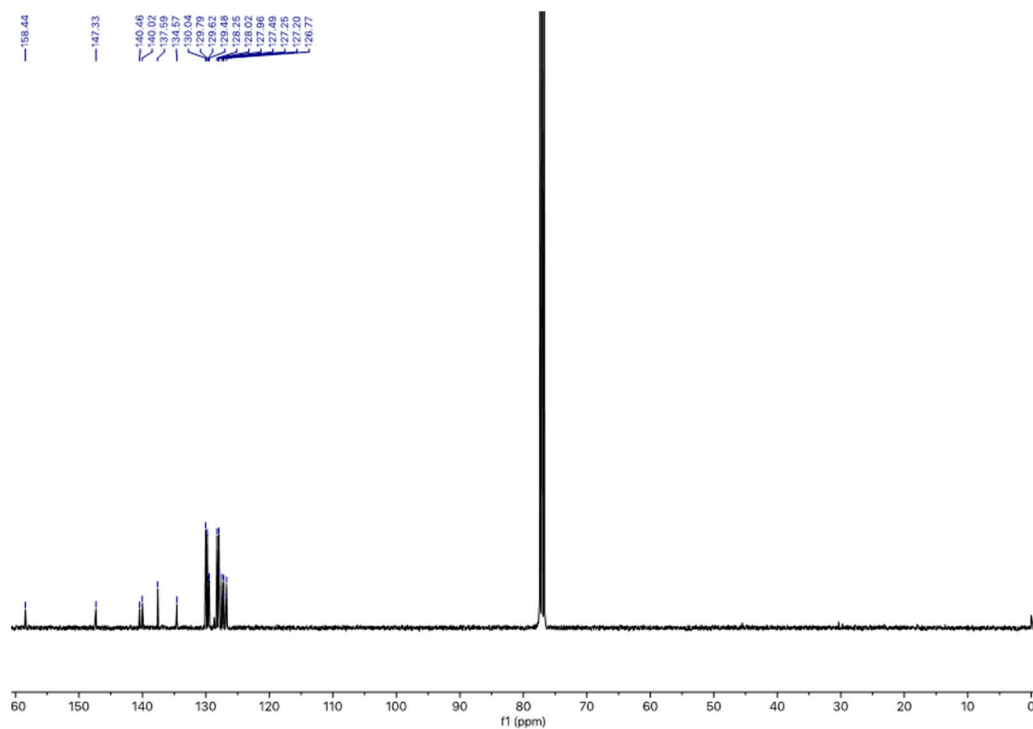

### 3.3.19. <sup>1</sup>H NMR for 5,6-Dihydrobenzo[*a*]acridine (Table 1, entry 19)

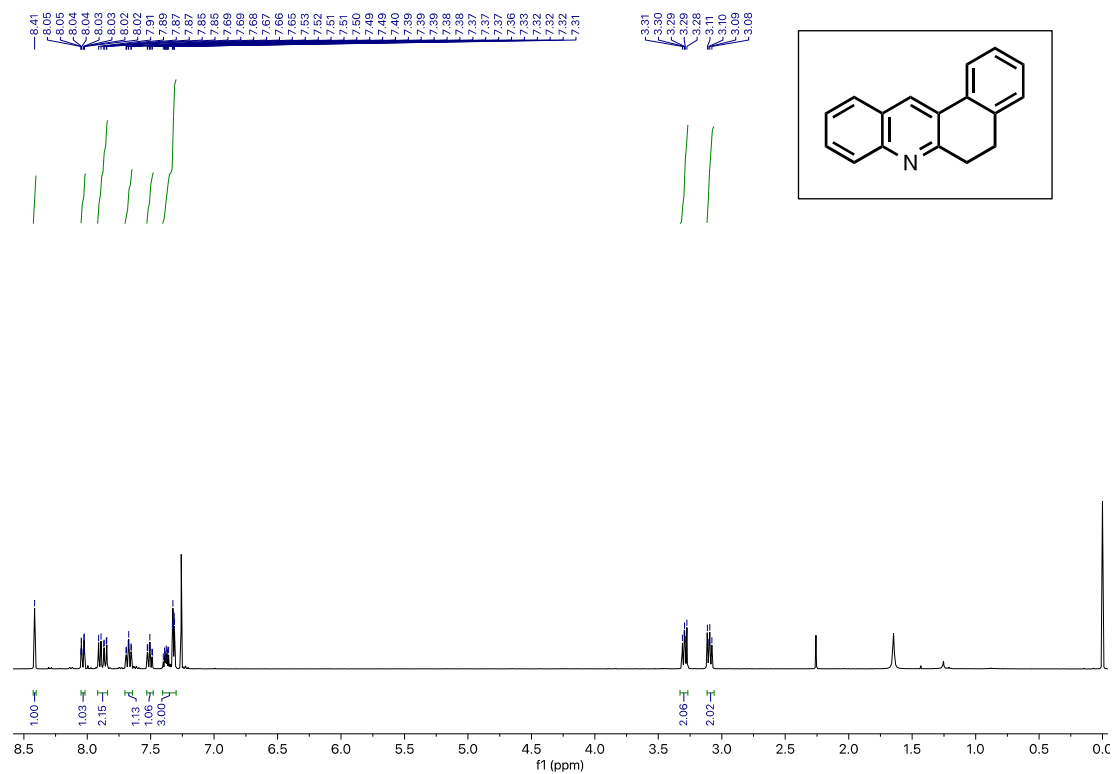

### 3.3.19. <sup>13</sup>C NMR for 5,6-Dihydrobenzo[*a*]acridine (Table 1, entry 19)

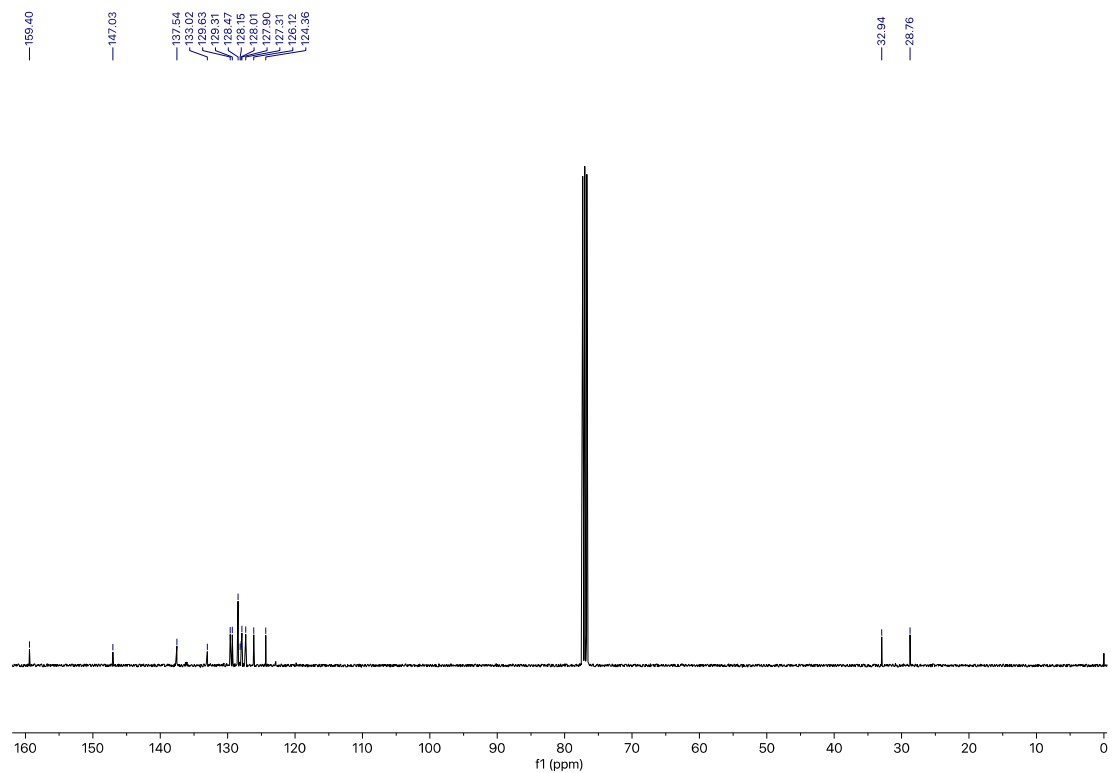

### 3.4.1. <sup>1</sup>H NMR for Ethyl 6-fluoro-2-(trifluoromethyl)quinoline-3-carboxylate (Table 2, entry 1)

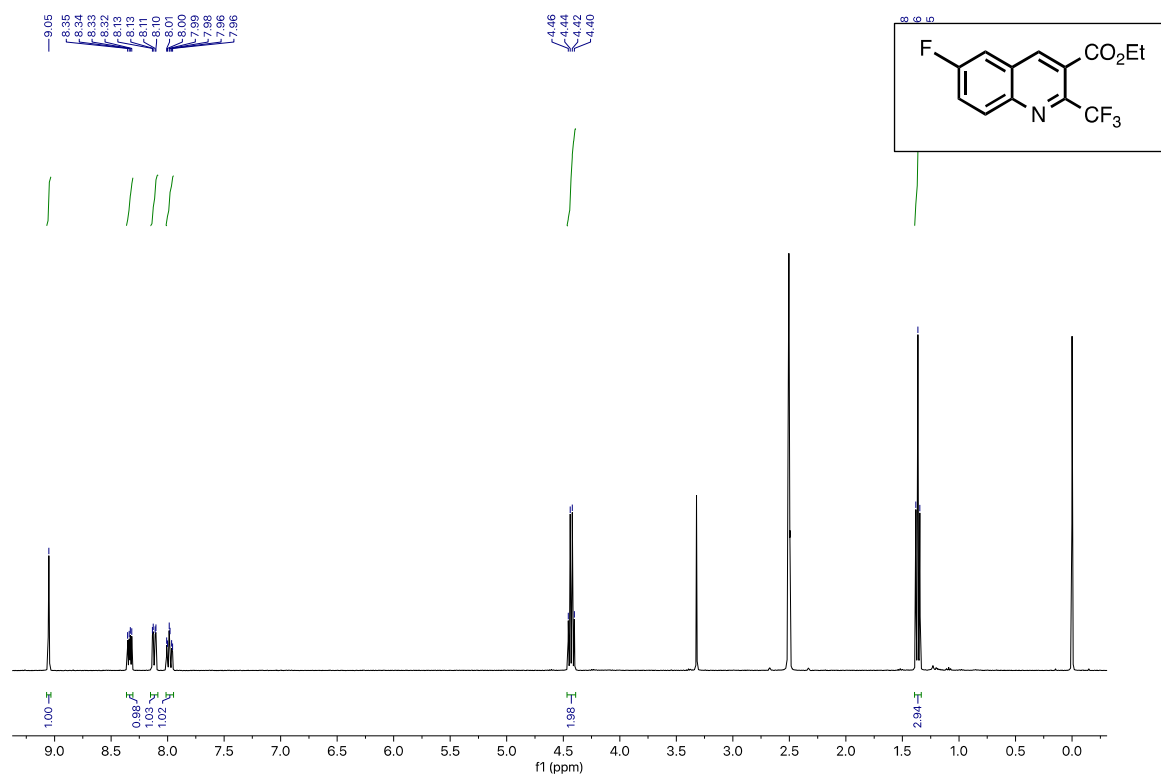

### 3.4.1. <sup>13</sup>C NMR for Ethyl 6-fluoro-2-(trifluoromethyl)quinoline-3-carboxylate (Table 2, entry 1)

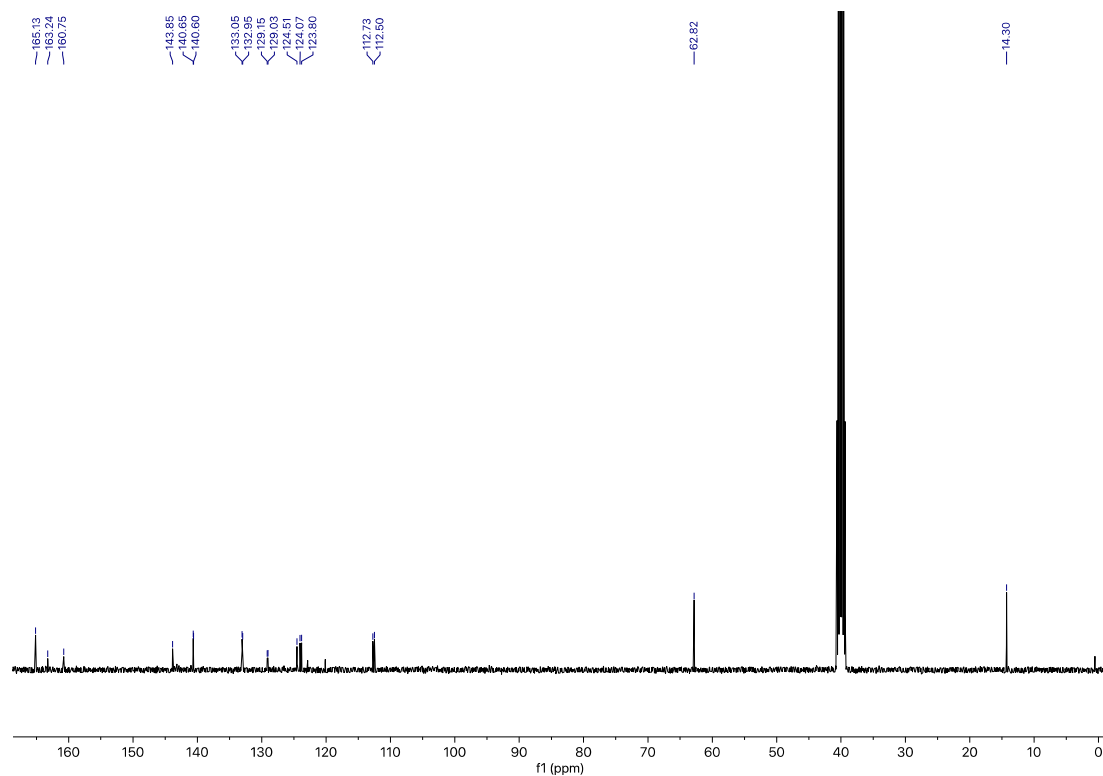

### 3.4.2. <sup>1</sup>H NMR for Methyl 6-fluoro-2-isopropylquinoline-3-carboxylate (Table 2, entry 2)

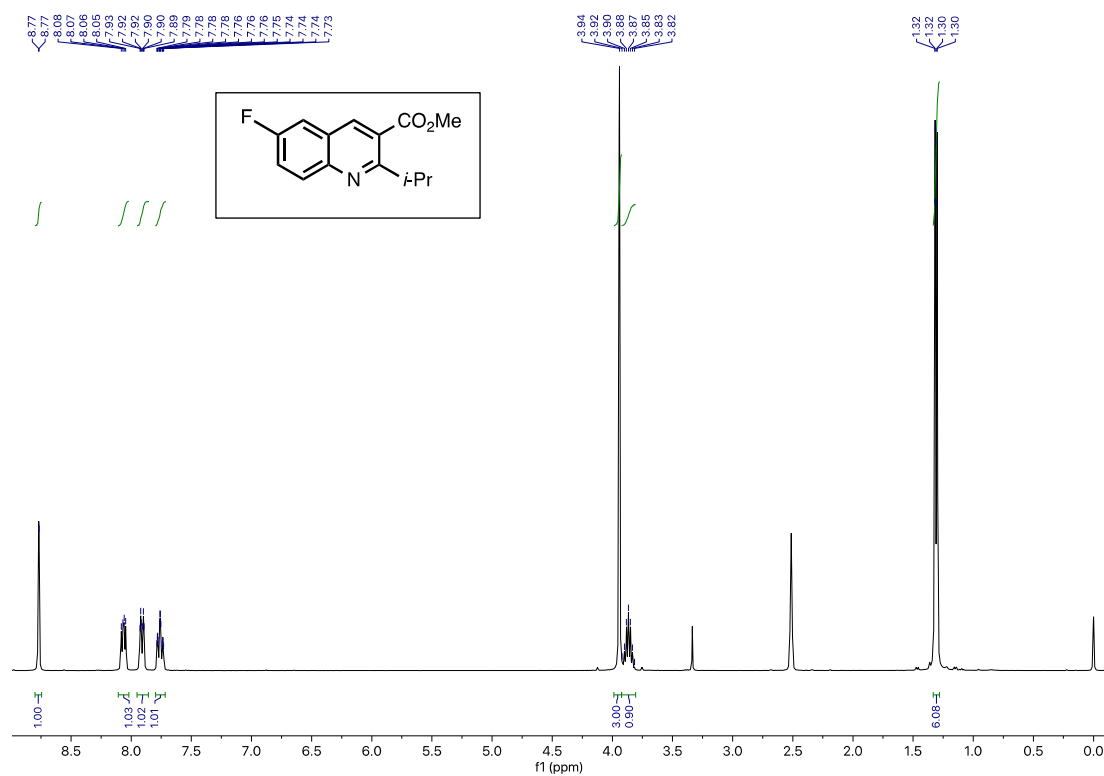

### 3.4.2. <sup>13</sup>C NMR for Methyl 6-fluoro-2-isopropylquinoline-3-carboxylate (Table 2, entry 2)

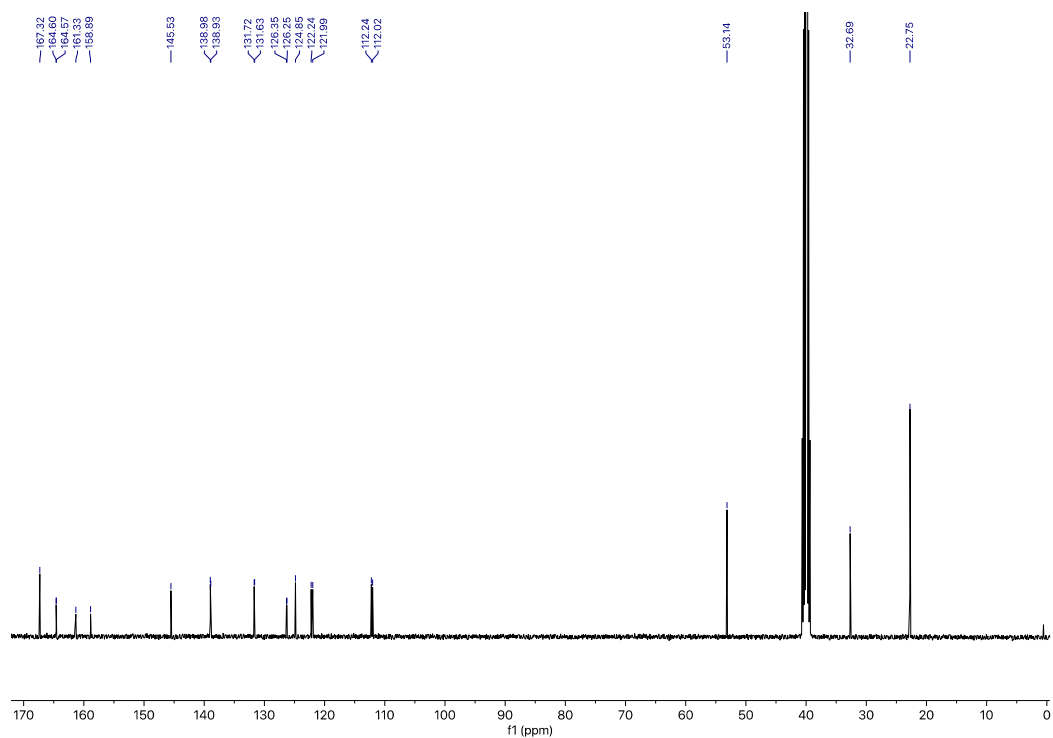

### 3.4.3. <sup>1</sup>H NMR for Ethyl 6-fluoro-2-phenylquinoline-3-carboxylate (Table 2, entry 3)



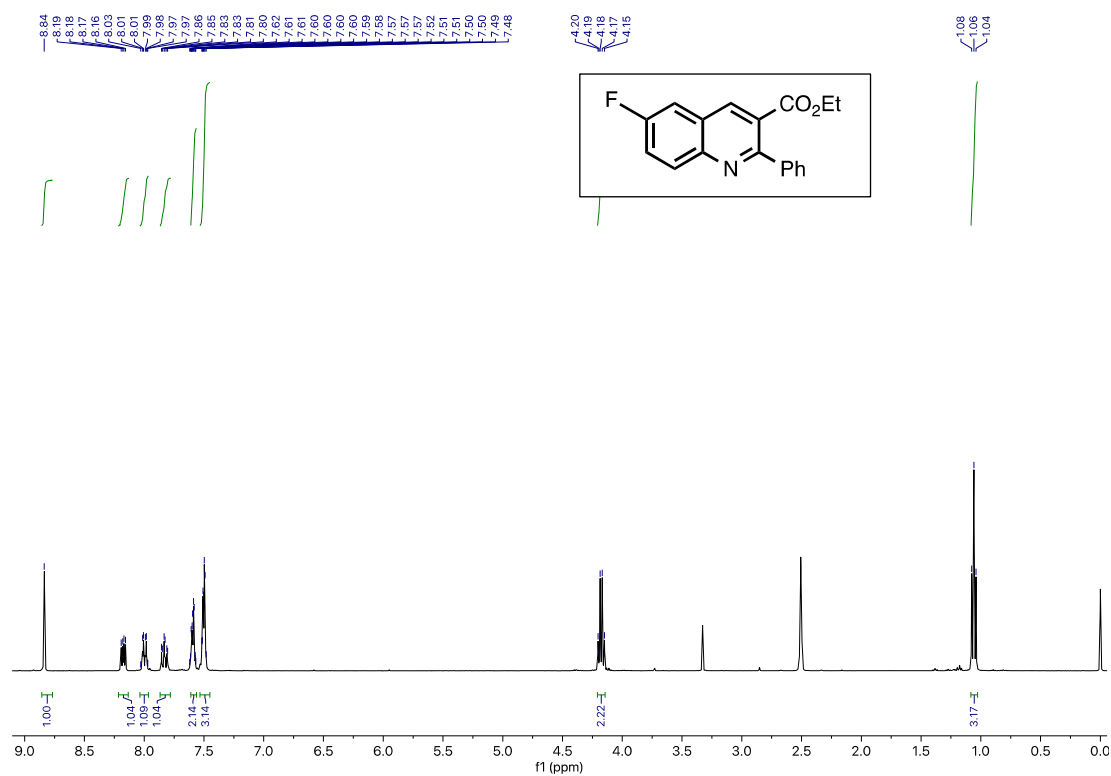

### 3.4.3. <sup>13</sup>C NMR for Ethyl 6-fluoro-2-phenylquinoline-3-carboxylate (Table 2, entry 3)

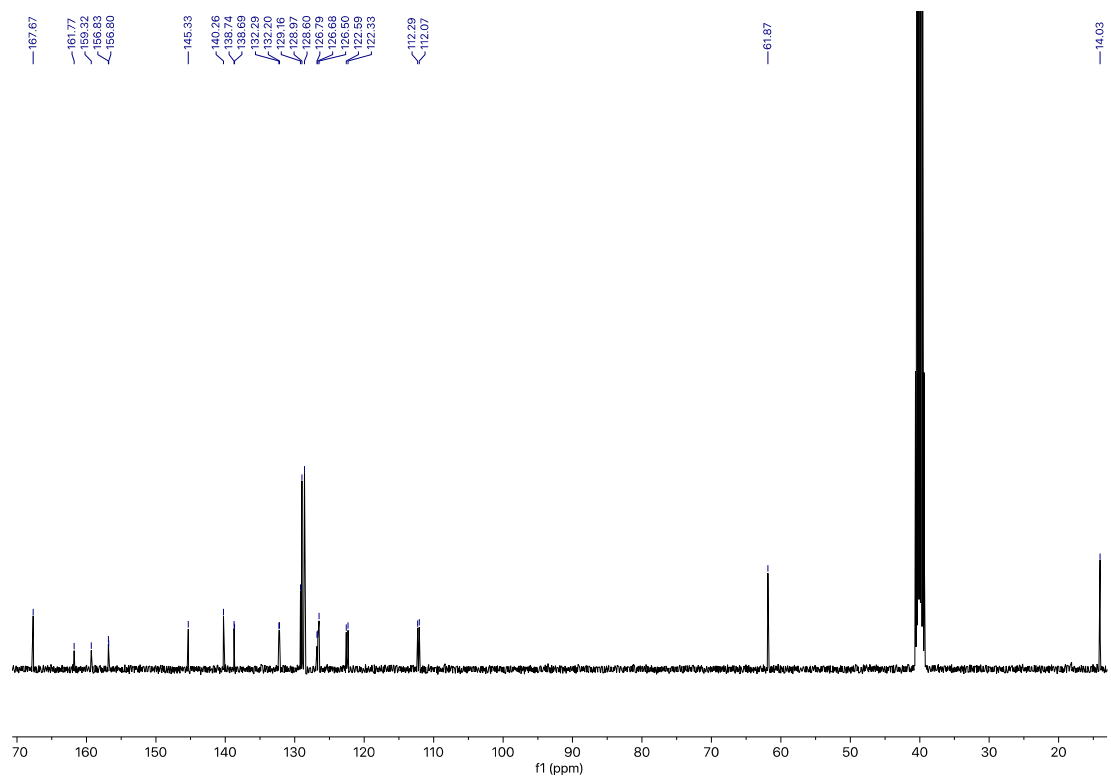

### 3.4.4. <sup>1</sup>H NMR for Methyl 2-benzyl-6-fluoroquinoline-3-carboxylate (Table 2, entry 4)

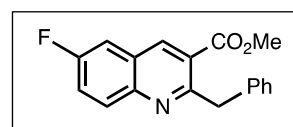

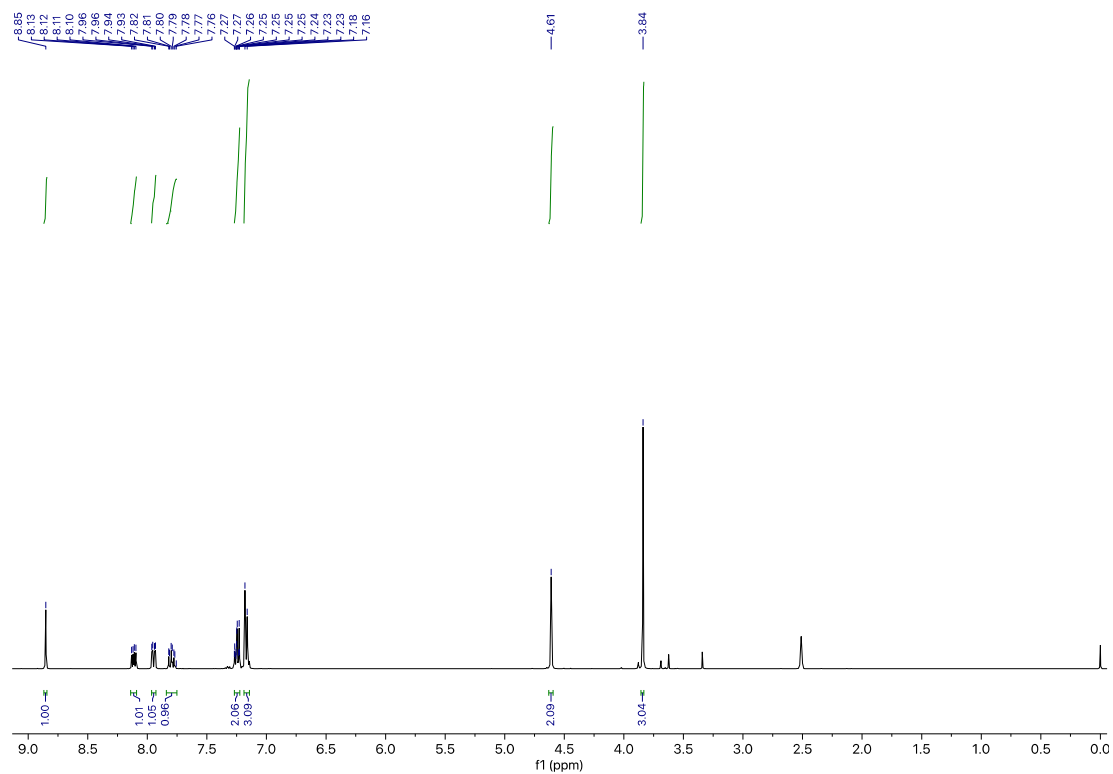

#### 3.4.4. <sup>13</sup>C NMR for Methyl 2-benzyl-6-fluoroquinoline-3-carboxylate (Table 2, entry 4)

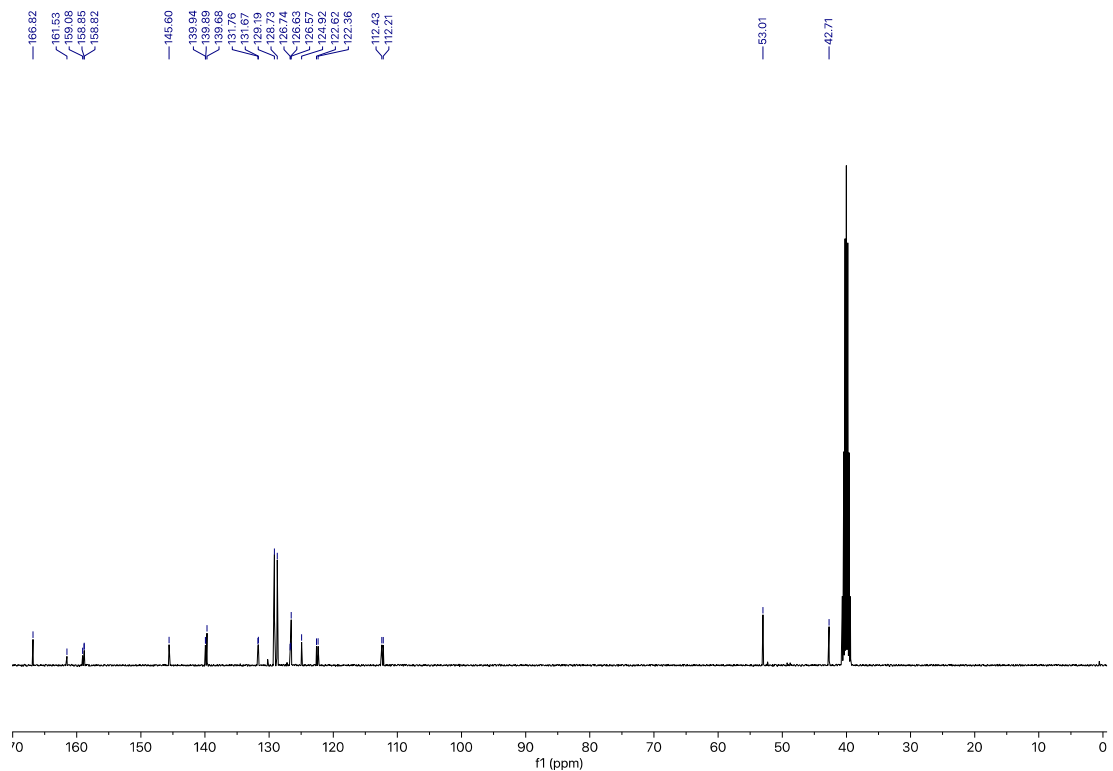

#### 3.4.5. <sup>1</sup>H NMR for 6-Fluoro-2-methyl-3-(phenylsulfonyl)quinoline (Table 2, entry 5)

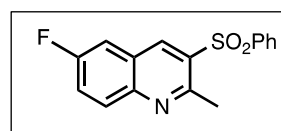

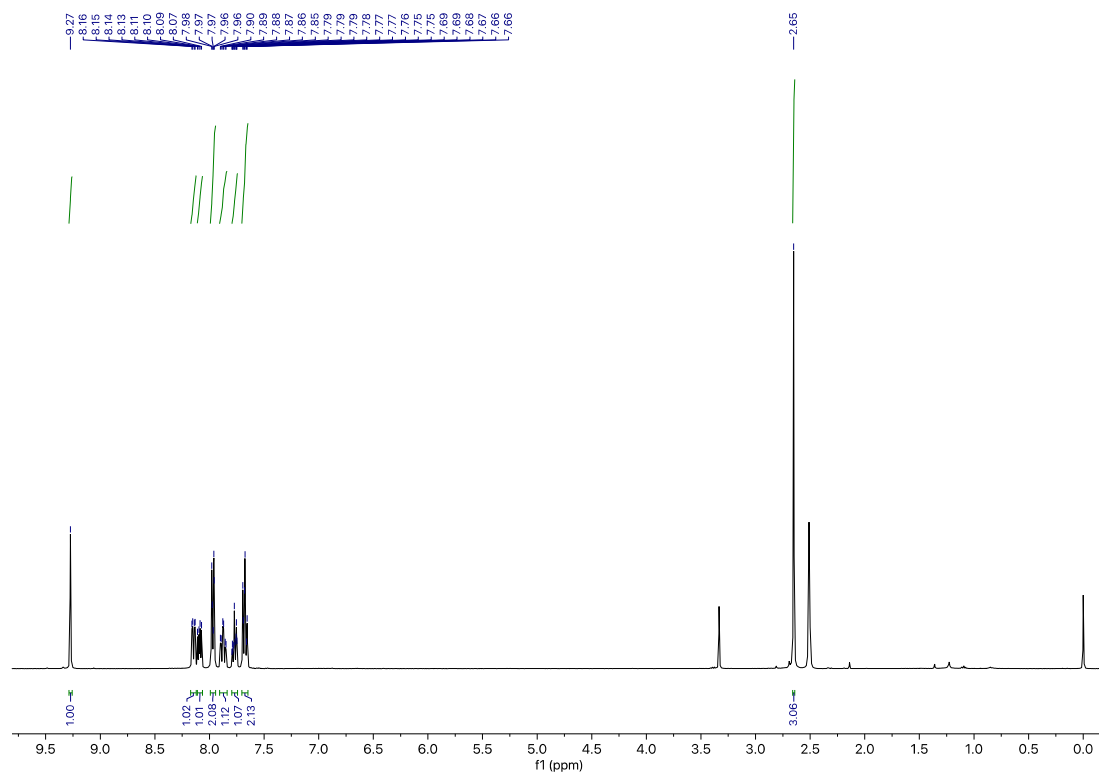

### 3.4.5. <sup>13</sup>C NMR for 6-Fluoro-2-methyl-3-(phenylsulfonyl)quinoline (Table 2, entry 5)

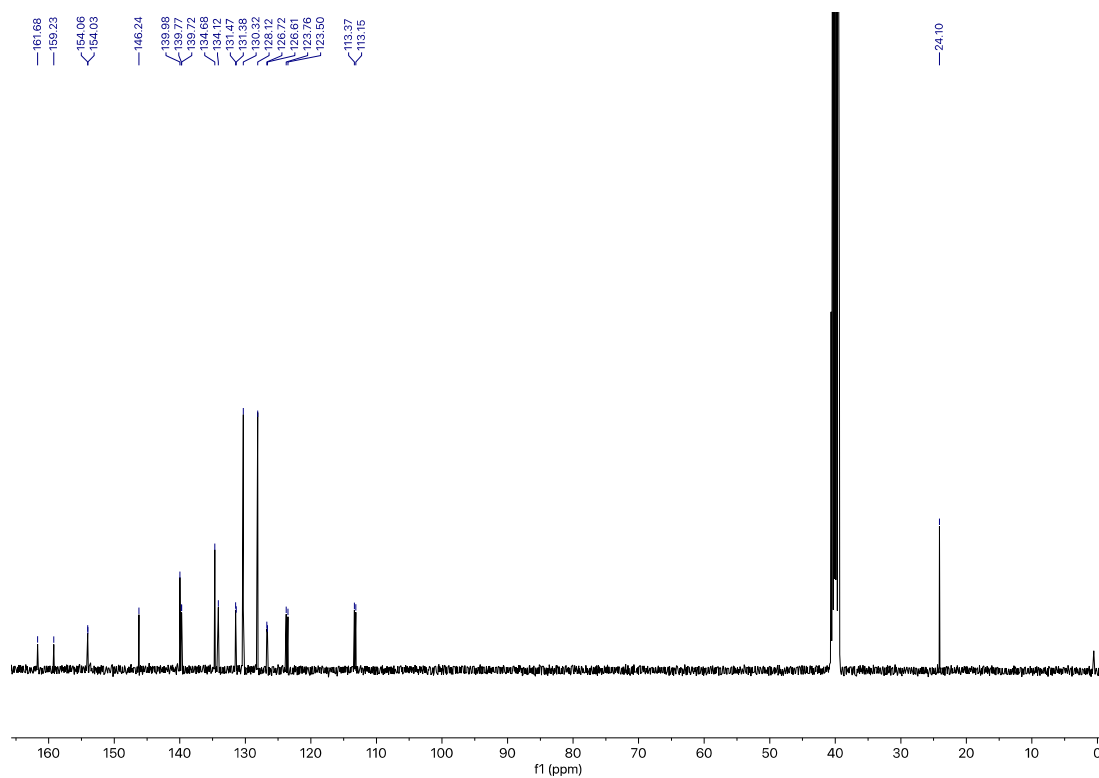

### 3.4.6. <sup>1</sup>H NMR for 6-Fluoro-2-phenylquinoline-3-carbonitrile (Table 2, entry 6)

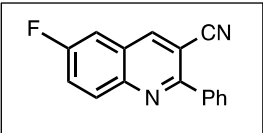

H<sub>2</sub>O

### 3.4.6. <sup>13</sup>C NMR for 6-Fluoro-2-phenylquinoline-3-carbonitrile (Table 2, entry 6)

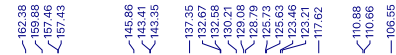

3.4.7. <sup>1</sup>H NMR for 7-Fluoro-3,3-dimethyl-3,4-dihydroacridine-1(2*H*)-one (Table 2, entry 7)

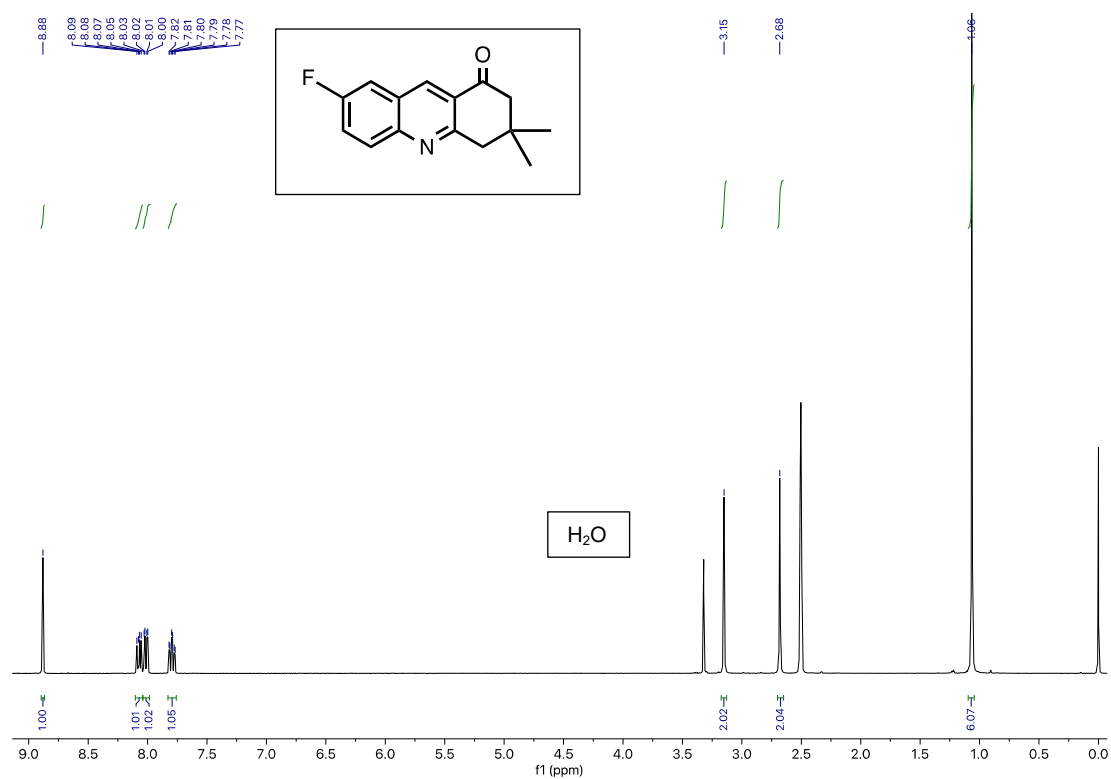

### 3.4.7. <sup>13</sup>C NMR for 7-Fluoro-3,3-dimethyl-3,4-dihydroacridin-1(2H)-one (Table 2, entry 7)

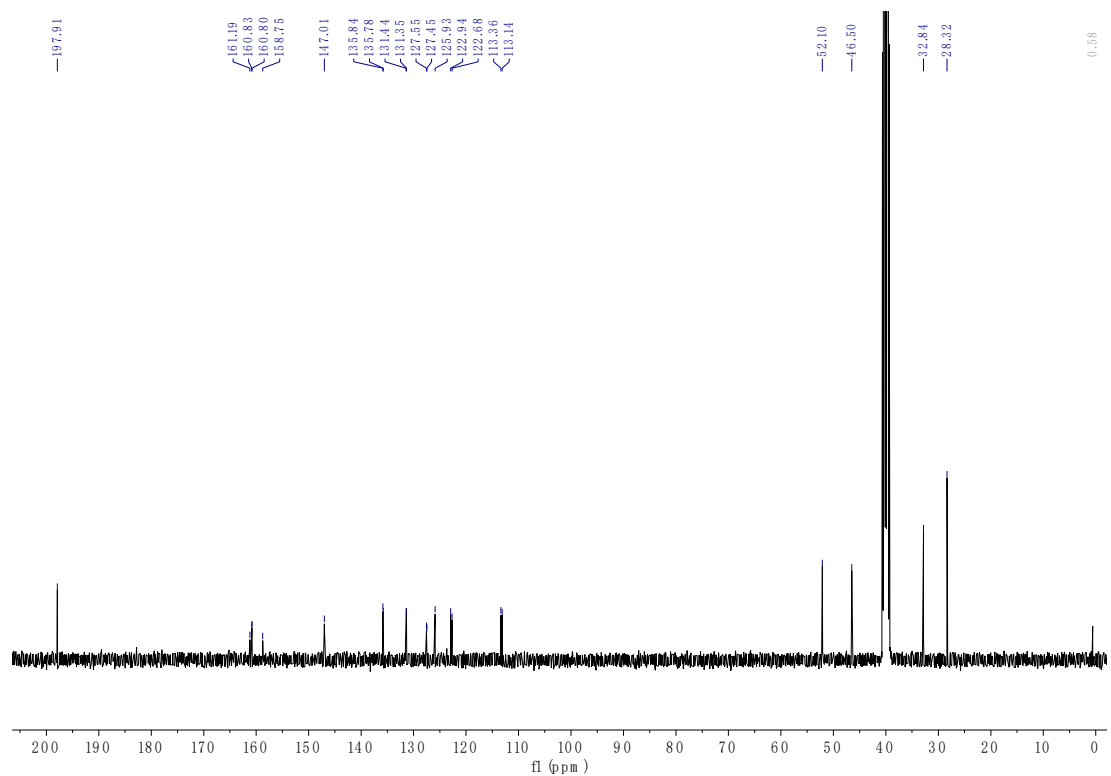

### 3.5.1. <sup>1</sup>H NMR for Ethyl 6-methoxy-2-(trifluoromethyl)quinoline-3-carboxylate (Table 3, entry 1)

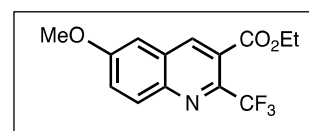

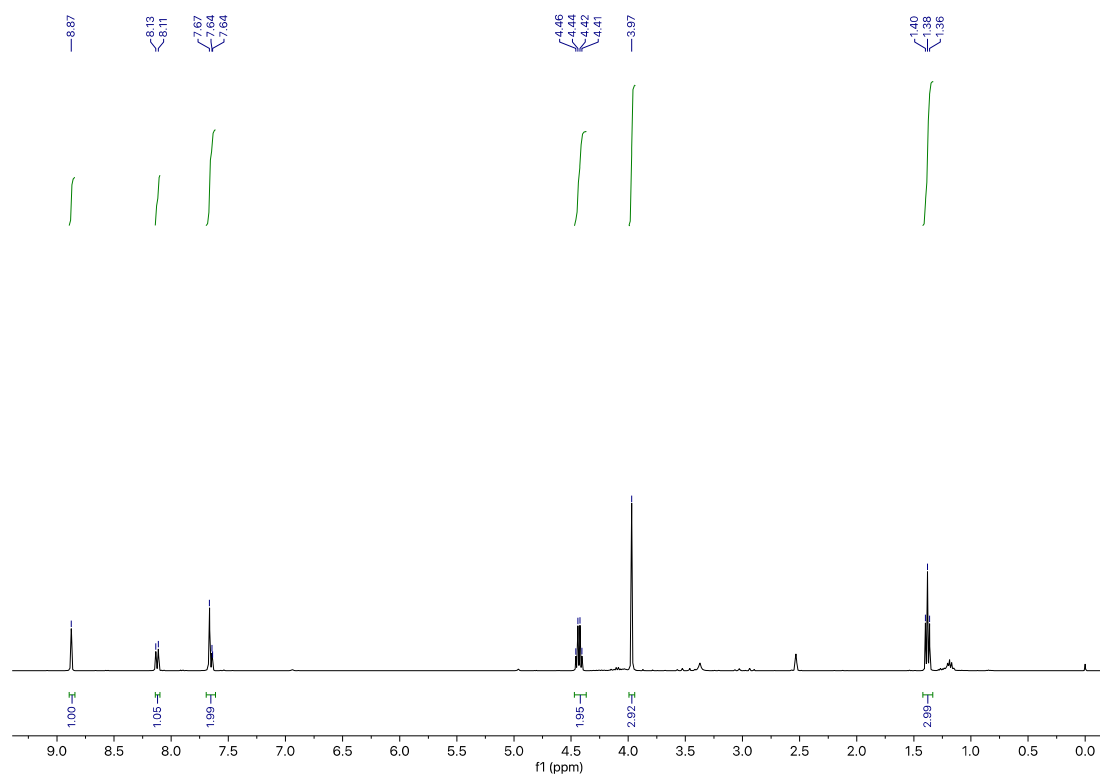

### 3.5.1. <sup>13</sup>C NMR for Ethyl 6-methoxy-2-(trifluoromethyl)quinoline-3-carboxylate (Table 3, entry 1)

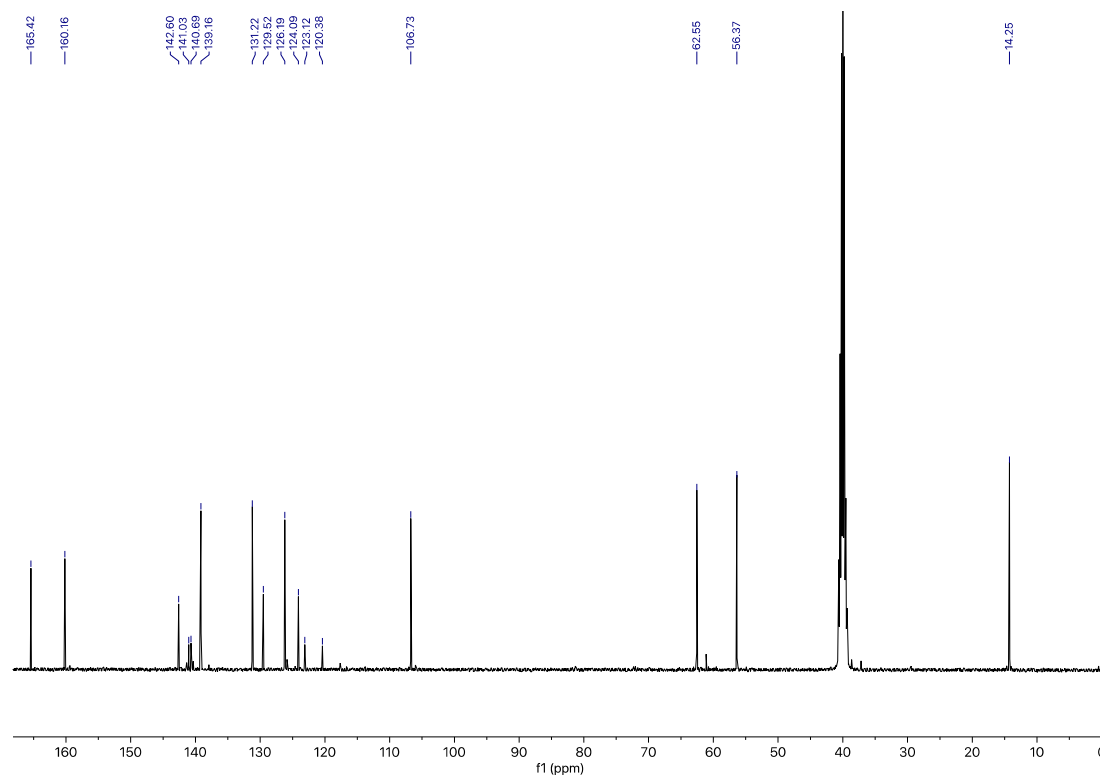

### 3.5.2. <sup>1</sup>H NMR for Methyl 2-isopropyl-6-methoxyquinoline-3-carboxylate (Table 3, entry 2)

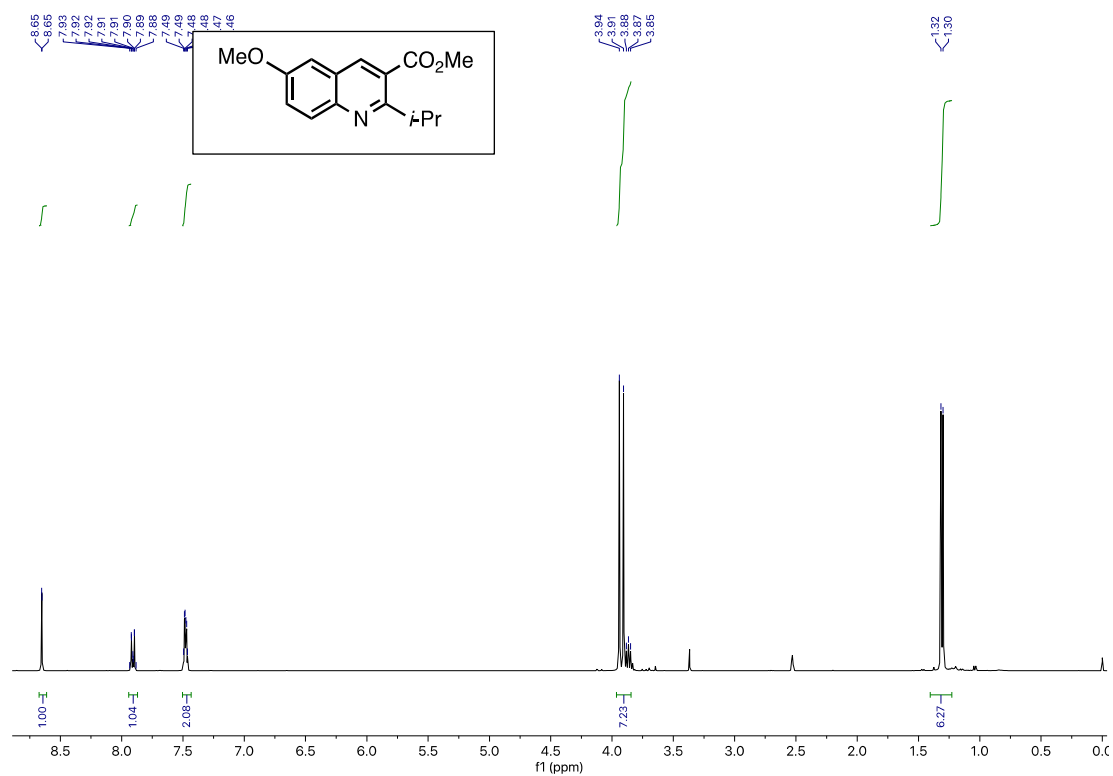

### 3.5.2. <sup>13</sup>C NMR for Methyl 2-isopropyl-6-methoxyquinoline-3-carboxylate (Table 3, entry 2)

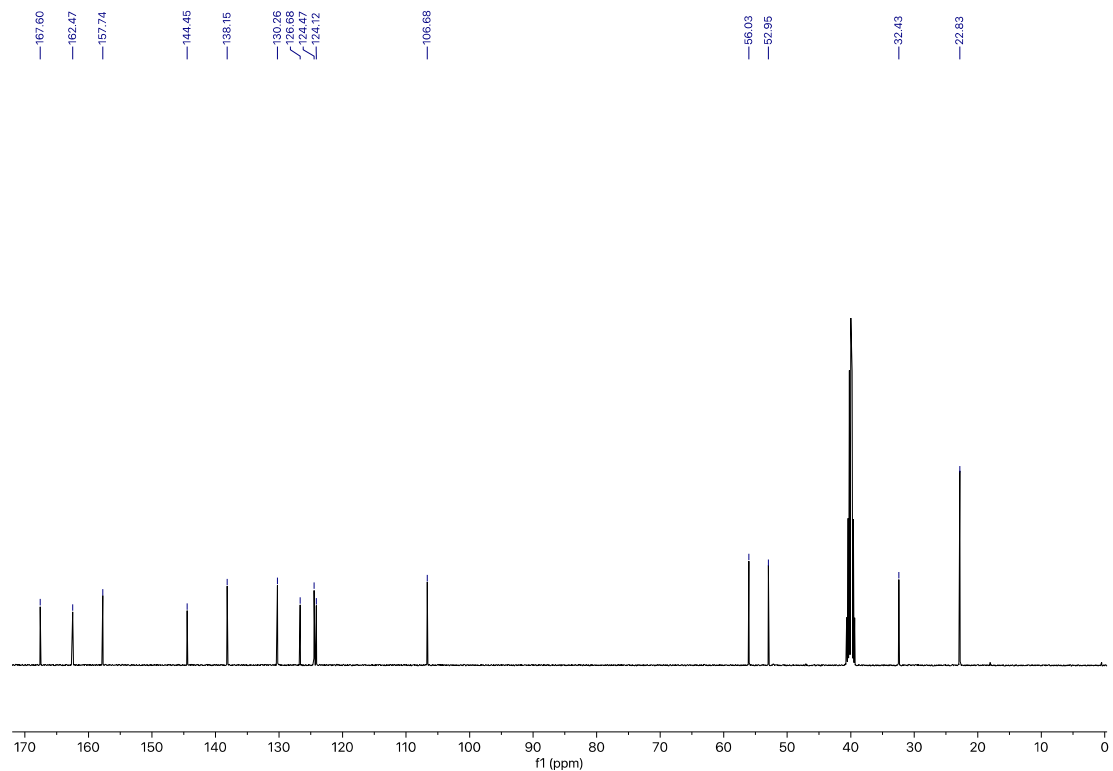

### 3.5.3. <sup>1</sup>H NMR for Ethyl 6-methoxy-2-phenylquinoline-3-carboxylate (Table 3, entry 3)

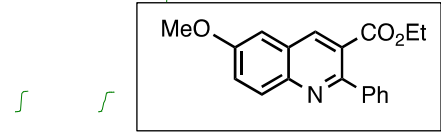

168.00  
158.34  
154.82  
144.23  
140.63  
137.80  
130.77  
129.95  
128.78  
127.16  
125.90  
124.83  
106.64  
61.66  
56.16  
14.04

f1 (ppm)

## 32



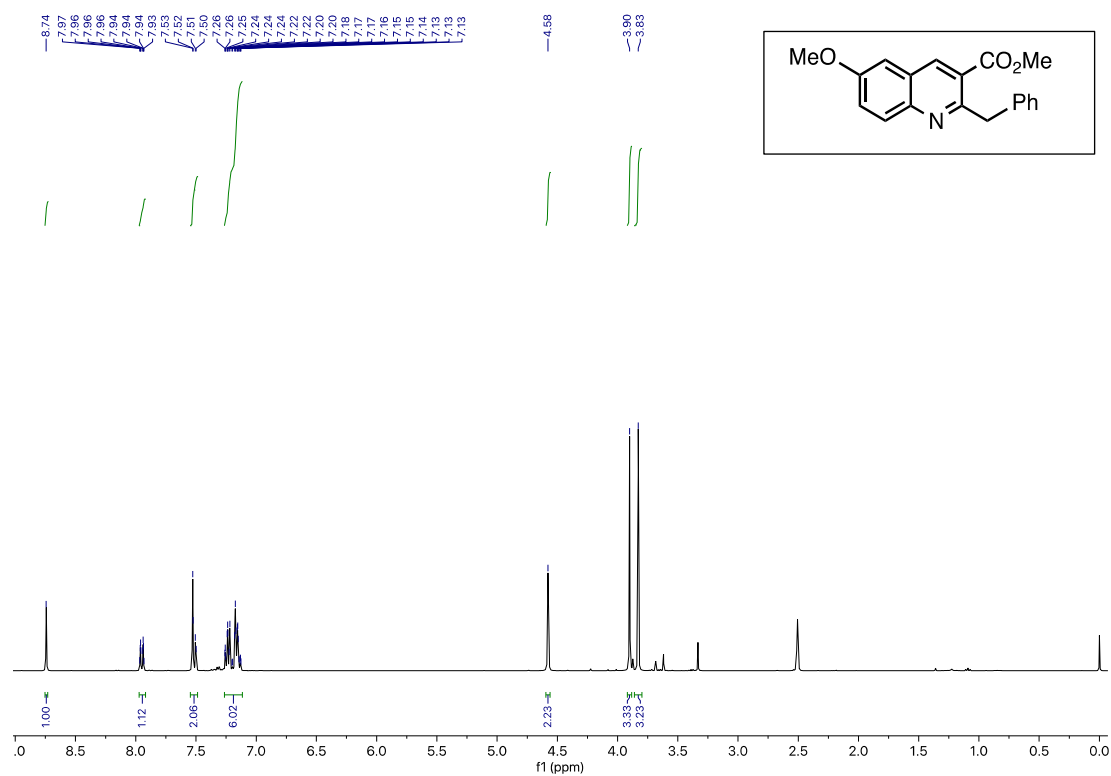

### 3.5.4. <sup>13</sup>C NMR for Methyl 2-benzyl-6-methoxyquinoline-3-carboxylate (Table 3, entry 4)

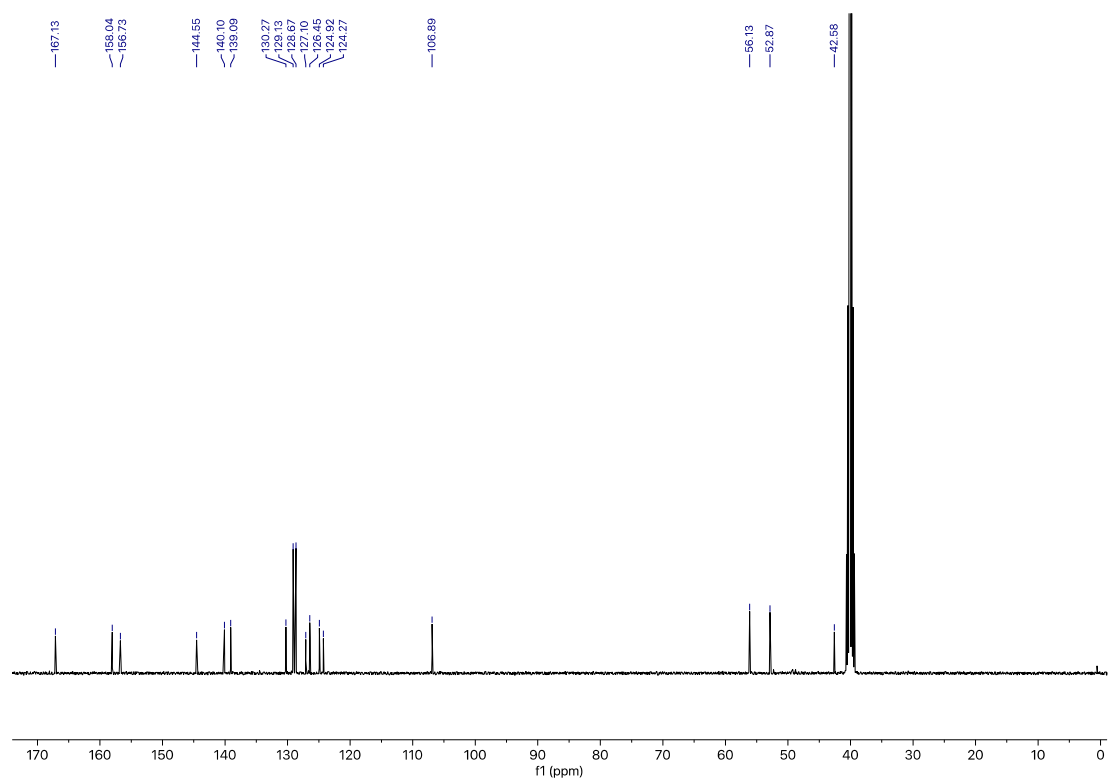

### 3.5.5. <sup>1</sup>H NMR for 6-Methoxy-2-methyl-3-(phenylsulfonyl)quinoline (Table 3, entry 5)

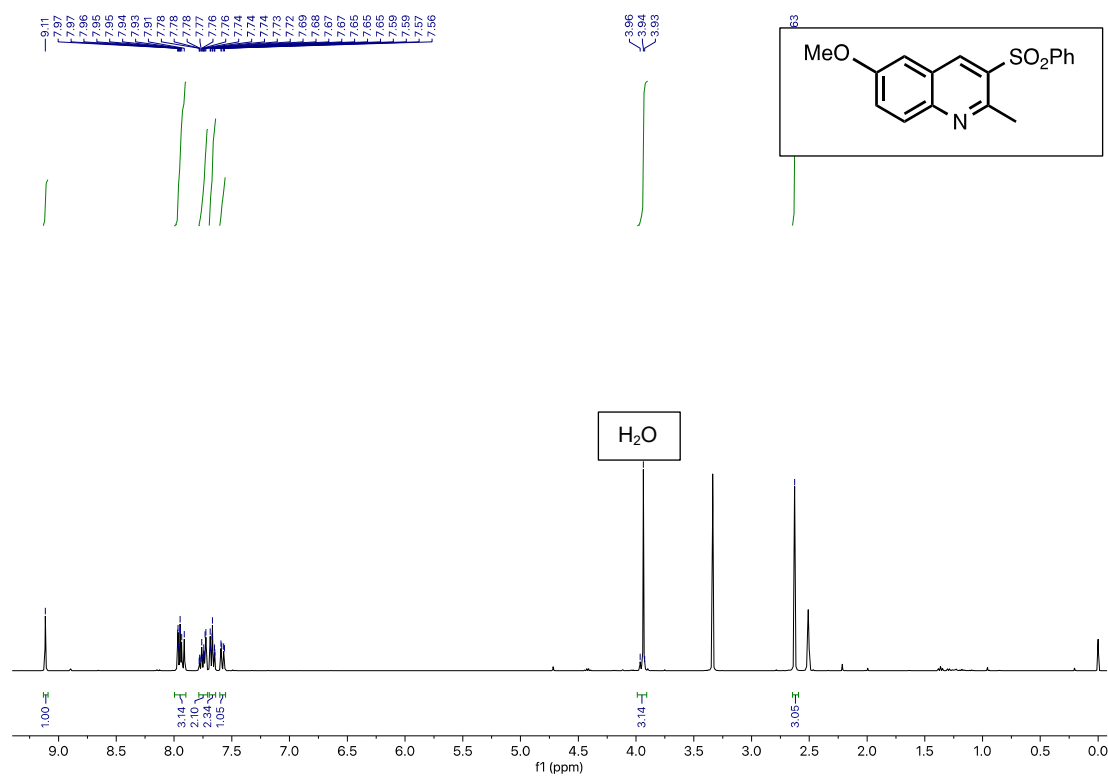

### 3.5.5. <sup>13</sup>C NMR for 6-Methoxy-2-methyl-3-(phenylsulfonyl)quinoline (Table 3, entry 5)

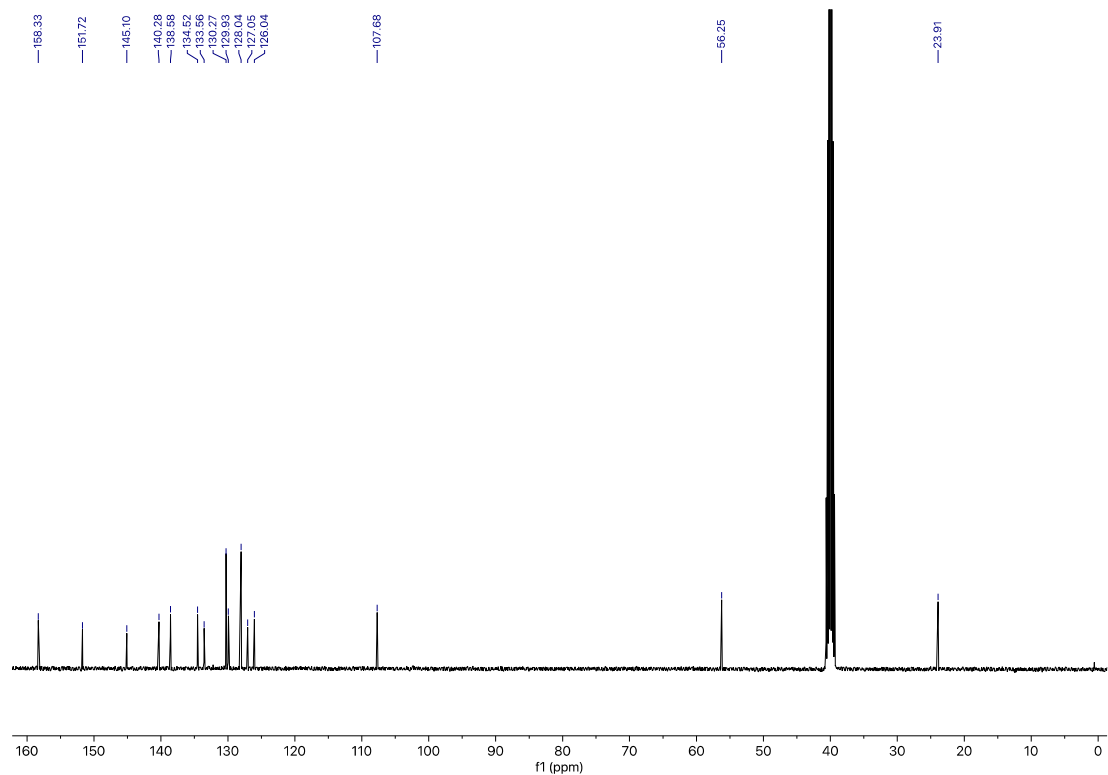

### 3.5.6. <sup>1</sup>H NMR for 6-Methoxy-2-phenylquinoline-3-carbonitrile (Table 3, entry 6)

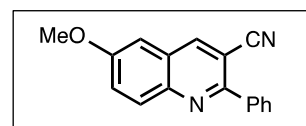

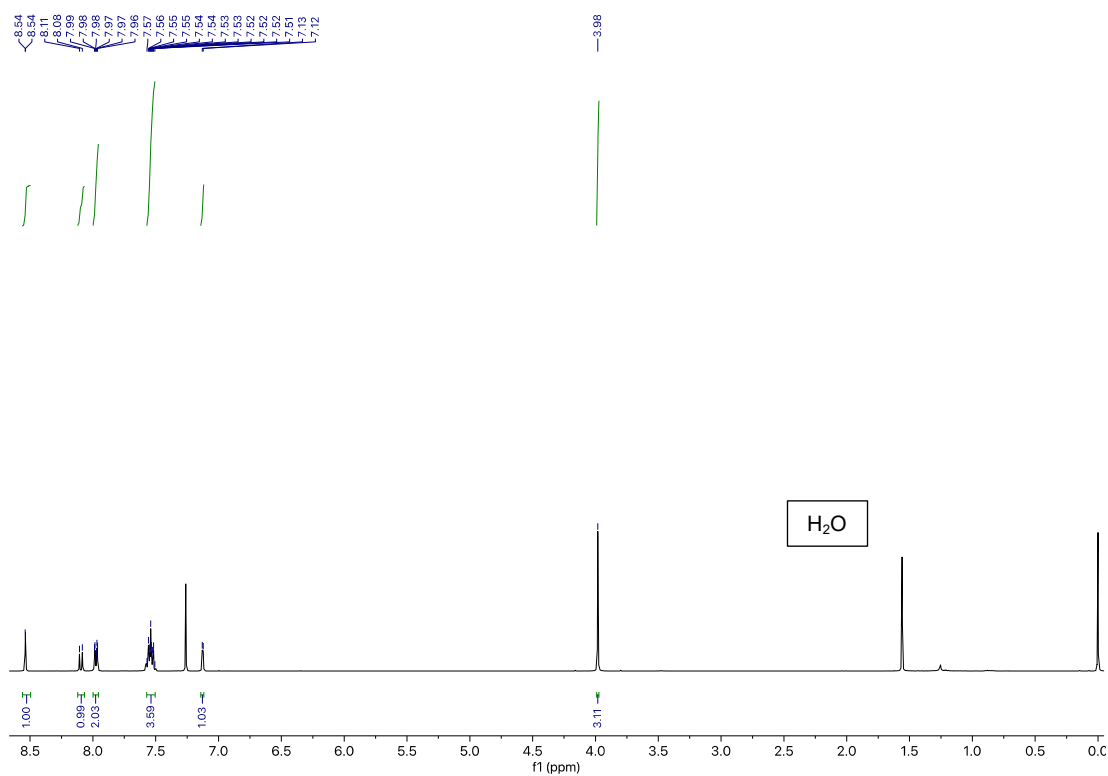

### 3.5.6. <sup>13</sup>C NMR for 6-Methoxy-2-phenylquinoline-3-carbonitrile (Table 3, entry 6)

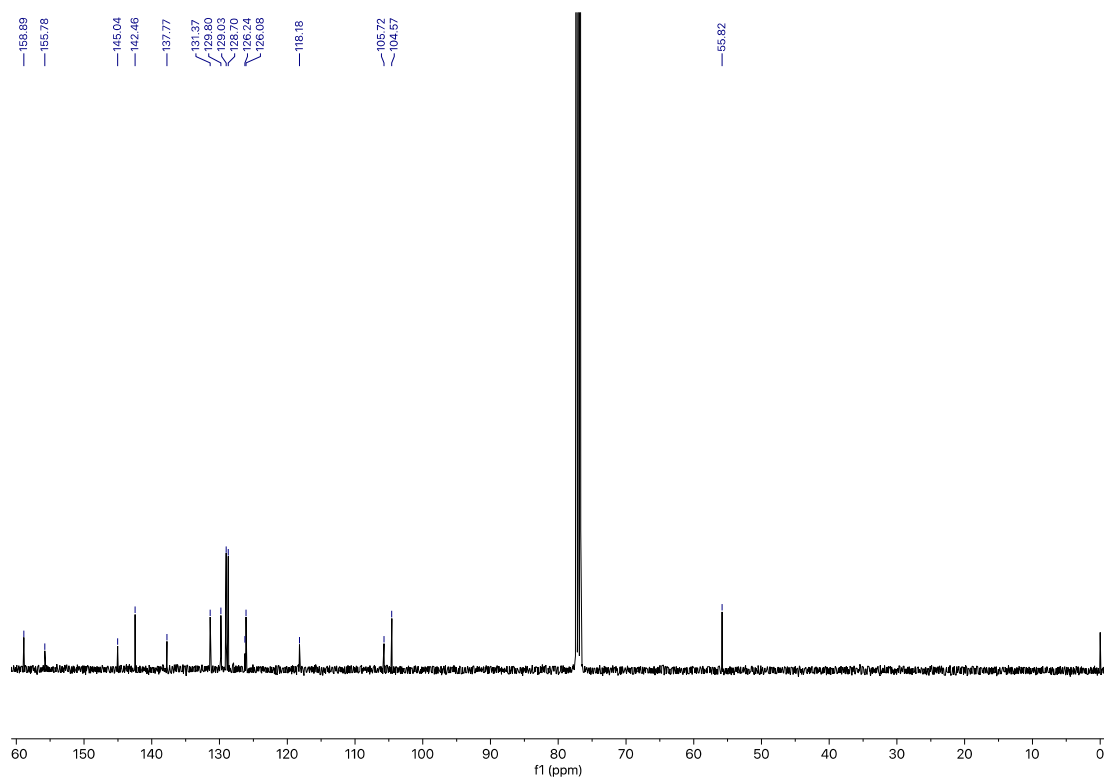

### 3.5.7. <sup>1</sup>H NMR for 7-Methoxy-3,3-dimethyl-3,4-dihydroacridine-1(2H)-one (Table 3, entry 7)

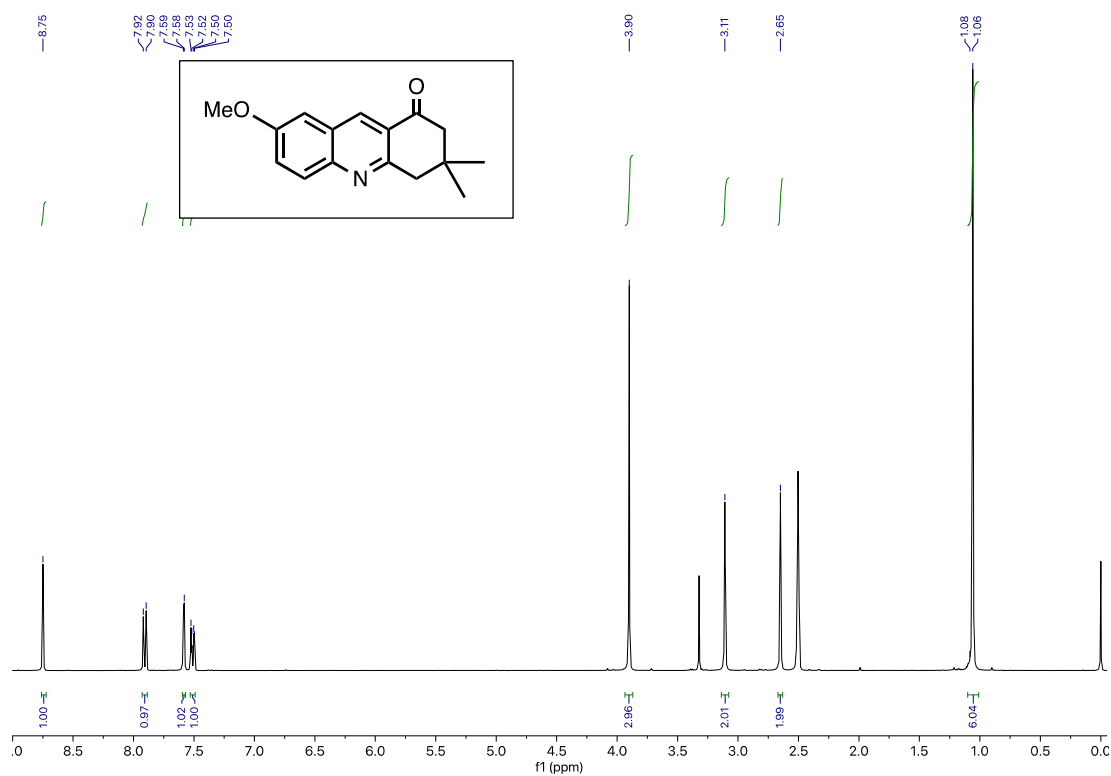

### 3.5.7. <sup>13</sup>C NMR for 7-Methoxy-3,3-dimethyl-3,4-dihydroacridine-1(2H)-one (Table 3, entry 7)

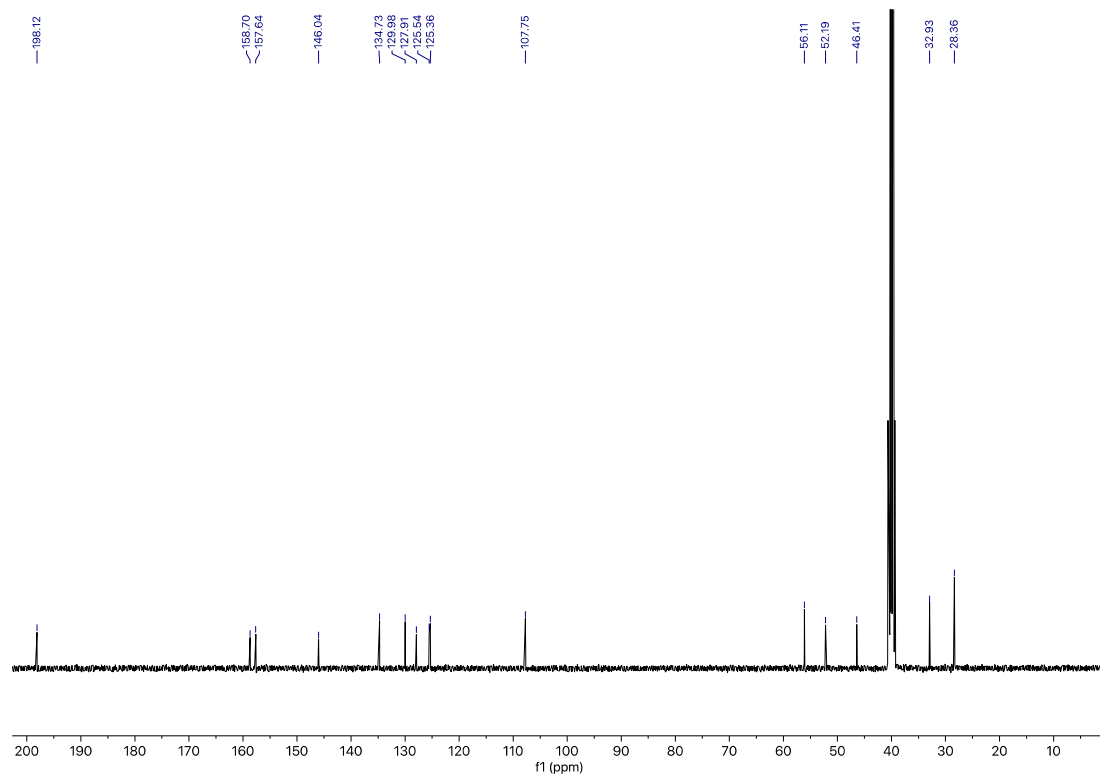

### 3.6.1. <sup>1</sup>H NMR for 4-Methyl-3-propionylquinolin-2(1H)-one (Table 4, entry 1)

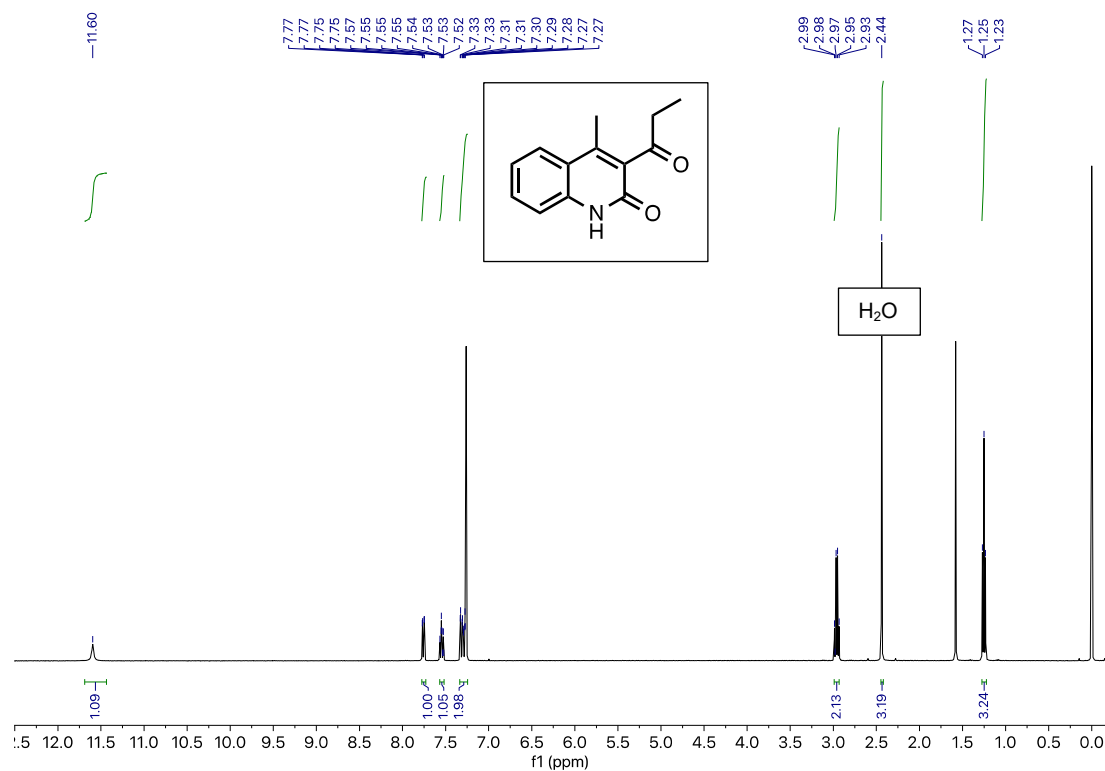

### 3.6.1. <sup>13</sup>C NMR for 4-Methyl-3-propionylquinolin-2(1H)-one (Table 4, entry 1)

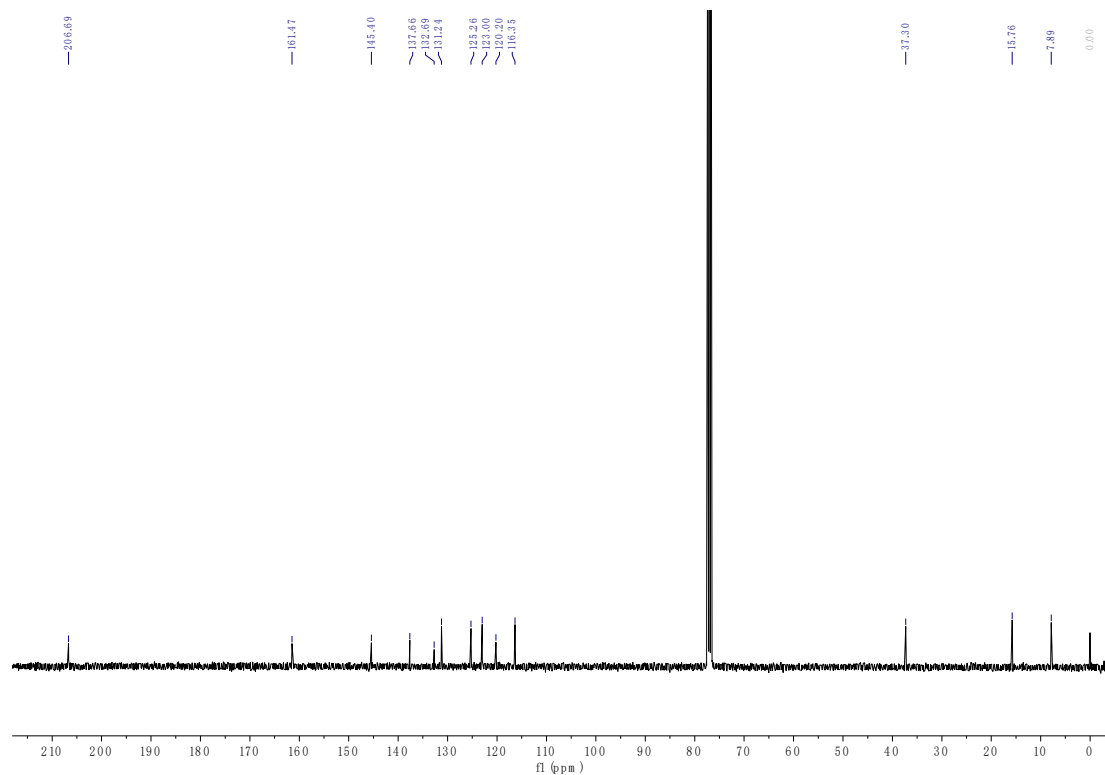

### 3.6.2. <sup>1</sup>H NMR for 3-Benzoyl-4-methylquinolin-2(1H)-one (Table 4, entry 2)

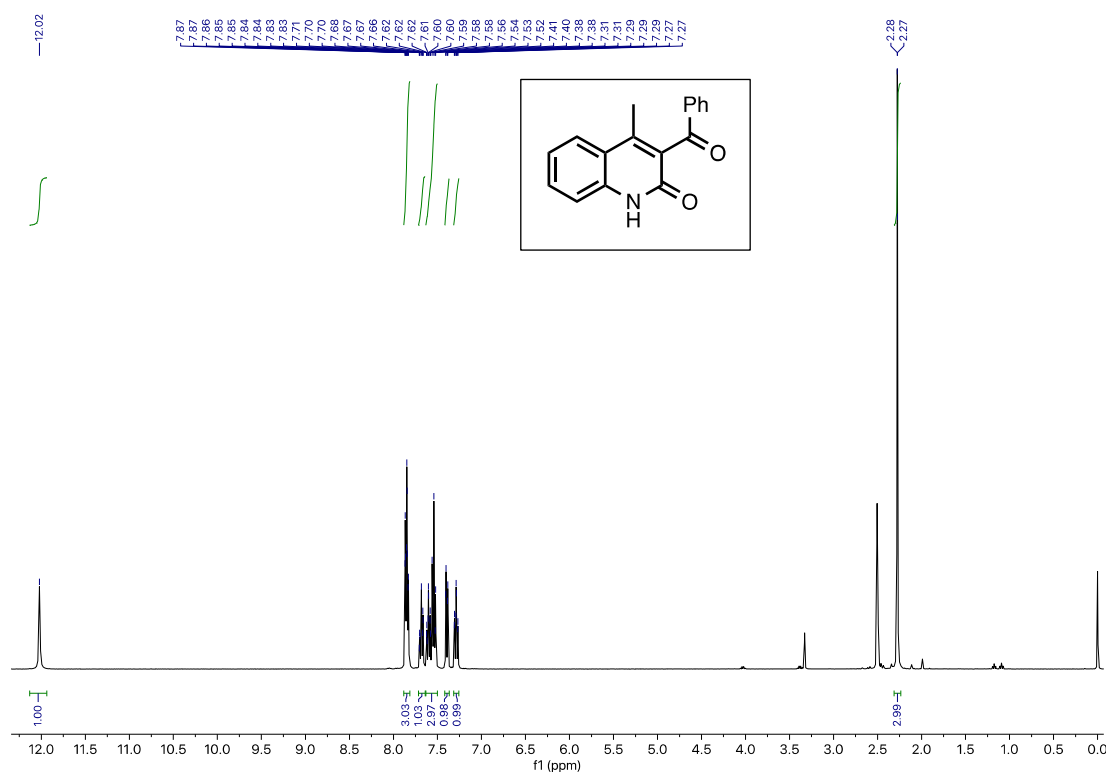

### 3.6.2. <sup>13</sup>C NMR for 3-Benzoyl-4-methylquinolin-2(1H)-one (Table 4, entry 2)

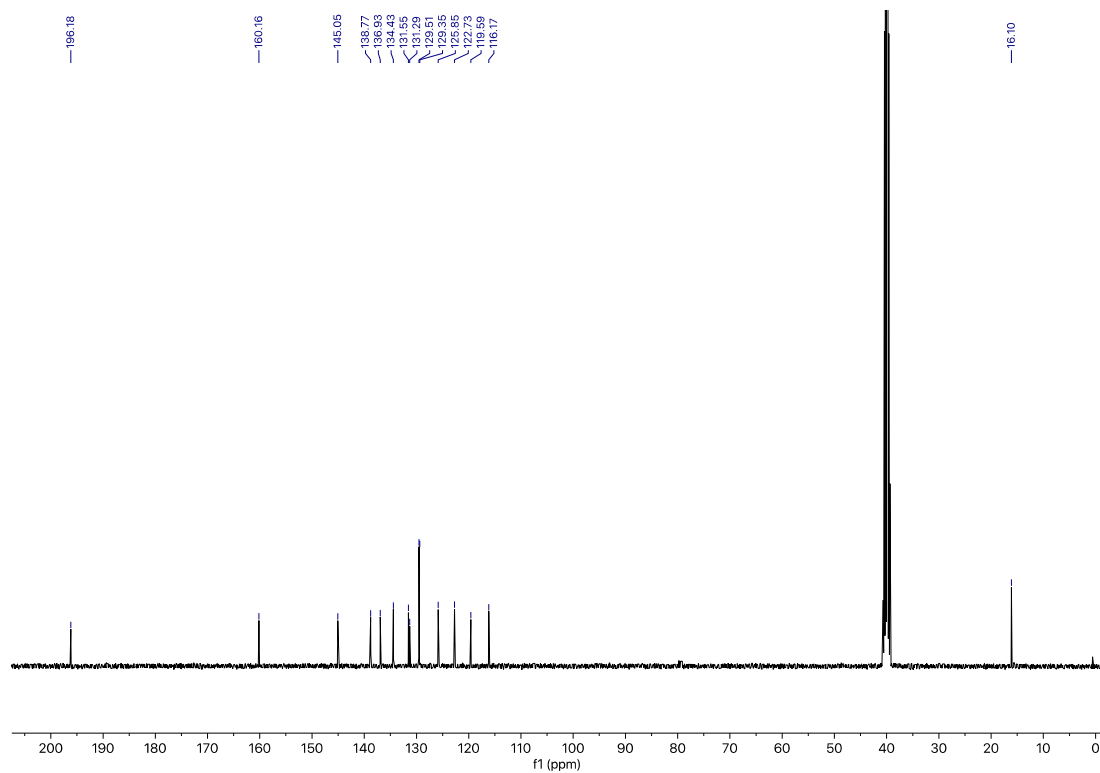

### 3.6.3. <sup>1</sup>H NMR for 4-Methyl-2-phenylquinoline-3-carbonitrile (Table 4, entry 3)

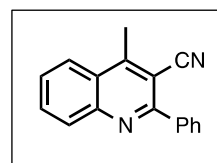

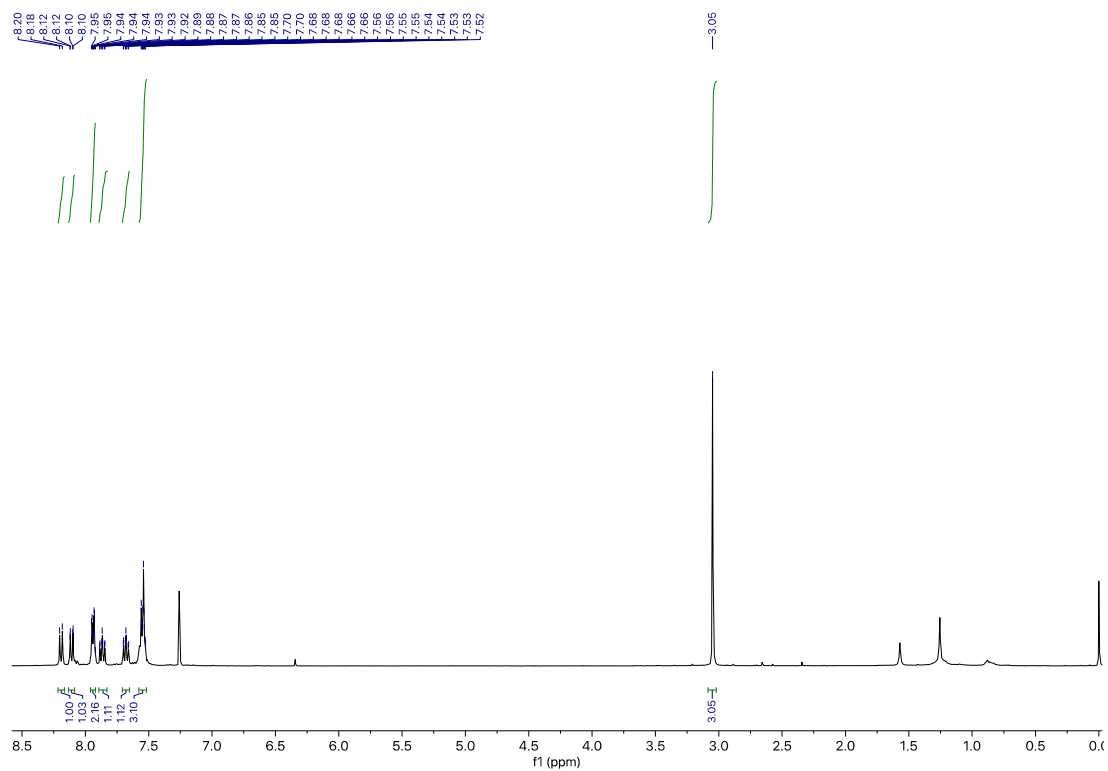

### 3.6.3. <sup>13</sup>C NMR for 4-Methyl-2-phenylquinoline-3-carbonitrile (Table 4, entry 3)

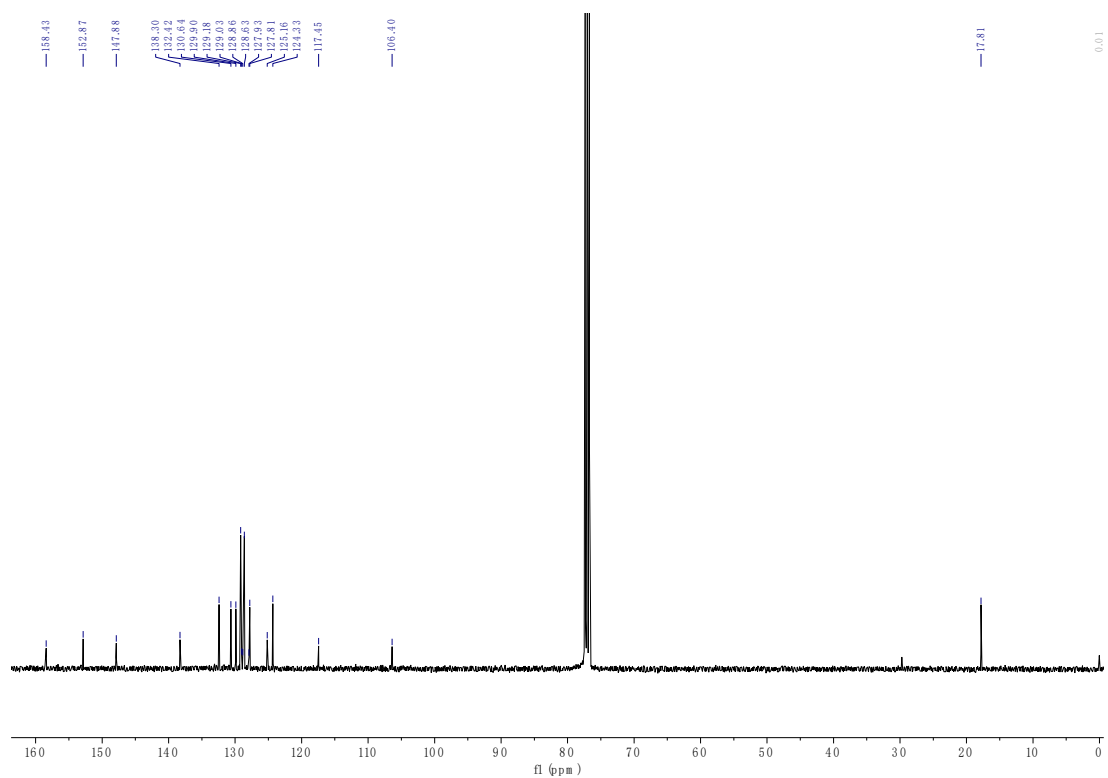

### 3.6.4. <sup>1</sup>H NMR for 1-(2,4-Dimethylquinolin-3-yl)ethan-1-one (Table 4, entry 4)

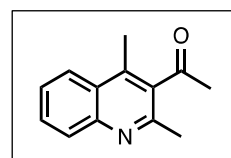

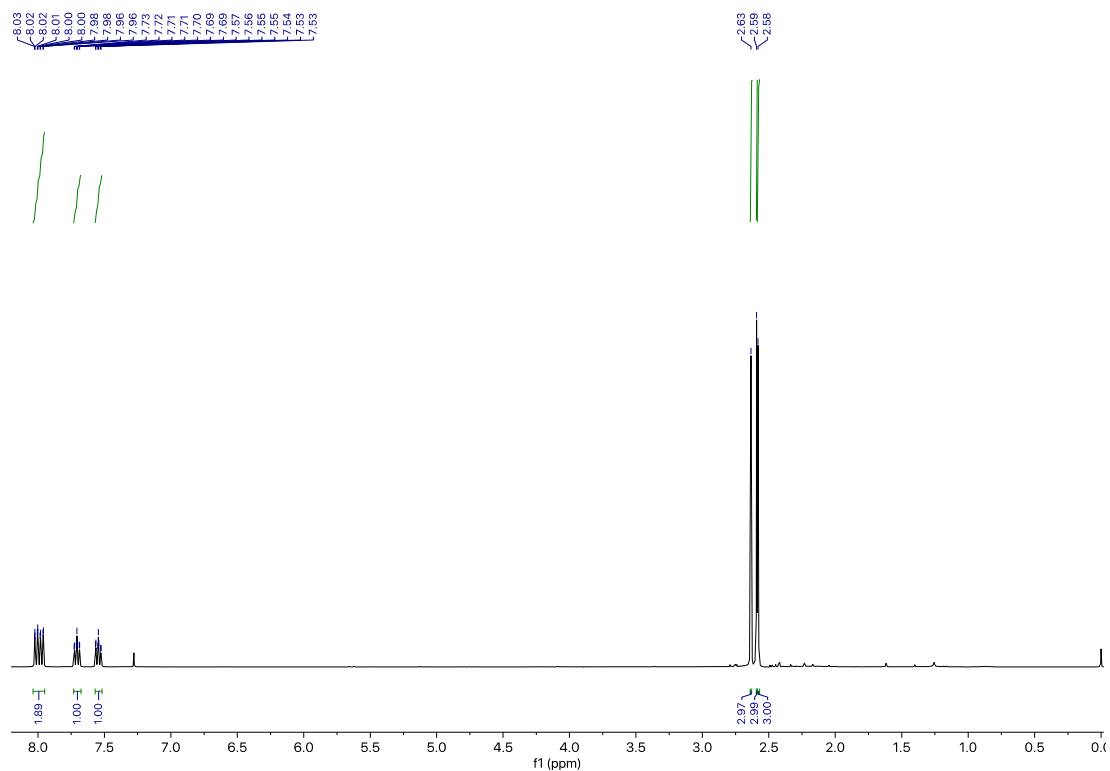

#### 3.6.4. <sup>13</sup>C NMR for 1-(2,4-Dimethylquinolin-3-yl)ethan-1-one (Table 4, entry 4)

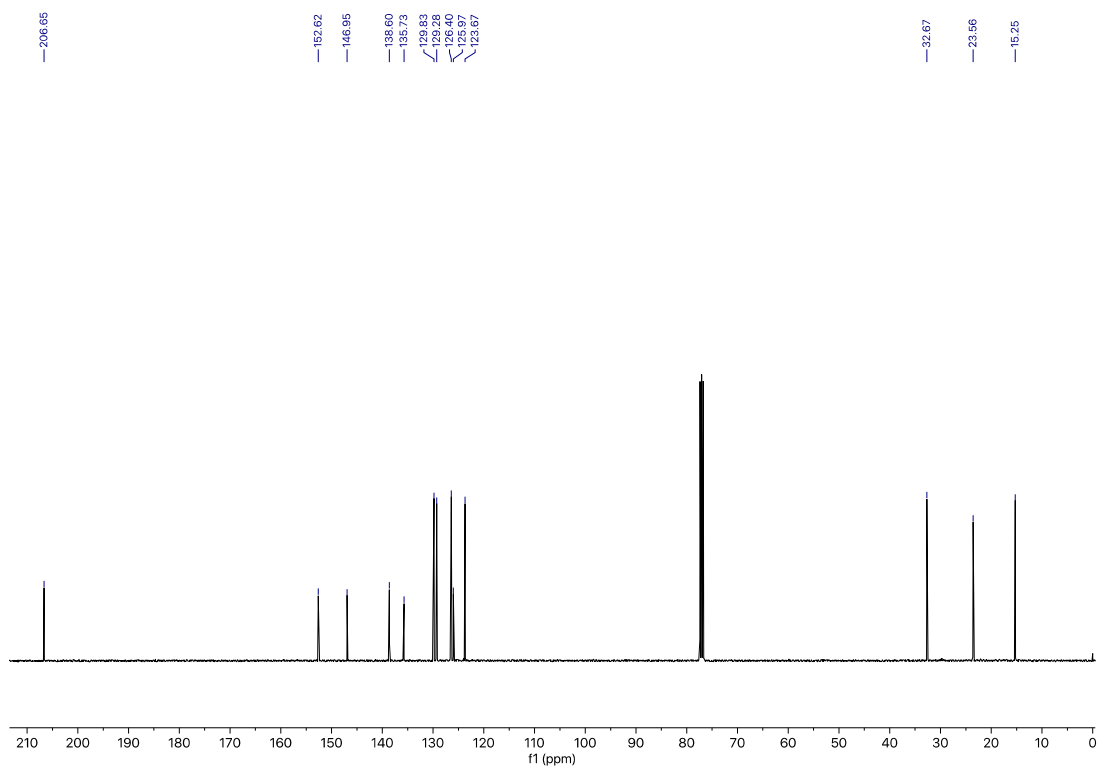

#### 3.6.5. <sup>1</sup>H NMR for 3,3,9-Trimethyl-3,4-dihydroacridine-1(2H)-one (Table 4, entry 5)



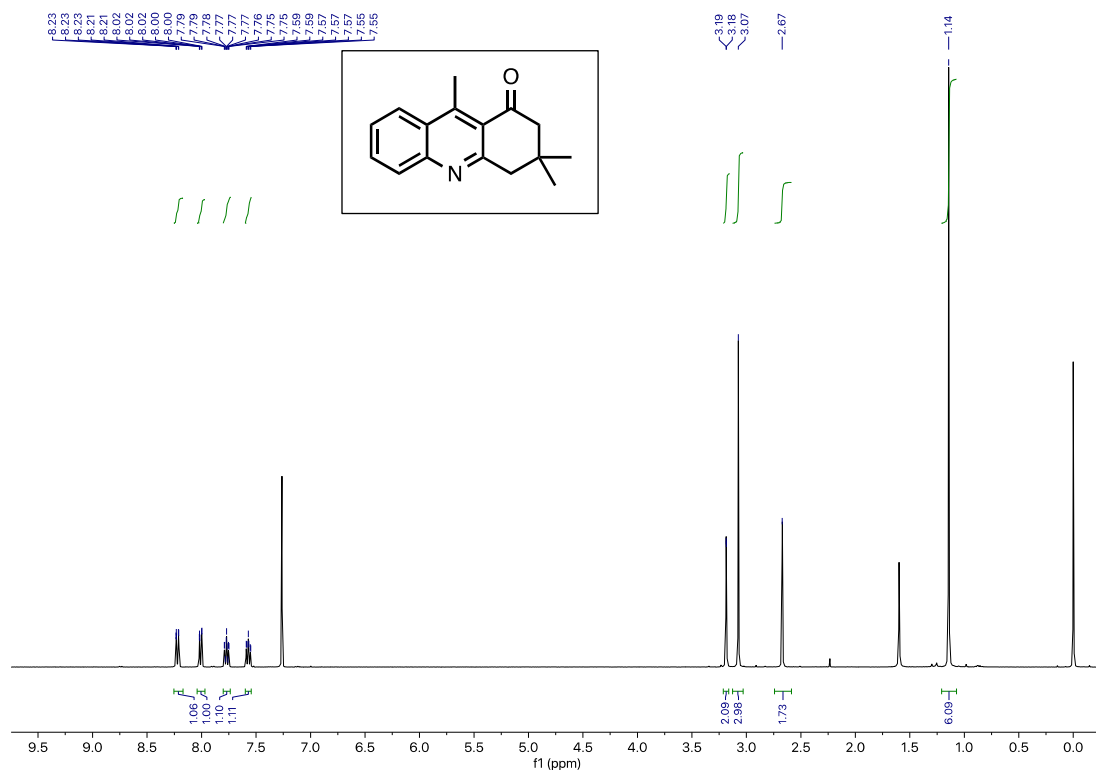

### 3.6.5. <sup>13</sup>C NMR for 3,3,9-Trimethyl-3,4-dihydroacridin-1(2H)-one (Table 4, entry 5)

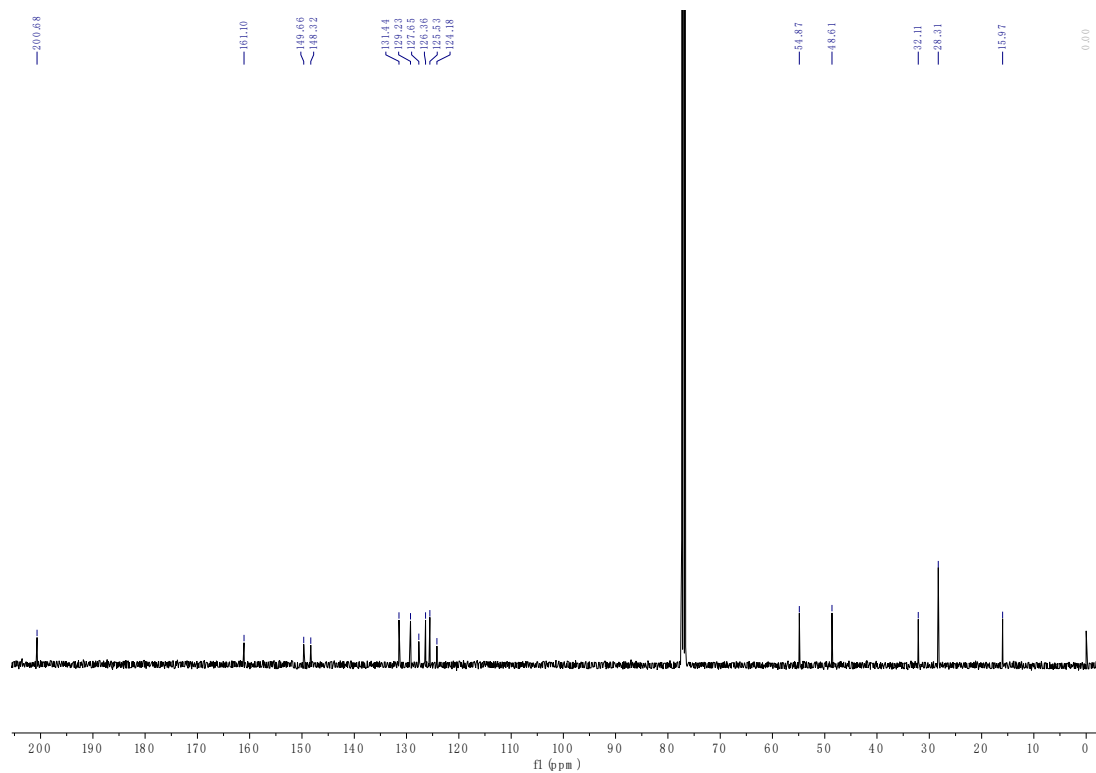

### 3.6.6. <sup>1</sup>H NMR for 2,4-Dimethyl-3-phenylquinoline (Table 4, entry 6)

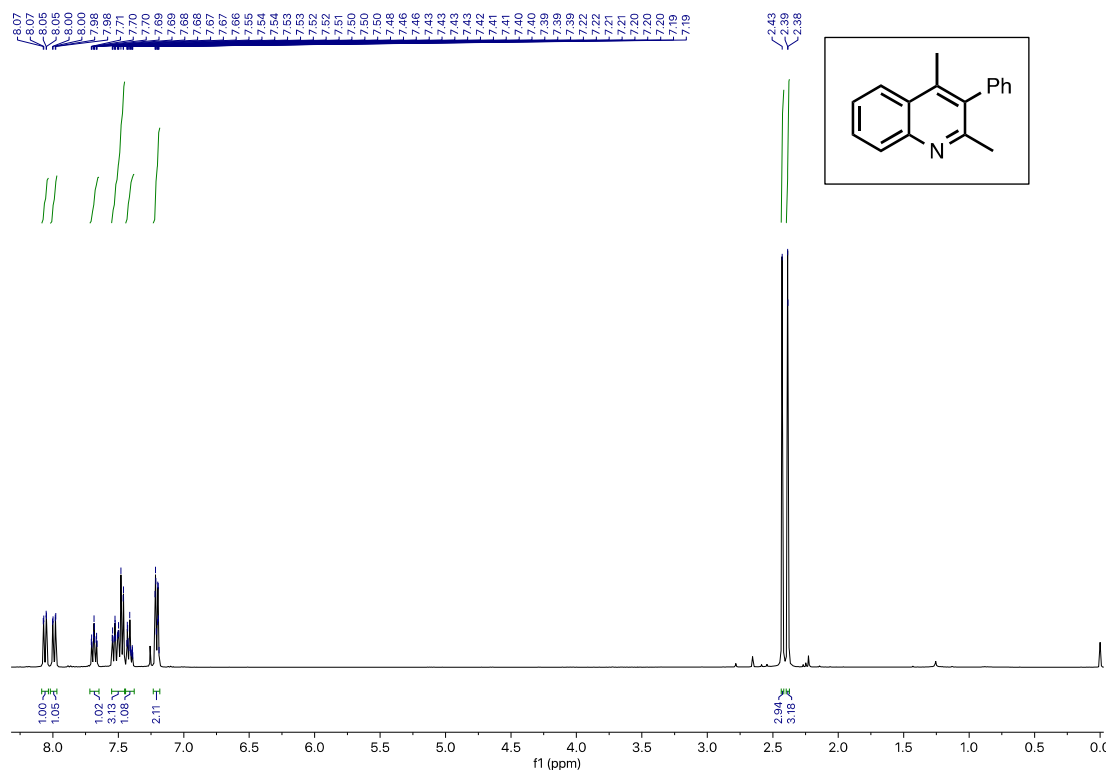

### 3.6.6. <sup>13</sup>C NMR for 2,4-Dimethyl-3-phenylquinoline (Table 4, entry 6)

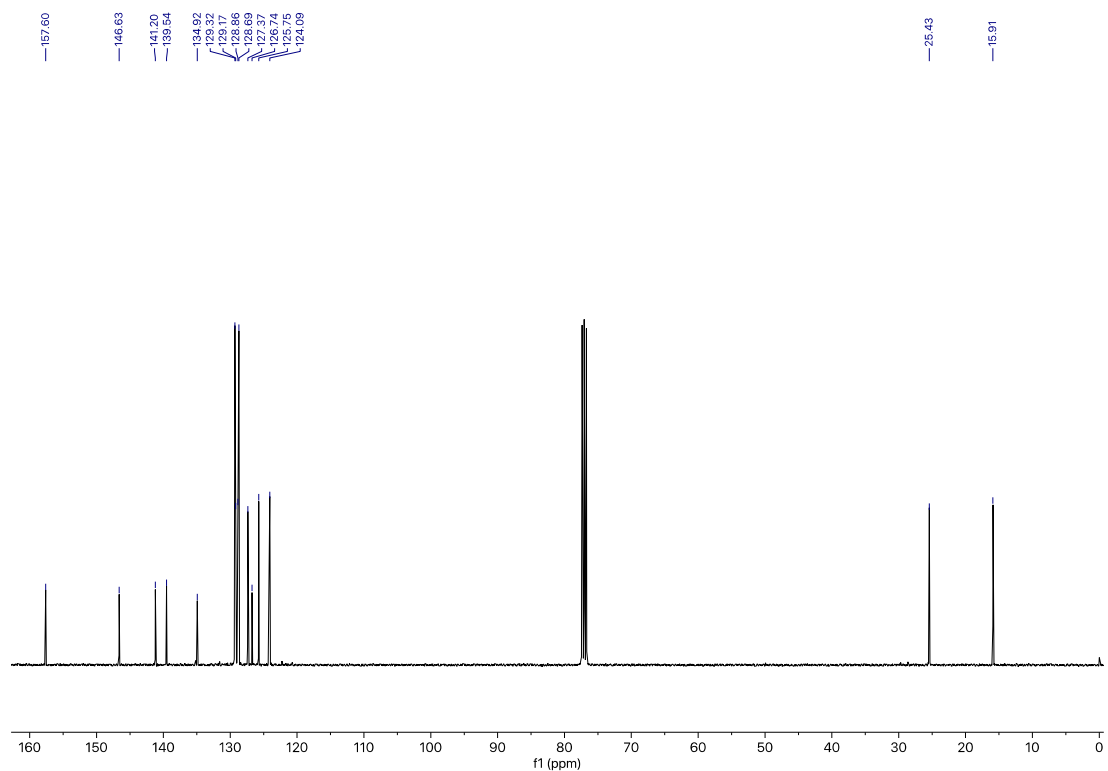

### 3.6.7. <sup>1</sup>H NMR for 12-Methyl-5,6-dihydrobenzo[*a*]acridine (Table 4, entry 7)

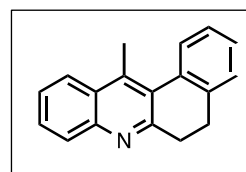

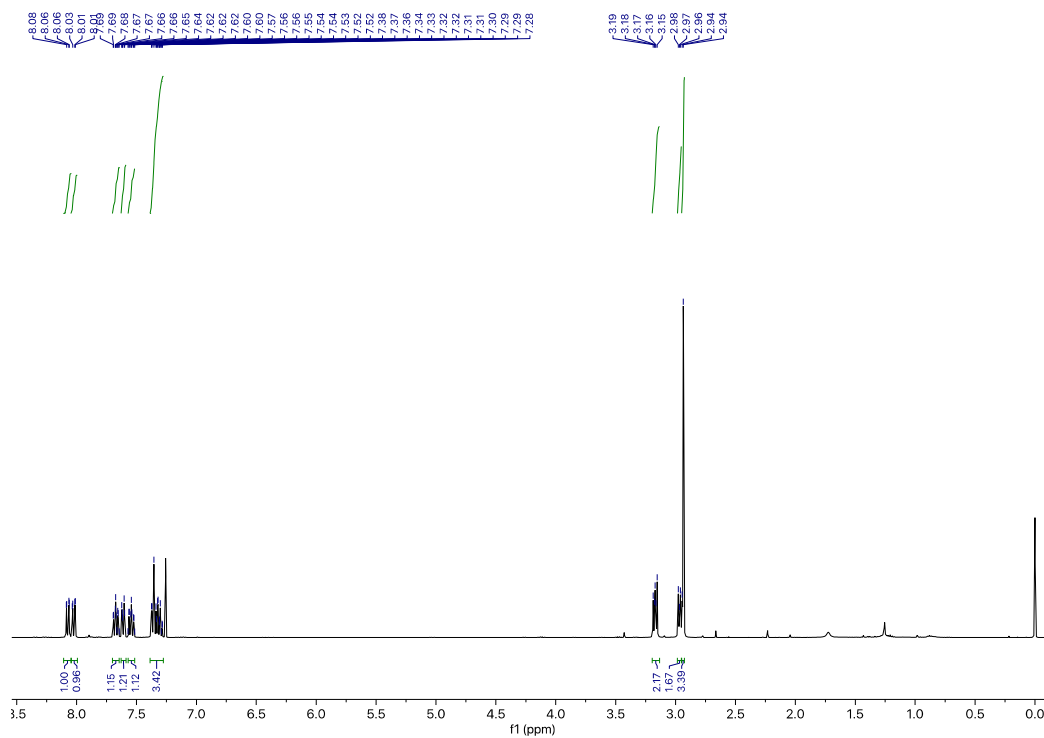

### 3.6.7. <sup>13</sup>C NMR for 12-Methyl-5,6-dihydrobenzo[*a*]acridine (Table 4, entry 7)

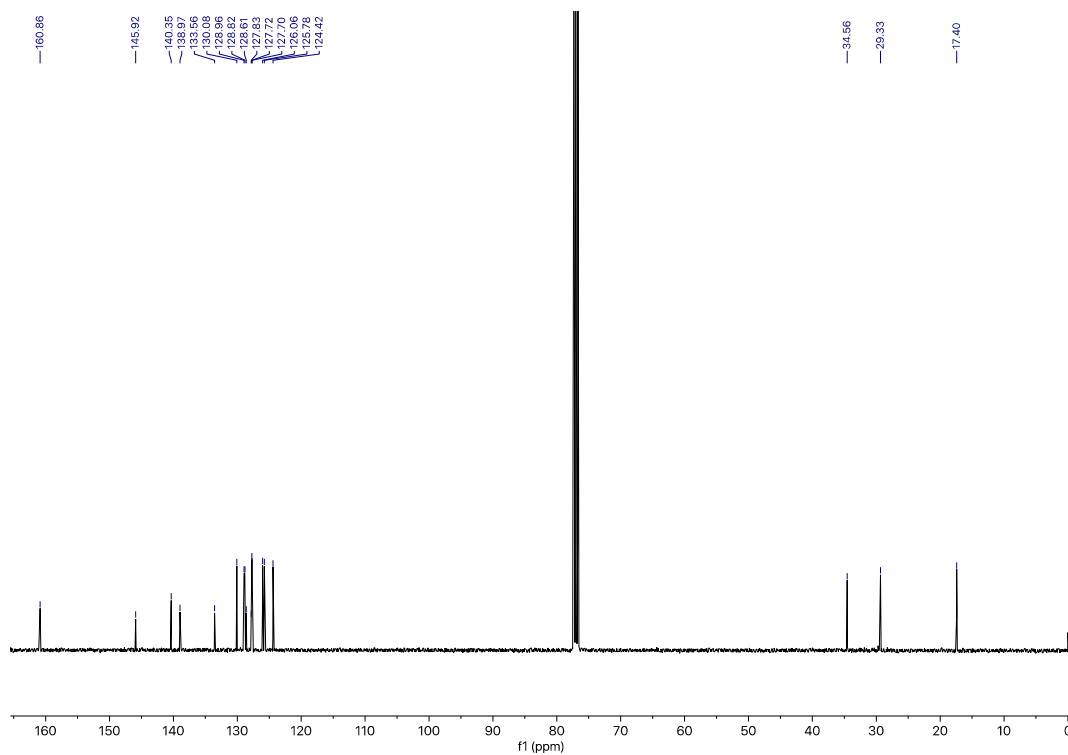

### 3.7.1. <sup>1</sup>H NMR for Methyl 2-ethyl-4-phenylquinoline-3-carboxylate (Table 5, entry 1)

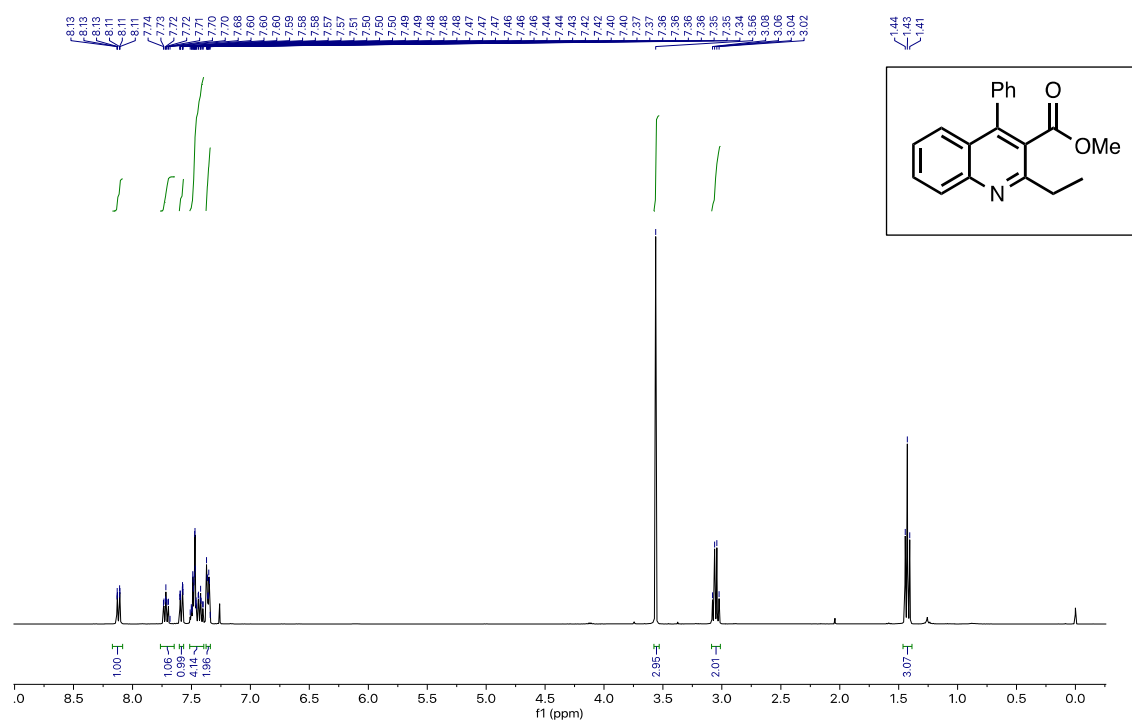

### 3.7.1. <sup>13</sup>C NMR for Methyl 2-ethyl-4-phenylquinoline-3-carboxylate (Table 5, entry 1)

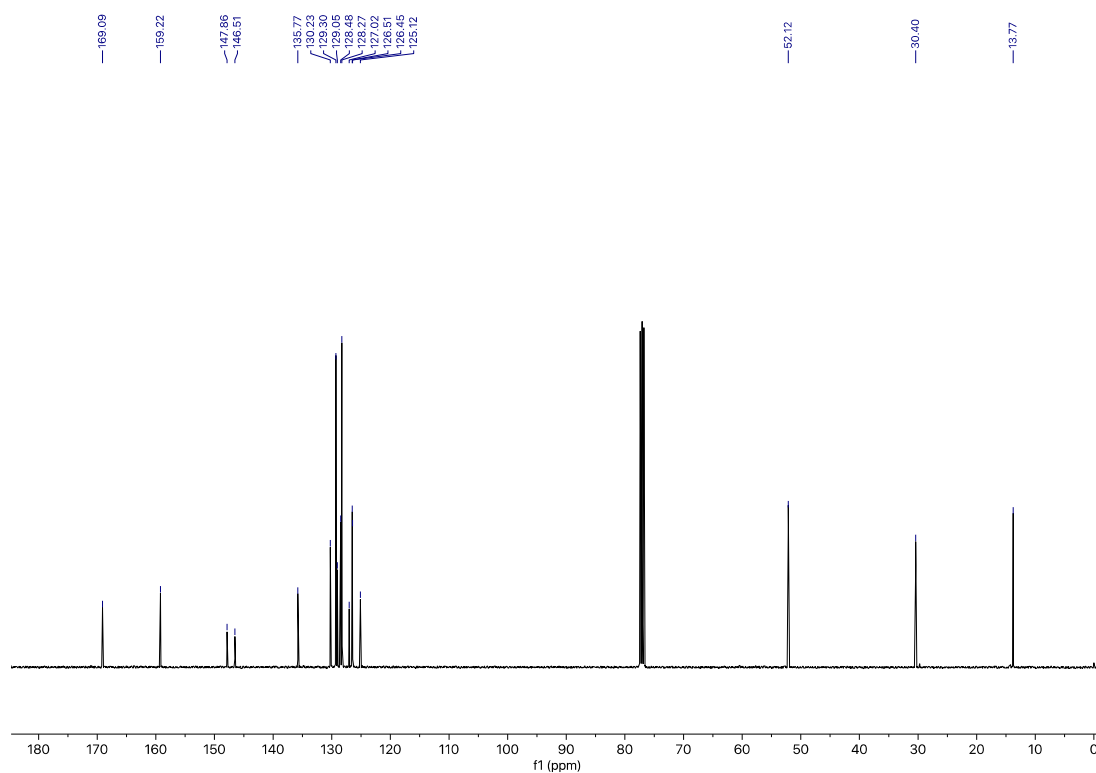

**3.7.2. and 3.7.3. <sup>1</sup>H NMR for 3-Benzoyl-4-phenylquinolin-2(1*H*)-one (Table 5, entries 2 and 3)**

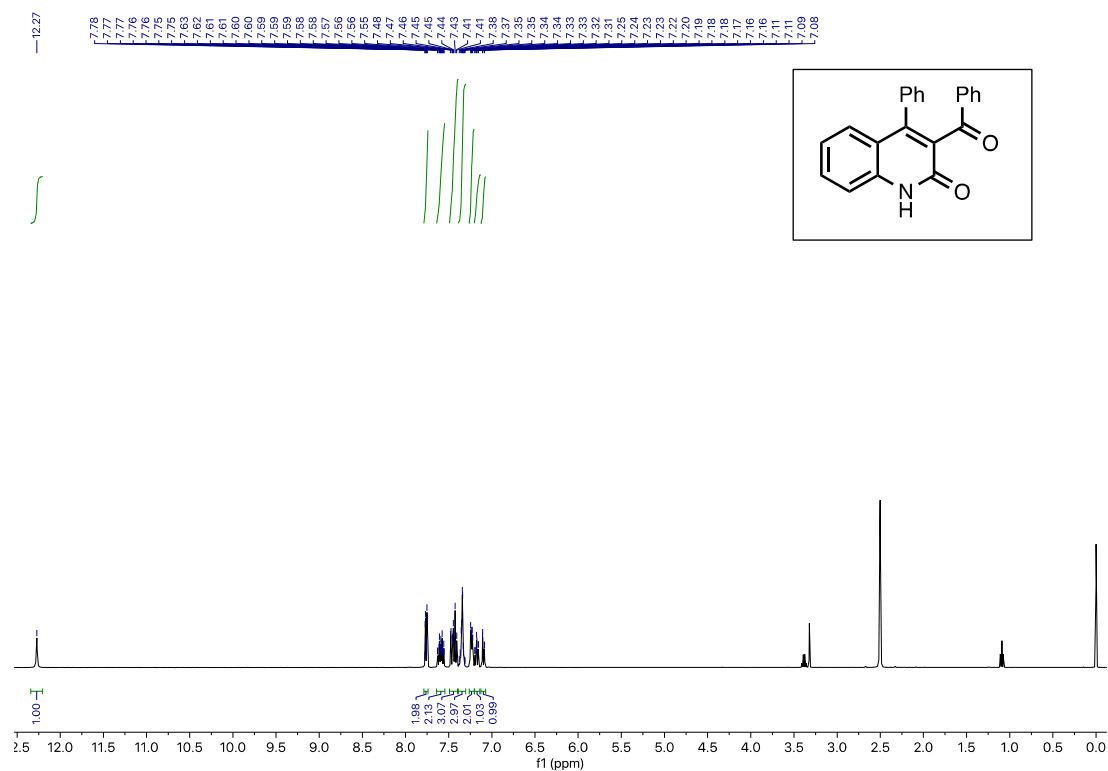

### 3.7.2. and 3.7.3. <sup>13</sup>C NMR for 3-Benzoyl-4-phenylquinolin-2(1H)-one (Table 5, entries 2 and 3)

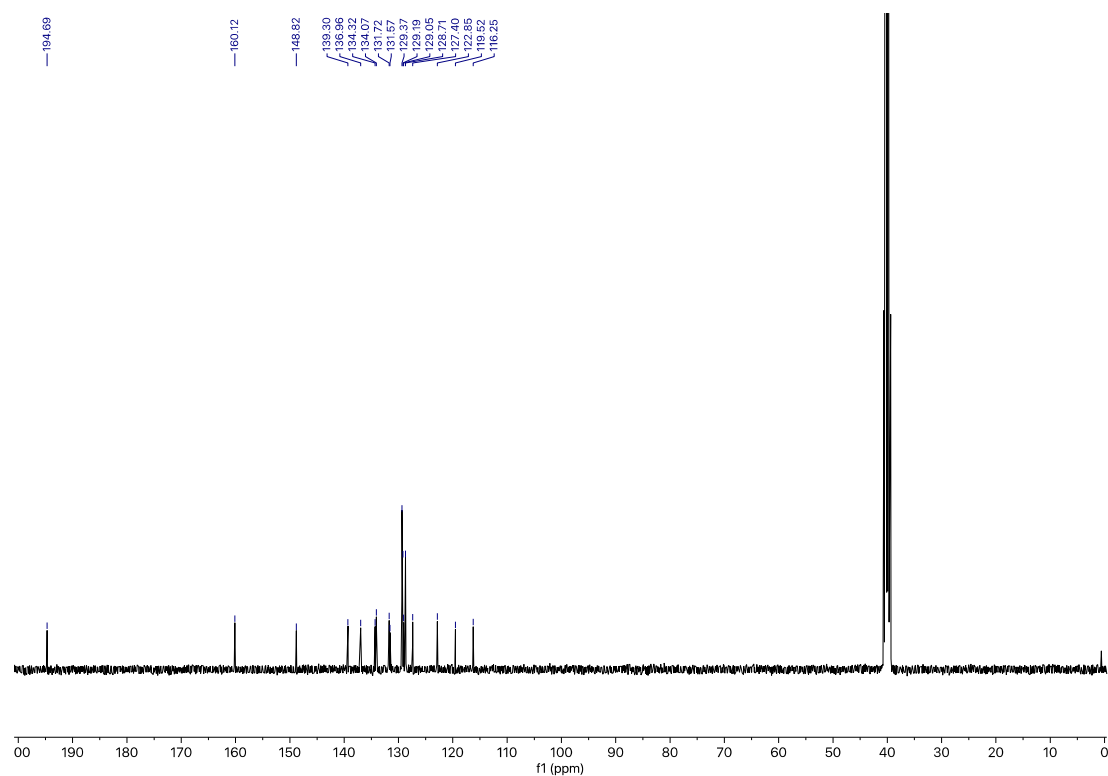

### 3.7.4. <sup>1</sup>H NMR for 1-(2-Methyl-4-phenylquinolin-3-yl)ethan-1-one (Table 5, entry 4)

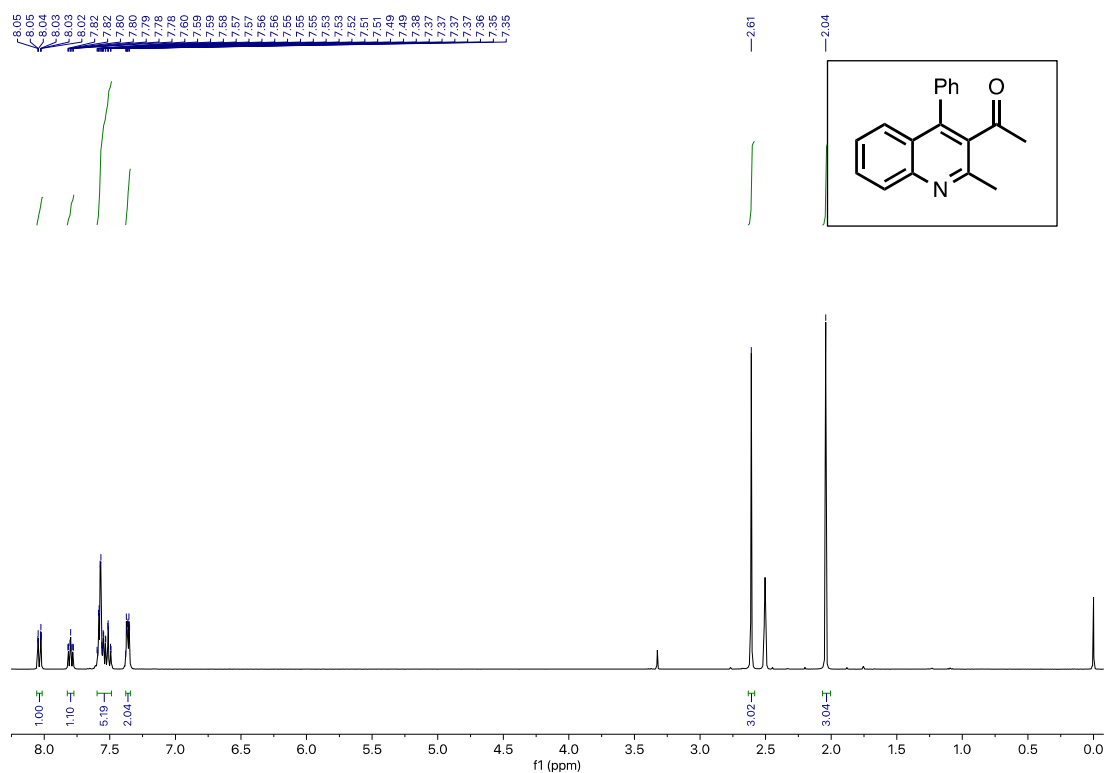

### 3.7.4. <sup>13</sup>C NMR for 1-(2-Methyl-4-phenylquinolin-3-yl)ethan-1-one (Table 5, entry 4)

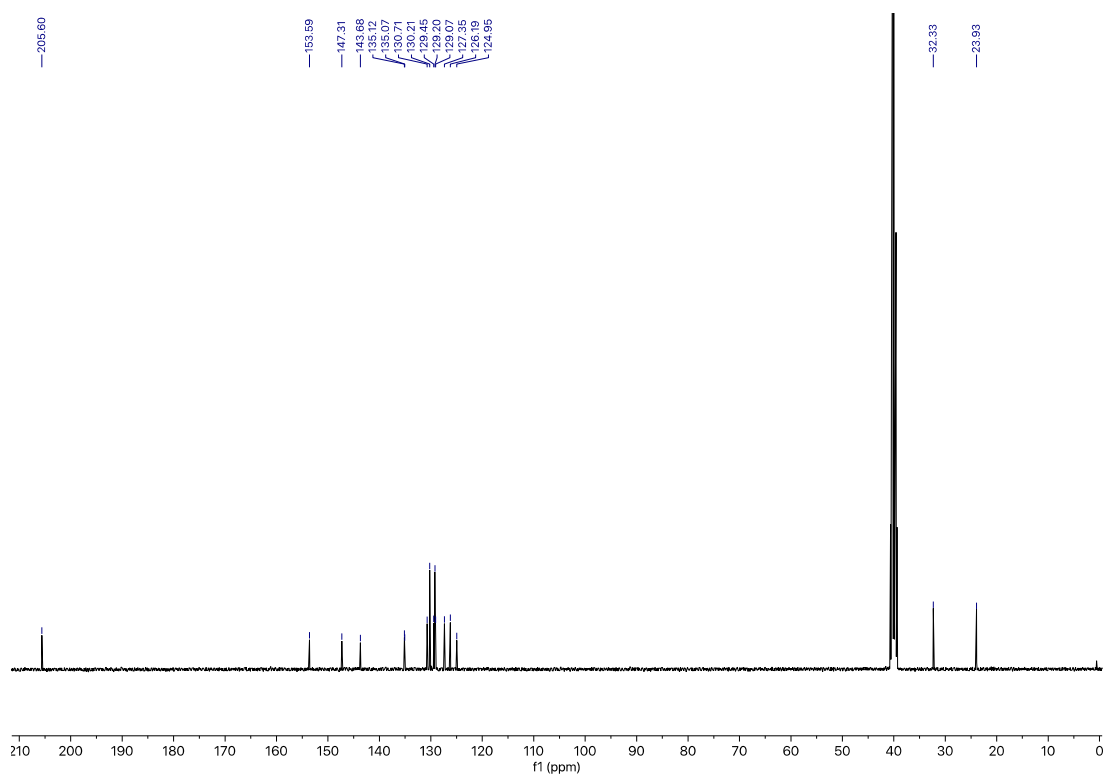

### 3.7.5. <sup>1</sup>H NMR for 3,3-Dimethyl-9-phenyl-3,4-dihydroacridin-1(2H)-one (Table 5, entry 5)

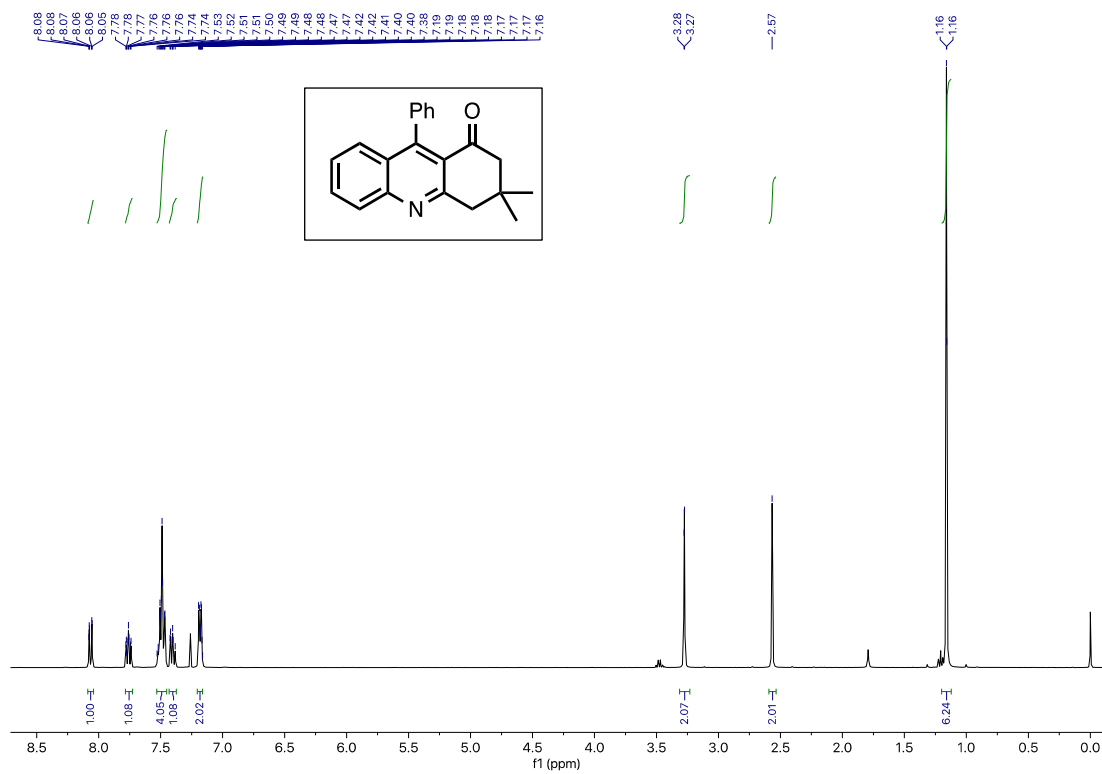

### 3.7.5. <sup>13</sup>C NMR for 3,3-Dimethyl-9-phenyl-3,4-dihydroacridin-1(2H)-one (Table 5, entry 5)

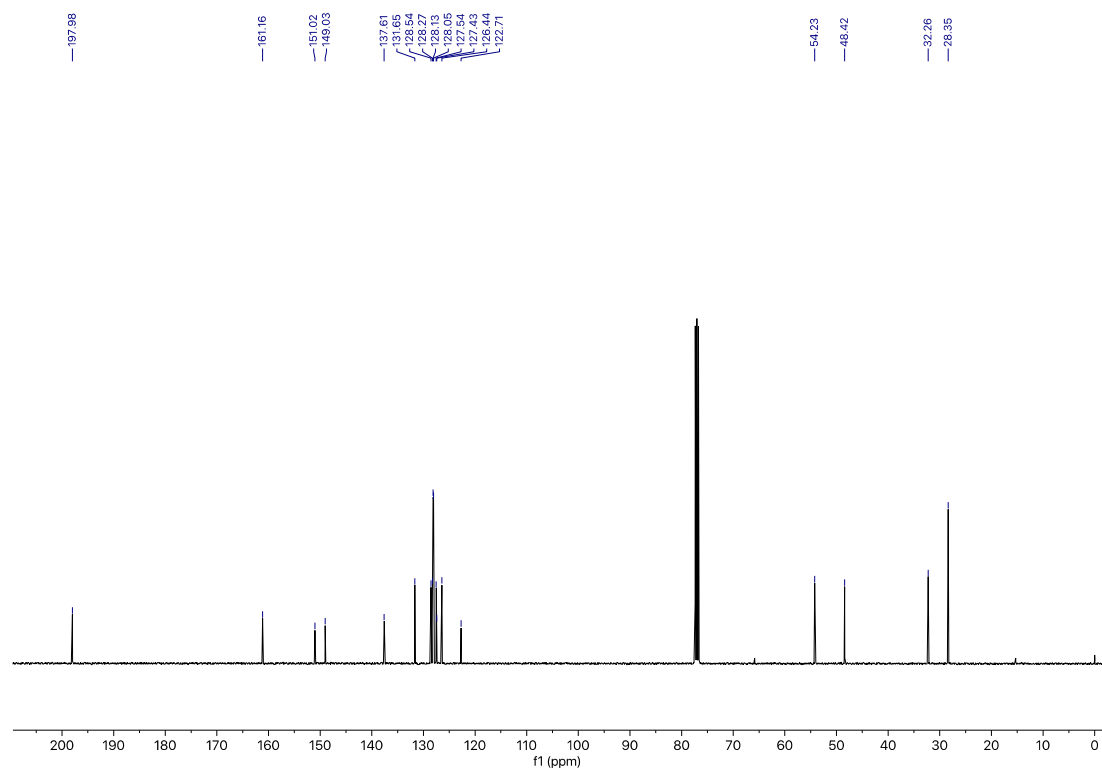

### 3.7.6. <sup>1</sup>H NMR for 2-Methyl-3,4-diphenylquinoline (Table 5, entry 6)

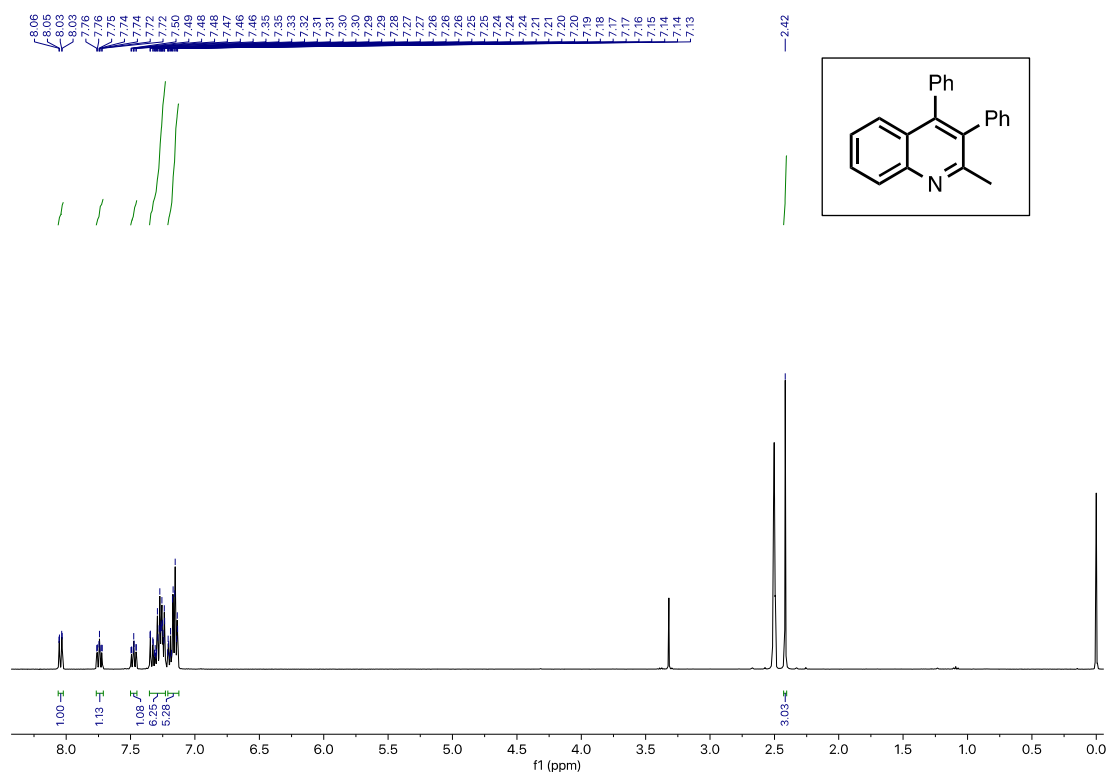

### 3.7.6. <sup>13</sup>C NMR for 2-Methyl-3,4-diphenylquinoline (Table 5, entry 6)

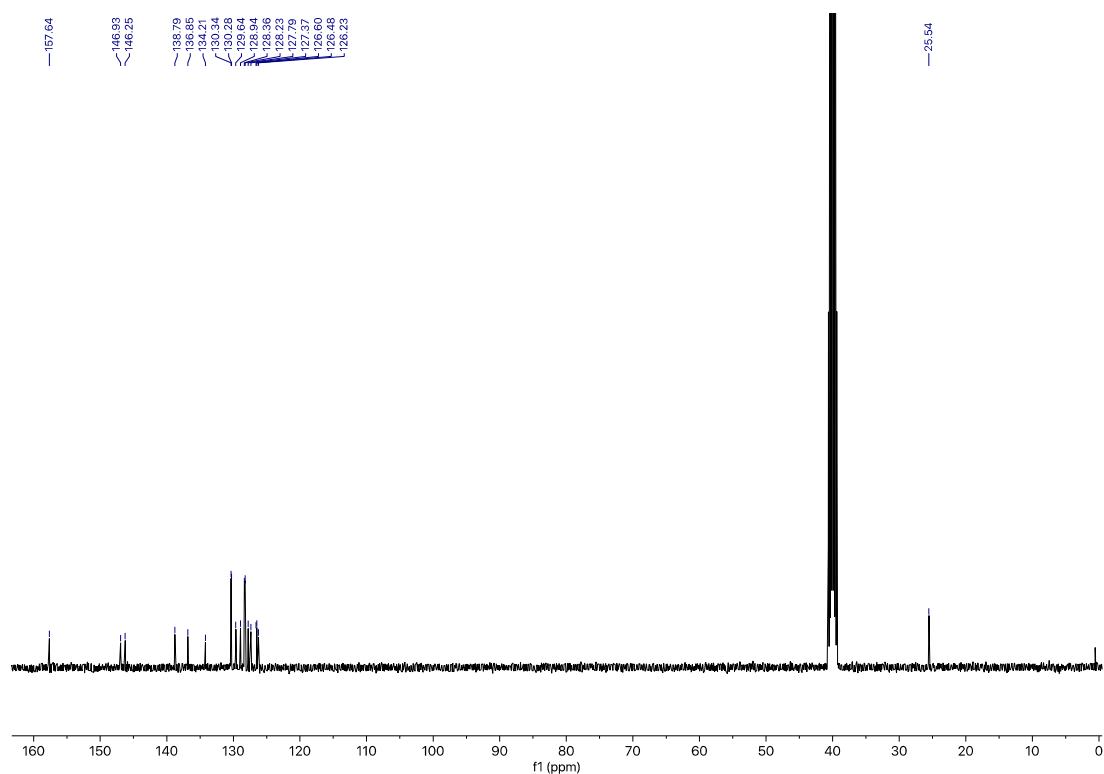

### 3.7.7. <sup>1</sup>H NMR for 3-Butyl-2,4-diphenylquinoline (Table 5, entry 7)



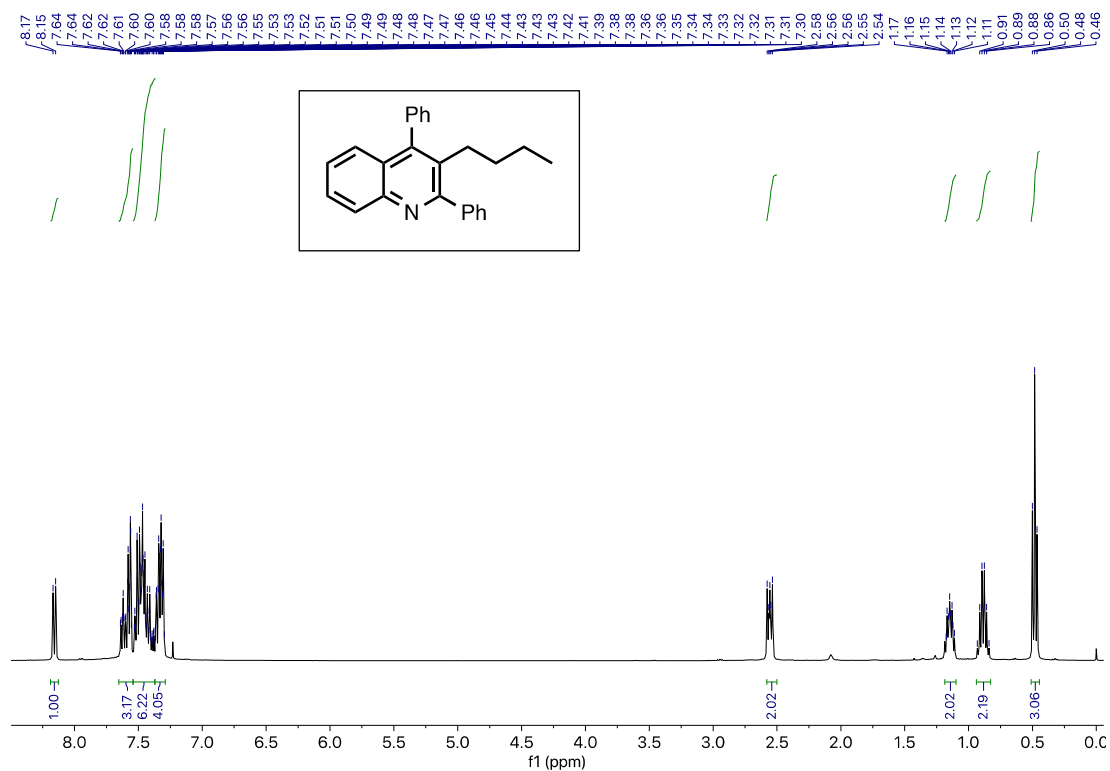

### 3.7.7. <sup>13</sup>C NMR for 3-Butyl-2,4-diphenylquinoline (Table 5, entry 7)

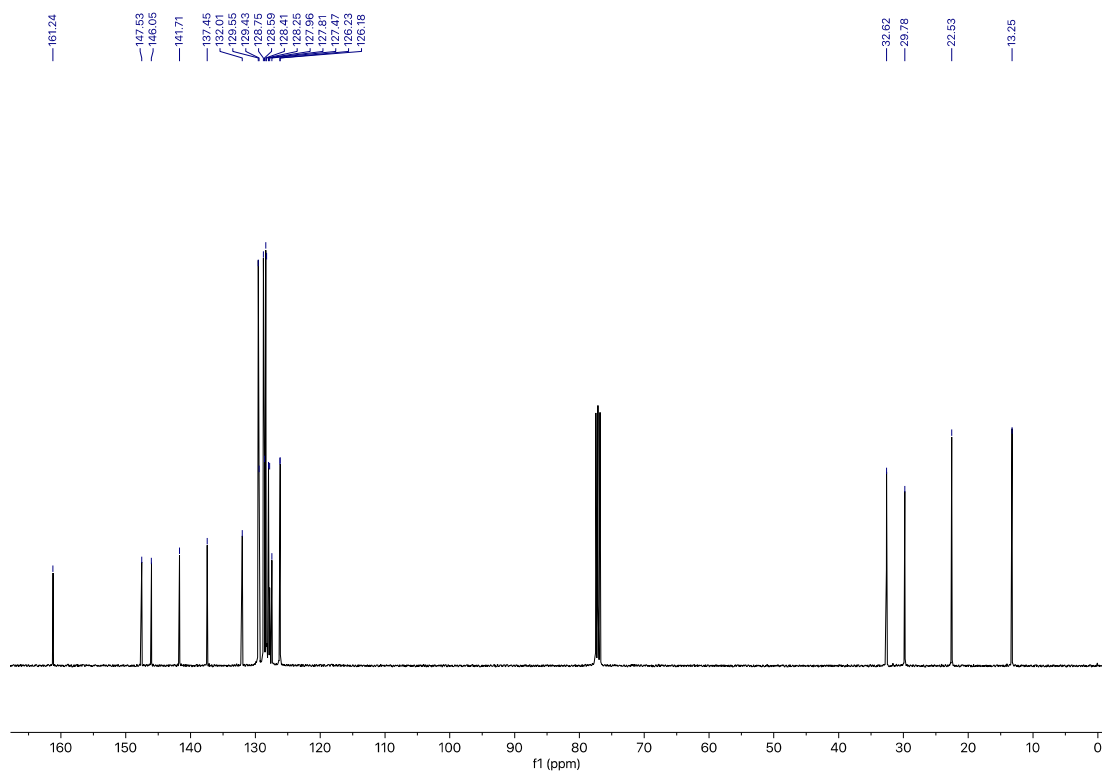

### 3.7.8. <sup>1</sup>H NMR for 12-Phenyl-5,6-dihydrobenzo[*a*]acridine (Table 5, entry 8)

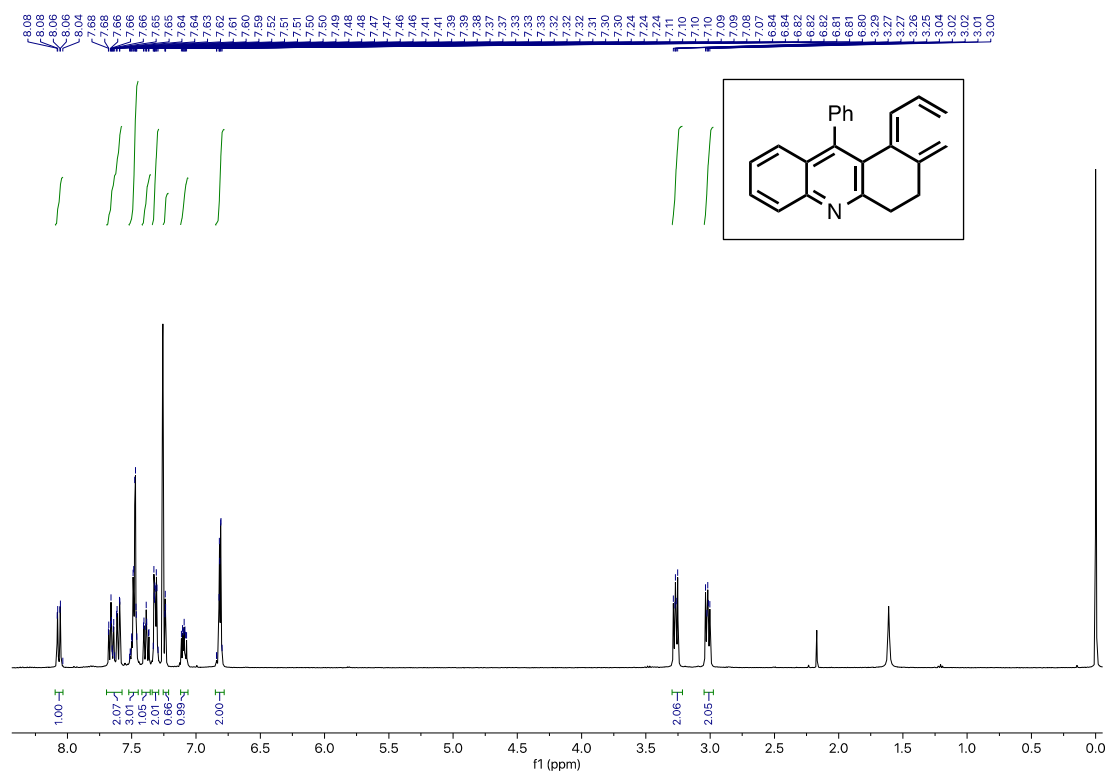

### 3.7.8. <sup>1</sup>H NMR for 12-Phenyl-5,6-dihydrobenzo[*a*]acridine (Table 5, entry 8)

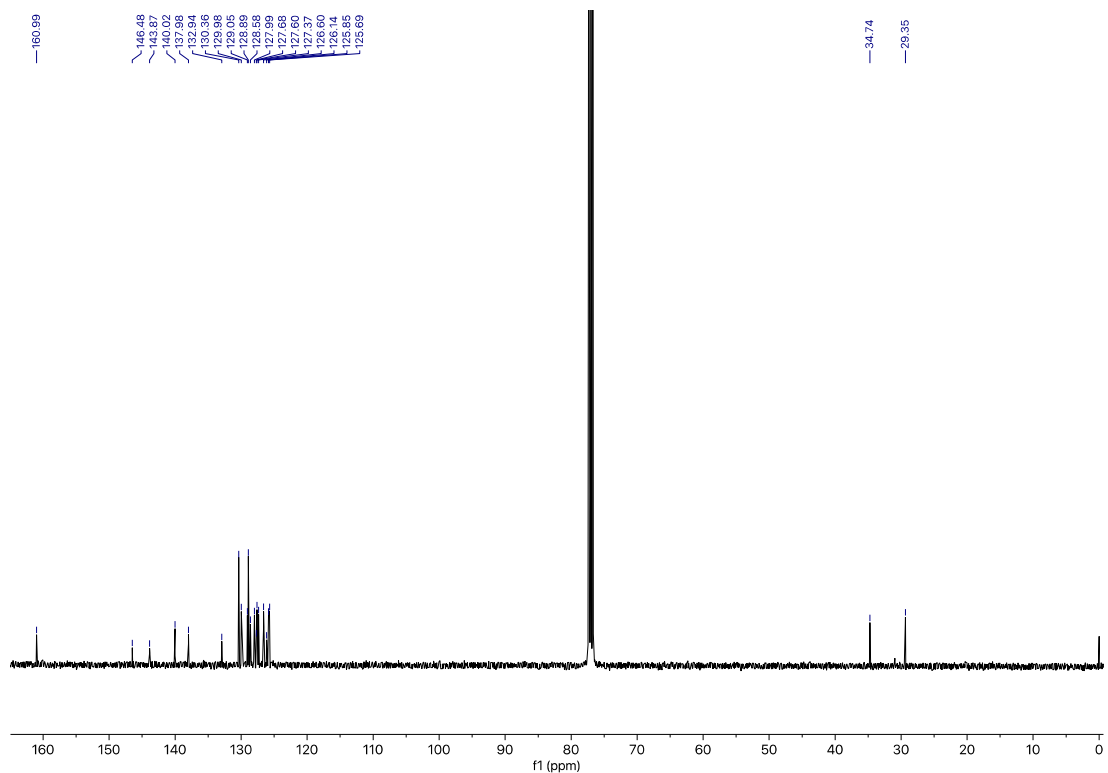

Supplement: s1 [file s1]
